# Supplementary material for: Prevalence and temporal trends of presarcopenia metrics and related body composition measurements from the 1999 to 2006 NHANES
Source: PubMed Central journal article supplement — BMJ Open. 2020 Aug 5;10(8):e034495. doi: 10.1136/bmjopen-2019-034495 (PMC7410000; doi:10.1136/bmjopen-2019-034495), 2020-08-05
Supplement: bmjopen-2019-034495.draft_revisions.pdf [file bmjopen-2019-034495.draft_revisions.pdf]

# BMJ Open

BMJ Open is committed to open peer review. As part of this commitment we make the peer review history of every article we publish publicly available.

When an article is published we post the peer reviewers' comments and the authors' responses online. We also post the versions of the paper that were used during peer review. These are the versions that the peer review comments apply to.

The versions of the paper that follow are the versions that were submitted during the peer review process. They are not the versions of record or the final published versions. They should not be cited or distributed as the published version of this manuscript.

BMJ Open is an open access journal and the full, final, typeset and author-corrected version of record of the manuscript is available on our site with no access controls, subscription charges or pay-per-view fees (<http://bmjopen.bmj.com>).

If you have any questions on BMJ Open's open peer review process please email [info.bmjopen@bmj.com](mailto:info.bmjopen@bmj.com)

# BMJ Open

## Prevalence and Trends of Sarcopenia Metrics and Related Body Composition: data from NHANES 1999-2006

|                               |                                                                                                                                                                                                                                                                                                                                                                                                                                                                                                                                                                                                                                                                                                     |
|-------------------------------|-----------------------------------------------------------------------------------------------------------------------------------------------------------------------------------------------------------------------------------------------------------------------------------------------------------------------------------------------------------------------------------------------------------------------------------------------------------------------------------------------------------------------------------------------------------------------------------------------------------------------------------------------------------------------------------------------------|
| Journal:                      | <i>BMJ Open</i>                                                                                                                                                                                                                                                                                                                                                                                                                                                                                                                                                                                                                                                                                     |
| Manuscript ID                 | bmjopen-2019-034495                                                                                                                                                                                                                                                                                                                                                                                                                                                                                                                                                                                                                                                                                 |
| Article Type:                 | Original research                                                                                                                                                                                                                                                                                                                                                                                                                                                                                                                                                                                                                                                                                   |
| Date Submitted by the Author: | 28-Sep-2019                                                                                                                                                                                                                                                                                                                                                                                                                                                                                                                                                                                                                                                                                         |
| Complete List of Authors:     | <p>Li, Jibin; Sun Yat-sen University Cancer Center, Department of Clinical Research; Sun Yat-sen University State Key Laboratory of Oncology in South China</p> <p>Wu, Yuwan; Xinhua Hospital Affiliated to Shanghai Jiaotong University School of Medicine, Department of Pediatrics</p> <p>Gu, Dantong; Fudan University School of Public Health, Department of Bio-statistics</p> <p>Deng, Yang; Sun Yat-sen University School of Nursing</p> <p>Li, Huajun; Xinhua Hospital Affiliated to Shanghai Jiaotong University School of Medicine, Department of Pediatrics</p> <p>Zhang, Xi; Xinhua Hospital Affiliated to Shanghai Jiaotong University School of Medicine, Clinical Research Unit</p> |
| Keywords:                     | Sarcopenia Metrics, Body Composition, National Health and Nutrition Examination Surveys, Time Trends                                                                                                                                                                                                                                                                                                                                                                                                                                                                                                                                                                                                |
|                               |                                                                                                                                                                                                                                                                                                                                                                                                                                                                                                                                                                                                                                                                                                     |

SCHOLARONE™  
Manuscripts

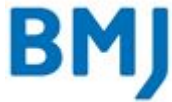

I, the Submitting Author has the right to grant and does grant on behalf of all authors of the Work (as defined in the below author licence), an exclusive licence and/or a non-exclusive licence for contributions from authors who are: i) UK Crown employees; ii) where BMJ has agreed a CC-BY licence shall apply, and/or iii) in accordance with the terms applicable for US Federal Government officers or employees acting as part of their official duties; on a worldwide, perpetual, irrevocable, royalty-free basis to BMJ Publishing Group Ltd ("BMJ") its licensees and where the relevant Journal is co-owned by BMJ to the co-owners of the Journal, to publish the Work in this journal and any other BMJ products and to exploit all rights, as set out in our [licence](#).

The Submitting Author accepts and understands that any supply made under these terms is made by BMJ to the Submitting Author unless you are acting as an employee on behalf of your employer or a postgraduate student of an affiliated institution which is paying any applicable article publishing charge ("APC") for Open Access articles. Where the Submitting Author wishes to make the Work available on an Open Access basis (and intends to pay the relevant APC), the terms of reuse of such Open Access shall be governed by a Creative Commons licence – details of these licences and which [Creative Commons](#) licence will apply to this Work are set out in our licence referred to above.

Other than as permitted in any relevant BMJ Author's Self Archiving Policies, I confirm this Work has not been accepted for publication elsewhere, is not being considered for publication elsewhere and does not duplicate material already published. I confirm all authors consent to publication of this Work and authorise the granting of this licence.

1  
2  
3 **Prevalence and Trends of Sarcopenia Metrics and Related Body Composition: data**  
4  
5 **from NHANES 1999-2006**  
6  
7

8 Jibin Li <sup>1</sup>, Yuwan Wu <sup>2</sup>, Dantong Gu <sup>3</sup>, Yang Deng <sup>4</sup>, Huajun Li<sup>2</sup>, Xi Zhang <sup>5</sup>  
9

10 **Affiliations:**

- 11  
12  
13 1. Department of Clinical Research, Sun Yat-sen University Cancer Center; State Key  
14 Laboratory of Oncology in Southern China; Collaborative Innovation Center for  
15 Cancer Medicine, Guangzhou 510060, China.  
16  
17  
18 2. Department of Pediatrics, Xin Hua Hospital, Shanghai Jiao Tong University  
19 School of Medicine, Shanghai, China  
20  
21  
22 3. Department of Bio-statistics, School of Public Health, Fudan University, Shanghai,  
23 China.  
24  
25  
26 4. School of nursing, Sun Yat-sen University, Guangzhou 510060, China  
27  
28  
29 5. Clinical Research Unit, Xin Hua Hospital, Shanghai Jiao Tong University School of  
30 Medicine, Shanghai, China.  
31  
32  
33

34 **Short title:** Trends of Sarcopenia Metrics among U.S. Adults  
35

36  
37 Correspondence to Xi Zhang, PhD  
38

39  
40 Clinical Research Unit, Xin Hua Hospital, Shanghai Jiao Tong University School of  
41 Medicine, 1665 Kongjiang Road, Kejiao Building 233B, Shanghai, China 200092.  
42  
43

44  
45 Tel: +86-021-2507-7482;  
46

47 Fax: +86-021-2507-7480;  
48

49 E-mail: [zhangxi@xinhumed.com.cn](mailto:zhangxi@xinhumed.com.cn)  
50

51 **Keywords:** Sarcopenia Metrics, Body Composition, National Health and Nutrition  
52

53 Examination Surveys, Time Trends  
54

55  
56 **Word count:** 2665  
57  
58  
59  
60

## Abstract

**Objective:** Evaluate the prevalence and time trends of sarcopenia and related body composition over time.

**Methods:** Sarcopenia and sarcopenia components were defined according to the European Working Group on Sarcopenia. Logistic or linear regression models were used to evaluate the linear trend of the prevalence of sarcopenia, obesity, and body composition.

**Setting:** This is an analysis study of the data from NHANES (1999-2006).

**Participants:** A total of 29,947 participants aged 18 - 90 years from five waves of the NHANES were included in the analysis.

**Outcome measures:** Physical examinations were conducted in mobile examination centers. Body composition, including total body fat percentage, total body fat mass, total lean body mass, appendicular skeletal muscle mass (ASM) and bone mineral density (BMD) were measured by dual energy X-ray absorptiometry.

**Results:** The overall prevalence of sarcopenia ranged from 19.7% in 1999-2000 to 17.4% in 2005-2006 (P for trend=0.78). Sarcopenia in men decreased from 20.9% (95% CI: 18.0, 24.2) to 14.6% (95% CI: 12.2, 17.4) (P for trend=0.36); while in women, it increased from 18.2% to 20.6% (P for trend=0.20). Sarcopenia prevalence was significantly elevated among non-Hispanic blacks, increasing from 1.12% to 26.4% (P for trend < 0.001). Adults aged  $\geq 60$  years old had the highest prevalence, but with a decrease trend over time (P for trend=0.28); while the sarcopenia in people aged less than 40 had raised slightly from 12.5% to 16.6% (P for trend=0.04).

**Conclusions:** The prevalence of sarcopenia has a youth-oriented tendency, and decreased in men but not in women. Non-Hispanic black and non-Hispanic white have reverse tendency.

### Strengths and limitations of this study

- We used the data from nationally representative population-based surveys of the NHANES (1999-2006).
- We aimed to evaluate the prevalence of sarcopenia and found a youth-oriented tendency, and decreased in men but not in women.
- Body composition were measured by dual energy X-ray absorptiometry, which is the golden standard measurement for body composition.
- We only accessed muscle mass data rather than muscle strength which does not reflect muscle power and may be confounded by a third variable that was not involved in this study.
- We used a height adjusted definition of sarcopenia which is potentially problematic in identifying participants with sarcopenic obesity.

## INTRODUCTION

According to the 2010 European Working Group on Sarcopenia in Older People, sarcopenia is defined as a cluster of geriatric conditions characterized by progressive and generalized loss of skeletal muscle mass and strength with a high risk of adverse outcomes including poor quality of life, physical disability, and even death.<sup>1</sup> The prevalence of sarcopenia among adults aged 55 years and older is high, affecting about 30-40% of those in long-term care.<sup>2</sup> It has been conservatively estimated sarcopenia affects more than 50 million people around the world and will increase by more than 200 million over the next 40 years.<sup>3</sup>

Sarcopenia is mainly caused by aging, decreased physical activities,<sup>4</sup> malnutrition<sup>5,6</sup> and endocrine and metabolic disorders.<sup>7</sup> These factors directly contribute to a loss of muscle mass and strength,<sup>8</sup> leading to a higher resting metabolic rate and reduced physical activity which often causes fat gain. The gained fat might mechanically result in a further loss of muscle mass and strength via cytokine protein catabolism<sup>9</sup> and insulin resistance.<sup>10</sup> Thus, sarcopenia and its effects can be part of a spiraling process of declining health.

Obesity and a sedentary lifestyle play key roles in the development of age-related sarcopenia. Recent data reported that obesity is affecting more people at a younger age due to physical inactivity.<sup>11</sup> Therefore, it is reasonable to hypothesize the prevalence of sarcopenia has increased accordingly. Currently, there is a lack of evidence to support this statement. Numerous studies have confirmed that sarcopenia increases the risk of frailty,<sup>12</sup> inflammation,<sup>13,14</sup> liver fibrosis,<sup>15,16</sup> cirrhosis,<sup>17,18</sup> systemic sclerosis,<sup>19</sup> cancer,<sup>20-22</sup> chronic obstructive pulmonary disease,<sup>23</sup> cardiovascular disease (CVD),<sup>24,25</sup> and an elevated risk of mortality,<sup>26</sup> all of which, place considerable health and economic burden on public health care services. Thus, it is important to depict the prevalence and trends of sarcopenia and related body composition over time in relation to sex, age, and race to better inform public health policy and prevention strategies.

1  
2  
3 In this study, we reported the population-based prevalence and time trends of sarcopenia  
4 metrics, related body composition and cardiovascular fitness among adults in the United  
5 States (U.S.) from 1999 to 2006 using data from the National Health and Nutrition  
6 Examination Survey (NHANES).  
7  
8  
9  
10  
11  
12  
13

## 14 **METHODS**

### 15 **Study design and participants**

16  
17  
18 The NHANES is a nationally representative cross-sectional survey among civilian  
19 non-institutionalized persons in the U.S..<sup>27</sup> This analytical study involved participants aged  
20 18 years and older from the NHANES III cohort which ran from 1988-1994, followed by four  
21 consecutive cycles: 1999-2000, 2001-2002, 2003-2004, and 2005-2006. All NHANES  
22 protocols were approved by the National Center for Health Statistics Research ethics review  
23 board. All participants provided written informed consent.  
24  
25  
26  
27  
28  
29  
30  
31

### 32 **Body component measurements and sarcopenia**

33  
34  
35 Physical examinations were conducted in mobile examination centers. Weight in  
36 kilograms, height in centimeters, waist circumference (WC) in centimeters, and heart rate in  
37 beats per minute were measured using standardized techniques and equipment. Body mass  
38 index (BMI) was calculated as weight in kilograms divided by height in meters squared.  
39  
40  
41  
42  
43  
44  
45  
46  
47  
48  
49  
50  
51  
52  
53  
54  
55  
56  
57  
58  
59  
60  
Overweight was defined as a BMI between 25.0-29.9 and obesity as a BMI of 30.0 or  
higher.<sup>28</sup> Central obesity was defined as having a WC of > 102 cm for males and > 88 cm for  
females.<sup>29</sup> Total body fat percentage, total body fat mass, total lean body mass, appendicular  
skeletal muscle mass (ASM) and bone mineral density (BMD) were measured using the dual  
energy X-ray absorptiometry (DXA) in the 1999-2006 surveys. Skeletal muscle mass index  
(SMI) was calculated as ASM divided by height squared (kg/m<sup>2</sup>). Sarcopenia was sex-  
specifically defined as having a SMI of  $\leq 7.26$  kg/m<sup>2</sup> in men and  $\leq 5.5$  kg/m<sup>2</sup> in women.<sup>30</sup>



## Physical activity and social-demographic factors

Participants' sex, age, race, education level, annual household income, time spent watching television per day, and level of physical activity were collected by household interviews. Age was grouped into three categories: 18 to 39 years old, 40 to 59 years old, and 60 years or older. Race was classified as non-Hispanic white, non-Hispanic black, Mexican American and others. Educational level was categorized into < high school graduate, high school graduate/general education development or  $\geq$  college. Time spent watching TV per day was grouped into < 2h, 2–4h, or > 4h. Annual household income was grouped into < \$25000, \$25000 to \$55000, or > \$55000. Physical activity was grouped into two levels: moderate/below, or vigorous.

## Statistical analyses

Participants' characteristics, including sex, age, race, education level, annual household income, time spent watching TV per day and level of physical activity were shown as unweighted frequency and a weighted percentage with a 95% confidence interval. Weighted mean and their 95% confidence intervals of weight, BMI and obesity, WC and central obesity, total body fat percentage, total lean body mass, ASM, SMI, BMD were calculated, and mean changes with 95% confidence intervals (CI) of all these variables from 1999-2000 to 2005-2006 were calculated.

The prevalence of sarcopenia was calculated for five survey cycles from 1999-2000 to 2005-2006 for the overall sample and the subgroups: sex, age group, race, education level, annual household income, time spent watching TV per day, and physical activity level. The interactions between different groups were compared using chi-square tests. The statistical significance of time trends among the overall sample and within the subgroups were assessed by survey-weighted linear (or logistic) regression models with survey year as a continuous

(ordered categorical) variable where appropriate.

Sampling weights were used to account for unequal probabilities of selection and nonresponses for all analyses, thereby providing estimates representative of the civilian, non-institutionalized U.S. population. All statistical analyses were performed using SAS for windows version 9.4 (SAS Institute, Cary, NC, USA). A two-sided  $P < 0.05$  was considered as statistically significant.

### **Patient and public involvement**

There was no patient or public involvement in this study.

## **RESULTS**

There was a total of 14448 participants included in this study, 3,559 from 1999-2000, 4,047 from 2001-2002, 3,771 from 2003-2004, and 3,071 from 2005-2006 (**Table 1**).

Distribution of participants' characteristics in the five survey cycles were comparable. In 1999-2000 ( $n = 9$ ), 49.6% were women, 19.5% were 60 years or older, and 71.7% were Non-Hispanic white. And the proportion of those with a vigorous physical activity level significantly decreased from 1999 to 2006.

Table 1. Participants' characteristics (weighted) of participants from the NHANES surveys, 1999-2006

| Characteristics                                    | No. weighted (%)         |                          |                          |                          |
|----------------------------------------------------|--------------------------|--------------------------|--------------------------|--------------------------|
|                                                    | 1999-2000 (n = 3559)     | 2001-2002 (n = 4047)     | 2003-2004 (n = 3771)     | 2005-2006 (n = 3071)     |
| <b>Sex</b>                                         |                          |                          |                          |                          |
| Men                                                | 1829 (50.4) [48.4, 52.5] | 2106 (50.0) [48.6, 51.3] | 1932 (49.5) [47.5, 51.6] | 1574 (49.7) [48.0, 51.5] |
| Women                                              | 1730 (49.6) [47.5, 51.7] | 1941 (50.0) [48.7, 51.4] | 1839 (50.5) [48.4, 52.6] | 1497 (50.3) [48.5, 52.0] |
| <b>Age group, mean (SD) [95%CI]</b>                | 43.3 (0.5) [42.1, 44.4]  | 43.6 (0.5) [42.5, 44.7]  | 44.2 (0.6) [43.0, 45.4]  | 41.4 (0.4) [40.5, 42.4]  |
| 18 – 39 yrs                                        | 1493 (47.3) [44.7, 49.9] | 1704 (44.0) [39.9, 48.1] | 1592 (42.4) [38.5, 46.3] | 1540 (44.9) [41.9, 47.8] |
| 40 – 59 yrs                                        | 964 (33.2) [31.1, 35.4]  | 1217 (38.2) [34.8, 41.7] | 1015 (38.0) [34.7, 41.3] | 1067 (43.8) [41.6, 46.4] |
| ≥ 60 yrs                                           | 1102 (19.5) [16.9, 22.0] | 1126 (17.8) [16.1, 19.5] | 1164 (19.6) [17.7, 21.5] | 464 (11.3) [9.33, 13.3]  |
| <b>Race</b>                                        |                          |                          |                          |                          |
| Non-Hispanic white                                 | 1513 (71.7) [65.5, 77.9] | 2014 (72.4) [67.5, 77.4] | 1915 (73.2) [65.9, 80.5] | 1321 (71.1) [65.1, 77.1] |
| Non-Hispanic black                                 | 642 (9.5) [6.25, 12.8]   | 785 (10.1) [6.9, 13.2]   | 796 (10.5) [6.6, 14.3]   | 128 (5.1) [3.4, 6.9]     |
| Mexican American                                   | 1082 (6.6) [3.6, 9.5]    | 960 (7.7) [5.7, 9.7]     | 799 (7.7) [3.7, 11.7]    | 746 (8.90) [6.3, 11.5]   |
| Others                                             | 322 (12.2) [5.8, 18.6]   | 288 (9.8) [5.8, 13.9]    | 261 (8.7) [6.3, 11.0]    | 876 (14.8) [10.9, 18.8]  |
| <b>Education level</b>                             |                          |                          |                          |                          |
| < High school graduate                             | 1408 (23.6) [20.4, 26.7] | 1300 (19.2) [17.0, 21.4] | 1114 (17.8) [15.0, 20.5] | 662 (15.5) [11.9, 19.2]  |
| High school graduate/GED                           | 840 (26.4) [22.4, 30.4]  | 980 (25.5) [23.3, 27.7]  | 978 (26.9) [24.7, 29.1]  | 618 (24.5) [22.1, 26.9]  |
| ≥ College                                          | 1302 (50.0) [45.8, 54.2] | 1763 (55.3) [51.9, 58.7] | 1675 (55.3) [52.0, 58.7] | 1363 (60.0) [55.2, 64.9] |
| <b>Family annual income</b>                        |                          |                          |                          |                          |
| < \$25000                                          | 1452 (36.7) [29.6, 43.8] | 1479 (29.7) [27.1, 32.3] | 1518 (30.6) [26.7, 34.3] | 920 (20.9) [17.6, 24.2]  |
| \$25000 – \$55000                                  | 902 (30.8) [26.8, 34.8]  | 1163 (30.9) [27.5, 34.3] | 1081 (32.0) [27.5, 36.5] | 934 (30.6) [27.2, 34.1]  |
| > \$55000                                          | 731 (32.5) [26.7, 38.2]  | 1133 (39.4) [35.6, 43.1] | 958 (37.4) [32.2, 42.7]  | 1097 (48.5) [43.6, 53.5] |
| <b>Watching TV time per day, mean (SD) [95%CI]</b> | 2.34 (0.03) [2.28, 2.41] | 2.31 (0.04) [2.24, 2.39] | 2.16 (0.05) [2.06, 2.27] | 2.07 (0.05) [1.97, 2.17] |
| < 2 h                                              | 621 (19.5) [17.7, 21.6]  | 606 (19.8) [17.9, 21.6]  | 634 (22.0) [19.3, 24.8]  | 545 (22.5) [20.8, 24.2]  |
| 2-4 h                                              | 2072 (68.3) [66.7, 69.9] | 2215 (63.2) [61.4, 65.2] | 2040 (64.7) [61.5, 67.9] | 1674 (66.8) [65.0, 68.5] |
| > 4 h                                              | 428 (12.2) [10.7, 13.8]  | 674 (17.0) [15.6, 18.4]  | 542 (13.3) [10.7, 15.9]  | 354 (10.7) [8.49, 13.0]  |
| <b>Physical activity level</b>                     |                          |                          |                          |                          |
| Moderate or below                                  | 888 (44.0) [40.1, 47.8]  | 1236 (51.0) [47.0, 55.0] | 1451 (61.5) [58.4, 64.6] | 1066 (54.0) [51.0, 57.0] |
| Vigorous                                           | 1013 (56.0) [52.2, 59.9] | 1253 (49.0) [45.0, 53.0] | 963 (38.5) [35.5, 41.6]  | 1027 (46.0) [43.1, 49.0] |

## Prevalence and Trends of Sarcopenia from 1999 to 2006

The overall prevalence of sarcopenia ranged from 19.7% (95% CI: 18.1%, 21.4%) in 1999-2000 to 17.4% (95% CI: 14.9%, 20.2%) in 2005-2006 ( $P$  for trend = 0.78) (Table 2).

The prevalence of sarcopenia in men decreased from 20.9% (95% CI: 18.0%, 24.2%) in 1999-2000 to 14.6% (95% CI: 12.2%, 17.4%) in 2005-2006 ( $P$  for trend = 0.36); while in women, the prevalence went from 18.2% in 1999-2000 to 20.6% in 2005-2006 ( $P$  for trend = 0.20). Sex differences were the largest in 2005-2006, 20.6% for women vs. 14.6% for men ( $P$  < 0.001). There were also racial differences in terms of sarcopenia prevalence as well as over time. It markedly increased from 1.12% in 1999-2000 to 26.4% in 2005-2006 among non-Hispanic blacks ( $P$  for trend < 0.001), but remained stable among non-Hispanic whites (21.7% in 1999-2000, 18.4% in 2005-2006;  $P$  for trend = 0.84) and Mexican Americans (17.1% in 1999-2000, 16.1% in 2005-2006;  $P$  for trend = 0.54) from 1999 to 2006.

Participants aged  $\geq 60$  years had a significantly higher prevalence of sarcopenia in the four survey cycles from 1999-2006 compared to those aged 18–39 years old and 40–59 years old.

In addition, participants who had high education levels, high family annual income, and vigorous physical activity levels were more likely to have relatively lower prevalence of sarcopenia compared to their corresponding lowest categories.

**Table 2. Prevalence (95% CIs) and trends of sarcopenia in the NHANES surveys from 1999 to 2006**

| Characteristics                      | 1999-2000 (n=3550) | 2001-2002 (n=3987) | 2003-2004 (n=3745) | 2005-2006 (n=3062) | P-value for trend # |
|--------------------------------------|--------------------|--------------------|--------------------|--------------------|---------------------|
| <b>Overall</b>                       | 19.7 (18.1, 21.4)  | 19.5 (16.2, 23.5)  | 21.8 (19.4, 24.5)  | 17.4 (14.9, 20.2)  | 0.78                |
| <b>Sex</b>                           |                    |                    |                    |                    |                     |
| <b>Men</b>                           | 20.9 (18.0, 24.2)  | 18.5 (14.5, 23.5)  | 20.9 (17.9, 24.6)  | 14.6 (12.2, 17.4)  | 0.36                |
| <b>Women</b>                         | 18.2 (15.2, 21.7)  | 20.6 (16.7, 25.5)  | 22.8 (19.1, 27.3)  | 20.6 (16.7, 25.4)  | 0.20                |
| <b>P for sex</b>                     | 0.45               | 0.23               | 0.23               | < 0.001            |                     |
| <b>Age group</b>                     |                    |                    |                    |                    |                     |
| <b>18 – 39 yrs</b>                   | 12.5 (9.5, 16.4)   | 15.6 (11.9, 20.4)  | 17.4, (15.6, 20.9) | 16.6 (13.5, 20.3)  | 0.04                |
| <b>40 – 59 yrs</b>                   | 17.6 (14.7, 21.1)  | 13.6 (10.9, 16.9)  | 16.5 (13.1, 20.9)  | 14.3 (12.0, 17.1)  | 0.25                |
| <b>≥ 60 yrs</b>                      | 33.5 (28.8, 39.0)  | 35.1 (26.6, 46.3)  | 36.3 (30.7, 42.9)  | 22.0 (17.3, 27.9)  | 0.28                |
| <b>P for age group</b>               | < 0.001            | < 0.001            | < 0.001            | 0.05               |                     |
| <b>Race</b>                          |                    |                    |                    |                    |                     |
| <b>Non-Hispanic white</b>            | 21.7 (19.4, 24.3)  | 19.5 (16.3, 23.2)  | 22.7 (19.5, 26.5)  | 18.4 (15.7, 21.6)  | 0.84                |
| <b>Non-Hispanic black</b>            | 1.12 (0.42, 2.97)  | 6.52 (4.43, 9.60)  | 7.23 (4.96, 10.5)  | 26.4 (12.9, 54.3)  | < 0.001             |
| <b>Mexican American</b>              | 17.1 (14.4, 20.4)  | 18.3 (15.1, 22.1)  | 20.1 (16.5, 24.6)  | 16.1 (12.2, 21.1)  | 0.54                |
| <b>Others</b>                        | 19.0 (11.7, 30.7)  | 34.6 (21.1, 56.6)  | 37.0 (30.9, 44.3)  | 9.04 (6.17, 13.25) | 0.13                |
| <b>P for Race</b>                    | < 0.001            | < 0.001            | < 0.001            | < 0.001            |                     |
| <b>Education level,</b>              |                    |                    |                    |                    |                     |
| <b>&lt; High school graduate</b>     | 18.8 (14.5, 24.4)  | 20.5 (13.3, 31.6)  | 23.3 (18.8, 28.9)  | 19.1 (14.7, 24.8)  | 0.34                |
| <b>High school graduate or GED</b>   | 19.8 (16.0, 24.6)  | 20.5 (15.6, 27.0)  | 20.4 (17.6, 23.8)  | 16.1 (12.6, 20.6)  | 0.47                |
| <b>≥ College</b>                     | 20.2 (18.2, 22.4)  | 18.2 (15.2, 21.8)  | 21.5 (17.4, 26.4)  | 15.8 (12.8, 19.5)  | 0.59                |
| <b>P for education</b>               | 0.88               | 0.22               | 0.57               | 0.50               |                     |
| <b>Family annual income</b>          |                    |                    |                    |                    |                     |
| <b>&lt; \$25000</b>                  | 21.6 (17.6, 26.6)  | 26.5 (18.8, 37.4)  | 29.7 (25.7, 34.3)  | 19.3 (15.2, 24.4)  | 0.51                |
| <b>\$25000 – \$55000</b>             | 17.5 (14.1, 21.7)  | 19.9 (15.5, 25.7)  | 22.3 (18.1, 27.4)  | 16.4 (12.7, 21.3)  | 0.77                |
| <b>&gt; \$55000</b>                  | 17.6 (14.6, 21.2)  | 12.8 (9.56, 17.1)  | 16.7 (12.3, 22.7)  | 16.7 (12.7, 22.0)  | 0.94                |
| <b>P for income</b>                  | 0.17               | 0.005              | < 0.001            | 0.80               |                     |
| <b>Watching TV time per day</b>      |                    |                    |                    |                    |                     |
| <b>&lt; 2 h</b>                      | 20.9 (14.6, 30.0)  | 19.8 (16.6, 23.6)  | 16.7 (11.8, 23.8)  | 13.5 (8.64, 21.0)  | 0.48                |
| <b>2-4 h</b>                         | 18.6 (16.9, 20.6)  | 20.5 (16.5, 25.4)  | 23.1 (19.7, 27.0)  | 17.0 (13.7, 21.1)  | 0.76                |
| <b>&gt; 4 h</b>                      | 24.5 (16.7, 35.9)  | 20.1 (15.5, 25.9)  | 23.7 (17.4, 32.2)  | 15.8 (22.3, 22.2)  | 0.17                |
| <b>P for watching TV time</b>        | 0.42               | 0.68               | 0.08               | 0.95               |                     |
| <b>Physical activity level</b>       |                    |                    |                    |                    |                     |
| <b>Moderate or below</b>             | 18.6 (16.1, 21.5)  | 23.0 (17.6, 30.0)  | 21.5 (17.9, 25.7)  | 17.4 (13.5, 22.3)  | 0.35                |
| <b>Vigorous</b>                      | 12.2 (9.42, 15.7)  | 13.6 (9.56, 19.4)  | 15.1 (10.0, 22.7)  | 13.2 (8.81, 19.6)  | 0.15                |
| <b>P for physical activity level</b> | 0.001              | < 0.001            | 0.002              | 0.38               |                     |

Sarcopenia was defined according to DIA criteria; GED, general equivalency diploma. #: P-trend (1999-2006): adjusted for sex, age, race, education level, family annual income, watch TV time per day, and physical activity level.

## Body Composition

The average bodyweight across all participants significantly increased from 76.8 kg (95% CI: 75.6, 77.9 kg) in 1999-2000 to 78.9 kg (95% CI: 77.4, 80.4 kg) in 2005-2006 ( $P$  for trend =0.010), an average increase of 2.11 kg (95% CI: 0.28, 3.93 kg) (**Table 3**).

Correspondingly, the prevalence of obesity significantly increased from 24.3% to 29.3% in the overall population, from 20.8% (95% CI: 17.9%, 23.7%) to 27.6% (95% CI: 23.0%, 32.1%) in men ( $P$  for trend=0.007), and from 28.0% (95% CI: 24.2%, 31.9%) to 30.9% (95% CI: 27.4%, 34.5%) in women ( $P$  for trend=0.229), respectively (all  $P$ -values for trend < 0.001 (**Table 3 and Figure 1A**)). After stratification by age (**Figure 1B**), obesity prevalence significantly increased from 21.9% to 24.0% in the 18-39 age group ( $P$  for trend =0.123, from 25.6% to 33.8% in the 40-59 age group ( $P$  for trend=0.027, and from 28.3% to 32.7% in the 60 years or older age group ( $P$  for trend=0.752), respectively. Similar trends of obesity prevalence were observed in non-Hispanic whites (from 23.8% to 28.6%,  $P$  for trend =0.024) and Mexican Americans (from 29.3% to 29.0%,  $P$  for trend = 0.632) but not in non-Hispanic blacks and the others group (**Figure 1C**)). And from 1999-2000 to 2005-2006, We observed a large reduction in ASM and SMI (**Figure 2A**)). Meanwhile, we observed a slight increase in the average waist circumference (**Figure 2B**)), total lean body mass, prevalence of central obesity, and BMD (**Figure 2C**)). The TPF in both non-Hispanic black and others were significantly increased (**Figure 2D**)).

Table 3. Trends of body composition and cardiovascular fitness from 1999 to 2006 in the NHANES surveys

| Characteristics                | Survey cycles     |                   |                   |                   | P-trend # | Mean change from 1999-2000 to 2005-2006 (95% CI) |
|--------------------------------|-------------------|-------------------|-------------------|-------------------|-----------|--------------------------------------------------|
|                                | 1999-2000         | 2001-2002         | 2003-2004         | 2005-2006         |           |                                                  |
| Weight, kg                     | 76.8 (75.6, 77.9) | 76.9 (76.1, 77.7) | 78.3 (77.5, 79.0) | 78.9 (77.4, 80.4) | 0.010     | 2.11 (0.28, 3.93)                                |
| BMI, kg/m <sup>2</sup>         | 26.9 (26.5, 27.3) | 26.8 (26.6, 27.1) | 27.3 (27.0, 27.5) | 27.5 (27.0, 28.0) | 0.016     | 0.59 (-0.01, 1.20)                               |
| Overweight, % †                | 35.5 (32.6, 38.2) | 36.7 (34.2, 39.3) | 35.8 (32.9, 38.6) | 34.1 (32.4, 35.9) | 0.25      | -1.31 (-4.45, 1.83)                              |
| Obesity, % †                   | 24.3 (21.2, 27.4) | 23.7 (21.3, 26.0) | 27.6 (24.7, 30.5) | 29.3 (25.8, 32.7) | 0.023     | 4.92 (0.49, 9.36)                                |
| Waist Circumference, cm        | 92.6 (91.3, 93.9) | 93.0 (92.4, 93.7) | 94.9 (94.3, 95.5) | 94.5 (93.1, 95.9) | <0.001    | 1.90 (0.12, 3.67)                                |
| Central obesity, % †           | 39.9 (35.3, 44.5) | 41.5 (39.3, 43.8) | 47.3 (44.5, 50.2) | 45.1 (41.2, 49.1) | 0.005     | 5.21 (-0.60, 11.0)                               |
| Total body fat percentage, %   | 33.0 (32.4, 33.7) | 32.6 (32.3, 32.9) | 33.5 (33.1, 34.0) | 32.8 (32.3, 33.3) | 0.766     | -0.24 (-1.04, 0.56)                              |
| Total lean body mass, kg       | 49.3 (48.7, 49.8) | 49.6 (49.1, 50.0) | 49.8 (49.3, 50.3) | 50.7 (50.0, 51.5) | <0.001    | 1.45 (0.57, 2.34)                                |
| ASM, kg *                      | 21.7 (21.5, 22.0) | 21.7 (21.4, 22.0) | 21.7 (21.4, 21.9) | 21.9 (21.6, 22.2) | 0.986     | 0.16 (-0.24, 0.56)                               |
| SMI, kg/m <sup>2</sup>         | 7.53 (7.45, 7.61) | 7.50 (7.41, 7.59) | 7.46 (7.38, 7.54) | 7.55 (7.46, 7.64) | 0.958     | 0.02 (-0.09, 0.14)                               |
| BMD, g/cm <sup>2</sup>         | 1.12 (1.11, 1.12) | 1.14 (1.13, 1.14) | 1.15 (1.14, 1.16) | 1.17 (1.16, 1.19) | < 0.001   | 0.06 (0.04, 0.07)                                |
| Heart rate, beats/min          | 187 (186, 187)    | 186 (185, 187)    | 186 (185, 187)    | --                | 0.15      | -0.45 (-1.57, 0.66) <sup>a</sup>                 |
| VO <sub>2</sub> max, ml/kg/min | 40.4 (39.1, 41.8) | 41.0 (40.3, 41.8) | 39.4 (38.6, 40.2) | --                | 0.14      | -1.02 (-2.52, 0.48) <sup>a</sup>                 |
| Low CVD fitness, % †           | 16.7 (12.6, 20.7) | 12.9 (11.0, 14.8) | 19.7 (16.3, 23.0) | --                | 0.51      | 3.03 (-1.99, 8.04) <sup>a</sup>                  |

ASM: skeletal muscle mass, SMI: skeletal muscle index, BMD: bone mineral density; CVD: cardiovascular disease.  
 #: P-trend (1999-2006): adjusted for sex, age, race, education level, family annual income, watch TV time per day, and physical activity level.  
 a: For heart rate, VO<sub>2</sub>max and low CVD fitness, the changes were from 1999-2000 to 2003-2004.  
 All statistics were weighted and shown as mean (95% confidence interval) or † percentage (95% confidence interval).  
 --: Not available.

## DISCUSSION

Using nearly 20 years of nationally representative U.S. data from NHANES, we found the overall prevalence of sarcopenia remained stable between 1999 and 2006. However, stratification analyses revealed sarcopenia increased considerably among non-Hispanic blacks from 1999 to 2006. Obesity and central obesity significantly increased from 1999 to 2006. As anticipated, sarcopenia and its metrics increased accordingly in young people.

Sarcopenia and obesity have common environmental risk factors, including over-nutrition, metabolic disorders, and a sedentary lifestyle.<sup>31</sup> Obesity can lead directly to loss of muscle mass and strength,<sup>32</sup> and is commonly accompanied with a reduction in physical activity and the promotion of metabolic disorders, which in turn, accelerates abnormal distribution of fat mass and initiates the process of sarcopenia.<sup>33</sup> Our study reveals an increasing trend in obesity prevalence across all three age groups. A significant elevation in the prevalence of sarcopenia from 1999 to 2006 was observed in the young (18-39 years) age group. The peak period of skeletal muscle mass is around 20 years old which begins to decrease at around 30 years old.<sup>34</sup> The peak period of muscle strength lags nearly 10-years behind the peak period of muscle mass and starts to decline at around 50 years old.<sup>35</sup> The speed of declination of muscle strength is 2 to 5 times faster than that of muscle mass over the same period of time.<sup>36</sup> However, it is still unclear whether muscle mass reduction at a young age would further accelerate muscle strength loss and ageing related health issues. Observational studies reported a linearly positive association between muscle mass and strength in both middle aged and elderly people.<sup>37-39</sup> This indicates the higher the amount of muscle mass acquired during a young age may protect adults from the early onset of sarcopenia. Therefore, it may be beneficial for prevention and intervention strategies to pay more attention to increasing muscle mass in both young and old populations.

We did not observe significant sex differences over time in relation to sarcopenia



1  
2  
3 prevalence. From 1999 to 2006, sarcopenia prevalence decreased in men but not in women.  
4  
5 Previous evidence is controversial and inconsistent. Michele *et al.* compared 195 women  
6  
7 aged 64 to 93 years old and 142 men aged 64 to 92 years old, they found a higher prevalence  
8  
9 of sarcopenia in men than in women;<sup>40</sup> while in the Fifth Korea National Health and Nutrition  
10  
11 Examination Survey, sarcopenia was more prevalent in women.<sup>41</sup> Women have less absolute  
12  
13 and relative muscle mass than men<sup>42</sup> in biology. Besides natural differences in skeletal  
14  
15 muscle between men and women, such as the amount of muscle mass, muscle capillary  
16  
17 density, and muscle fiber type,<sup>43</sup> physical activity might be a potential cause for sex  
18  
19 differences in sarcopenia prevalence.<sup>44</sup> In our study, most women had lower self-reported  
20  
21 levels of physical activity than men. The amount of physical activity in men gradually  
22  
23 increased, whereas it decreased in women over time. Another critical factor is age-related  
24  
25 changes in the gonadal function and sex hormones regulating muscle mass distribution.  
26  
27 Evidence suggested lower serum testosterone levels in elderly men contributes to muscle  
28  
29 weakness.<sup>45</sup> Men experience a gradual decrease in knee extensor and handgrip strength  
30  
31 between 20 and 80 years of age, whereas, women experience a steep decline after the age of  
32  
33 55 (menopausal age).<sup>46 47</sup> Although it is not clear whether age-related changes in the gonadal  
34  
35 function directly regulate physical activity in humans, animals after gonadectomy can cause a  
36  
37 dramatical decline in spontaneous physical activity.<sup>48</sup> Thus, sex differences might be pivotal  
38  
39 in understanding the process of sarcopenia and aging, understanding why each sex remains  
40  
41 “muscle healthy” throughout their lifespan could open new avenues to prevent and treat  
42  
43 sarcopenia and the ageing process.  
44  
45  
46  
47  
48  
49

50  
51 We also detected an increased trend of sarcopenia prevalence, from 1.12% in 1999 to  
52  
53 26.4% in 2006, in non-Hispanic black people, while the prevalence was stable in non-  
54  
55 Hispanic Whites, Mexican Americans and other racial groups over time. Racial differences in  
56  
57 muscle mass have been reported in previous studies. Evidence has shown African-Americans  
58  
59  
60

1  
2  
3 have significantly higher skeletal muscle/adipose tissue-free body mass ratio than other races,  
4  
5 although the difference was very small.<sup>49</sup> Mahbubur and Abbey reported black women had  
6  
7 greater levels of total and regional lean mass than White and Hispanic women, while  
8  
9 Hispanic women had even lower values than white women after assessment of body  
10  
11 composition of 708 healthy black, white, and Hispanic women aged 16–33 years using DXA  
12  
13 analysis.<sup>50</sup> According to the NHANES III bioelectrical impedance data, the amount of fat-free  
14  
15 mass in Mexican-Americans was lower than in non-Hispanic Blacks, which was lower than  
16  
17 in non-Hispanic Whites.<sup>51</sup> The underlying mechanism of racial differences is still unclear and  
18  
19 warrants further investigation.  
20  
21  
22

23  
24 There are several limitations of this study. First, we only accessed muscle mass data  
25  
26 rather than muscle strength which does not reflect muscle power and may be confounded by a  
27  
28 third variable that was not involved in this study. Second, the prevalence of sarcopenia in  
29  
30 women may be underestimated because we used a height adjusted definition of sarcopenia<sup>52</sup>  
31  
32 which is potentially problematic in identifying participants with sarcopenic obesity.<sup>53</sup>  
33  
34 However, if we had used the weight-adjusted definition, people classified as having  
35  
36 sarcopenia would have had higher BMI values compared with those without sarcopenia.<sup>54</sup>  
37  
38 Third, physical activity data was self-reported therefore bias may be a factor. Recent research  
39  
40 on self-reported levels of physical activity indicated individuals in the U.S. tended to have  
41  
42 differing perceptions of activity levels, overestimating their time spent exercising compared  
43  
44 to Europeans.<sup>55</sup> Future studies should apply objective measures to muscle strength and  
45  
46 physical activity to accurately evaluate sarcopenia prevalence.  
47  
48  
49  
50  
51  
52

## 53 CONCLUSIONS

54  
55  
56 Using data from the representative NHANES surveys covering nearly 20 years of data  
57  
58 from 1999 to 2006, there was a youth-oriented tendency of prevalence of sarcopenia from  
59  
60

1  
2  
3 1999 to 2006 among U.S. adults. Sarcopenia prevalence significantly decreased in men but  
4  
5 not in women from 1999 to 2006. Together with an increase in obesity and central obesity,  
6  
7 elevations of sarcopenia in non-Hispanic blacks and young people were observed. It is  
8  
9 recommended to control body fat ratio and develop good habit of keeping resistant and  
10  
11 moderate physical activity to prevent sarcopenia both for young and elderly people. The  
12  
13 continued high prevalence of sarcopenia and obesity is an important public health concern.  
14  
15  
16  
17  
18  
19  
20  
21  
22  
23  
24  
25  
26  
27  
28  
29  
30  
31  
32  
33  
34  
35  
36  
37  
38  
39  
40  
41  
42  
43  
44  
45  
46  
47  
48  
49  
50  
51  
52  
53  
54  
55  
56  
57  
58  
59  
60

For peer review only

## **Acknowledgements**

We would like to thank Mr. Christopher Lavender for the discussion on the manuscript.

## **Contributors**

JL and XZ designed and conducted the research; JL and XZ analyzed data; JL, XZ, YW and DG are responsible for the final content of the manuscript; all authors took part in writing the manuscript, read and approved the final version.

## **Funding**

The project described was supported by NSFC (Natural Science Foundation of China, No.: 81703238) (Dr. Zhang and Dan-Tong Gu).

## **Competing interests**

No declared.

## **Patient consent for publication**

Not required.

## **Provenance and peer review**

Not commissioned; externally peer reviewed.

## **Ethics approval**

All NHANES protocols were approved by the National Center for Health Statistics Research ethics review board.

## **Data availability statement**

The data link is <https://www.cdc.gov/nchs/nhanes/index.htm>.

## REFERENCES

1. Cruz-Jentoft AJ, Baeyens JP, Bauer JM, et al. Sarcopenia: European consensus on definition and diagnosis: Report of the European Working Group on Sarcopenia in Older People. *Age and Ageing* 2010;39:412-423.
2. Hashemi R, Shafiee G, Motlagh AD, et al. Sarcopenia and its associated factors in Iranian older individuals: Results of SARIR study. *Arch Gerontol Geriatr* 2016;66:18-22.
3. Santilli V, Bernetti A, Mangone M, et al. Clinical definition of sarcopenia. *Clin Cases Miner Bone Metab* 2014;11:177-80.
4. Provan M, Mander T. Mobility, exercise, nutrition and healthy ageing to avoid sarcopenia. *Post Reprod Health* 2018;24(2):98-102.
5. Lynch GS, Koopman R. Dietary meat and protection against sarcopenia. *Meat Sci* 2018
6. Lee SG, Lee YH, Kim KJ, et al. Additive association of vitamin D insufficiency and sarcopenia with low femoral bone mineral density in noninstitutionalized elderly population: the Korea National Health and Nutrition Examination Surveys 2009-2010. *Osteoporos Int* 2013;24(11):2789-99.
7. Wakabayashi H, Sakuma K. Comprehensive approach to sarcopenia treatment. *Curr Clin Pharmacol* 2014;9(2):171-80.
8. Fry CS, Lee JD, Mula J, et al. Inducible depletion of satellite cells in adult, sedentary mice impairs muscle regenerative capacity without affecting sarcopenia. *Nat Med*. 2015;21(1):76-80.
9. Campos F, Abrigo J, Aguirre F, et al. Sarcopenia in a mice model of chronic liver disease: role of the ubiquitin-proteasome system and oxidative stress. *Pflugers Arch* 2018
10. Roubenoff R. Sarcopenic obesity: does muscle loss cause fat gain? Lessons from rheumatoid arthritis and osteoarthritis. *Ann N Y Acad Sci* 2000;904:553-7.
11. Chen YC, Tu YK, Huang KC, et al. Pathway from central obesity to childhood asthma. Physical fitness and sedentary time are leading factors. *Am J Respir Crit Care Med* 2014;189(10):1194-203.
12. Calvani R, Marini F, Cesari M, et al. Biomarkers for physical frailty and sarcopenia: state of the science and future developments. *J Cachexia Sarcopenia Muscle* 2015;6(4):278-86
13. Kim SE. Clinical Implication of Sarcopenia in Patients with Inflammatory Bowel Disease. *Korean J Gastroenterol* 2018;71(6):308-14.
14. Ryan E, McNicholas D, Creavin B, et al. Sarcopenia and Inflammatory Bowel Disease: A Systematic Review. *Inflamm Bowel Dis* 2019;1;25(1):67-73.
15. Han E, Lee YH, Kim BK, et al. Sarcopenia is associated with the risk of significant liver fibrosis in metabolically unhealthy subjects with chronic hepatitis B. *Aliment Pharmacol Ther* 2018;48(3):300-312.
16. Hanai T, Shiraki M, Nishimura K, et al. Sarcopenia impairs prognosis of patients with liver cirrhosis. *Nutrition* 2015;31(1):193-99.
17. Moctezuma-Velazquez C, Low G, Mourtzakis M, et al. Association between Low Testosterone Levels and Sarcopenia in Cirrhosis: A Cross-sectional Study. *Ann Hepatol* 2018;17(4):615-23.
18. Bhanji RA, Moctezuma-Velazquez C, Duarte-Rojo A, et al. Myosteatorsis and sarcopenia are associated with hepatic encephalopathy in patients with cirrhosis. *Hepatol Int* 2018;12(4):377-386.
19. Siegert E, March C, Otten L, et al. Prevalence of sarcopenia in systemic sclerosis: Assessing body composition and functional disability in patients with systemic sclerosis. *Nutrition* 2018;55-56:51-55.

20. Miyamoto Y, Baba Y, Sakamoto Y, et al. Sarcopenia is a Negative Prognostic Factor After Curative Resection of Colorectal Cancer. *Ann Surg Oncol* 2015;22(8):2663-68.
21. Voron T, Tselikas L, Pietrasz D, et al. Sarcopenia Impacts on Short- and Long-term Results of Hepatectomy for Hepatocellular Carcinoma. *Ann Surg* 2015;261(6):1173-83.
22. Joglekar S, Asghar A, Mott SL, et al. Sarcopenia Is an Independent Predictor of Complications Following Pancreatectomy for Adenocarcinoma. *J Surg Oncol* 2015;111(6):771-75.
23. Jones SE, Maddocks M, Kon SSC, et al. Sarcopenia in COPD: prevalence, clinical correlates and response to pulmonary rehabilitation. *Thorax* 2015;70(3):213-18.
24. Chin SO, Rhee SY, Chon S, et al. Sarcopenia is independently associated with cardiovascular disease in older Korean adults: the Korea National Health and Nutrition Examination Survey (KNHANES) from 2009. *PLoS one* 2013;8(3):e60119.
25. Atkins JL, Whincup PH, Morris RW, et al. Sarcopenic obesity and risk of cardiovascular disease and mortality: a population-based cohort study of older men. *J Am Geriatr Soc* 2014;62(2):253-60.
26. Kim YK, Lee HS, Ryu JJ, et al. Sarcopenia increases the risk for mortality in patients who undergo amputation for diabetic foot. *J Foot Ankle Res* 2018;11:32.
27. Plan and operation of the Third National Health and Nutrition Examination Survey, 1988-94. Series 1: programs and collection procedures. *Vital Health Stat 1* 1994(32):1-407.
28. Flegal KM, Carroll MD, Kit BK, et al. Prevalence of obesity and trends in the distribution of body mass index among US adults, 1999-2010. *JAMA* 2012;307(5):491-7.
29. Obesity: Preventing and managing the global epidemic: Report of a WHO consultation on obesity. *World Health Organ Tech Rep Ser* 2000;894:i-xii, 1-253.
30. Cruz-Jentoft AJ, Baeyens JP, Bauer JM, et al. Sarcopenia: European consensus on definition and diagnosis: Report of the European Working Group on Sarcopenia in Older People. *Age Ageing* 2010;39(4):412-23.
31. Choi B, Schnall PL, Yang H, et al. Sedentary work, low physical job demand, and obesity in US workers. *Am J Ind Med* 2010;53(11):1088-101.
32. Wannamethee SG, Atkins JL. Muscle loss and obesity: the health implications of sarcopenia and sarcopenic obesity. *Proc Nutr Soc* 2015;74(4):405-12.
33. Cleasby ME, Jamieson PM, Atherton PJ. Insulin resistance and sarcopenia: mechanistic links between common co-morbidities. *J Endocrinol* 2016;229(2):R67-81.
34. McLean R, Samelson LJ, Lorbergs A, et al. Greater peri-aortic adipose tissue is associated with increased trunk muscle fat in men and women. 2017.
35. Silva AM, Shen W, Heo M, et al. Ethnicity-Related Skeletal Muscle Differences Across the Lifespan. *Am J Hum Biol* 2010;22(1):76-82.
36. Delmonico MJ, Harris TB, Visser M, et al. Longitudinal study of muscle strength, quality, and adipose tissue infiltration. *Am J Clin Nutr* 2009;90(6):1579-85.
37. Newman AB, Haggerty CL, Goodpaster B, et al. Strength and muscle quality in a well-functioning cohort of older adults: the Health, Aging and Body Composition Study. *J Am Geriatr Soc* 2003;51(3):323-30.
38. Rolland Y, Czerwinski S, Abellan Van Kan G, et al. Sarcopenia: its assessment, etiology, pathogenesis, consequences and future perspectives. *J Nutr Health Aging* 2008;12(7):433-50.
39. Goodpaster BH, Park SW, Harris TB, et al. The loss of skeletal muscle strength, mass, and quality in older adults: the health, aging and body composition study. *J Gerontol A Biol Sci Med Sci* 2006;61(10):1059-64.



- 1
- 2
- 3
- 4 40. Iannuzzi-Sucich M, Prestwood KM, Kenny AM. Prevalence of sarcopenia and predictors
- 5 of skeletal muscle mass in healthy, older men and women. *J Gerontol A Biol Sci Med*
- 6 *Sci* 2002;57(12):M772-M777.
- 7 41. Hong N, Lee EY, Kim CO. Gamma-glutamyl transferase is associated with sarcopenia
- 8 and sarcopenic obesity in community-dwelling older adults: results from the Fifth
- 9 Korea National Health and Nutrition Examination Survey, 2010-2011. *Endocr J*
- 10 2015;62(7):585-92.
- 11 42. Marcellino C, Henn RL, Olinto MT, et al. Physical inactivity and associated factors
- 12 among women from a municipality in southern Brazil. *J Phys Act Health*
- 13 2014;11(4):777-83.
- 14 43. Kim J. Gender difference in association between appendicular skeletal muscle mass and
- 15 cardiometabolic abnormalities in normal-weight and obese adults: Korea National
- 16 Health and Nutrition Examination Survey (KNHANES) IV-3 and V-1. *Asia Pac J*
- 17 *Public Health* 2015;27(2):Np468-75.
- 18 44. Genton L, Karsegard VL, Chevalley T, et al. Body composition changes over 9 years in
- 19 healthy elderly subjects and impact of physical activity. *Clin Nutr* 2011;30(4):436-42.
- 20 45. Doherty TJ. Invited review: Aging and sarcopenia. *J Appl Physiol* (1985)
- 21 2003;95(4):1717-27.
- 22 46. Samson MM, Meeuwse IB, Crowe A, et al. Relationships between physical performance
- 23 measures, age, height and body weight in healthy adults. *Age Ageing* 2000;29(3):235-
- 24 42.
- 25 47. Phillips SK, Rook KM, Siddle NC, et al. Muscle weakness in women occurs at an earlier
- 26 age than in men, but strength is preserved by hormone replacement therapy. *Clin Sci*
- 27 *(Lond)* 1993;84(1):95-8.
- 28 48. Rosenfeld CS. Sex-dependent differences in voluntary physical activity. *J Neurosci Res*
- 29 2017;95(1-2):279-90.
- 30 49. Wang Z, Heo M, Lee RC, et al. Muscularity in adult humans: proportion of adipose
- 31 tissue-free body mass as skeletal muscle. *Am J Hum Biol* 2001;13(5):612-9.
- 32 50. Rahman M, Berenson AB. Racial difference in lean mass distribution among
- 33 reproductive-aged women. *Ethn Dis* 2010;20(4):346-52.
- 34 51. Chumlea WC, Guo SS, Kuczmarski RJ, et al. Body composition estimates from
- 35 NHANES III bioelectrical impedance data. *Int J Obes Relat Metab Disord*
- 36 2002;26(12):1596-609.
- 37 52. Meng NH, Li CI, Liu CS, et al. Comparison of height- and weight-adjusted sarcopenia in
- 38 a Taiwanese metropolitan older population. *Geriatr Gerontol Int* 2015;15(1):45-53.
- 39 53. Kim YS, Lee Y, Chung YS, et al. Prevalence of sarcopenia and sarcopenic obesity in the
- 40 Korean population based on the Fourth Korean National Health and Nutritional
- 41 Examination Surveys. *J Gerontol A Biol Sci Med Sci* 2012;67(10):1107-13.
- 42 54. Janssen I, Heymsfield SB, Ross R. Low relative skeletal muscle mass (sarcopenia) in
- 43 older persons is associated with functional impairment and physical disability. *J Am*
- 44 *Geriatr Soc* 2002;50(5):889-96.
- 45 55. Kapteyn A, Banks J, Hamer M, et al. What they say and what they do: comparing
- 46 physical activity across the USA, England and the Netherlands. *J Epidemiol*
- 47 *Community Health* 2018;72(6):471-76.
- 48
- 49
- 50
- 51
- 52
- 53
- 54
- 55
- 56
- 57
- 58
- 59
- 60

## Figure Legends

**Figure 1.** Prevalence of obesity stratified by sex (A), age (B) and race groups (C) from 1988 to 2006 in the NHANES surveys

**Figure 2.** Distribution of body compositions, including SMI (A), WC (B), BMD (C), and TPF (D) by sex, age and race group from 1999 to 2006

For peer review only



1  
2  
3  
4  
5  
6  
7  
8  
9  
10  
11  
12  
13  
14  
15  
16  
17  
18  
19  
20  
21  
22  
23  
24  
25  
26  
27  
28  
29  
30  
31  
32  
33  
34  
35  
36  
37  
38  
39  
40  
41  
42  
43  
44  
45  
46  
47  
48  
49  
50  
51  
52  
53  
54  
55  
56  
57  
58  
59  
60

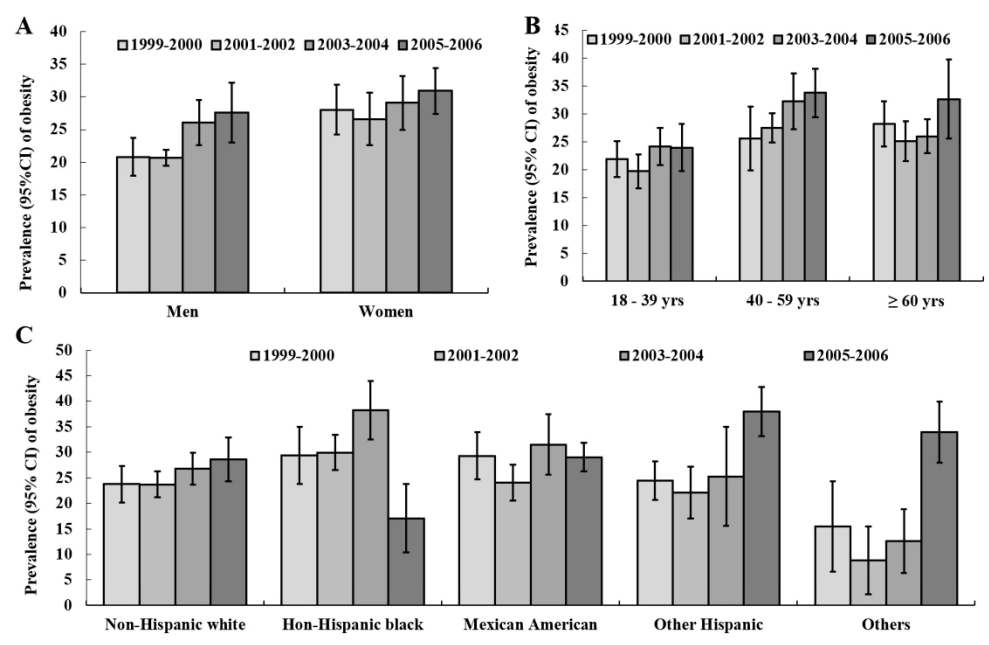

Prevalence of obesity stratified by sex (A), age (B) and race groups (C) from 1988 to 2006 in the NHANES surveys

382x255mm (200 x 200 DPI)

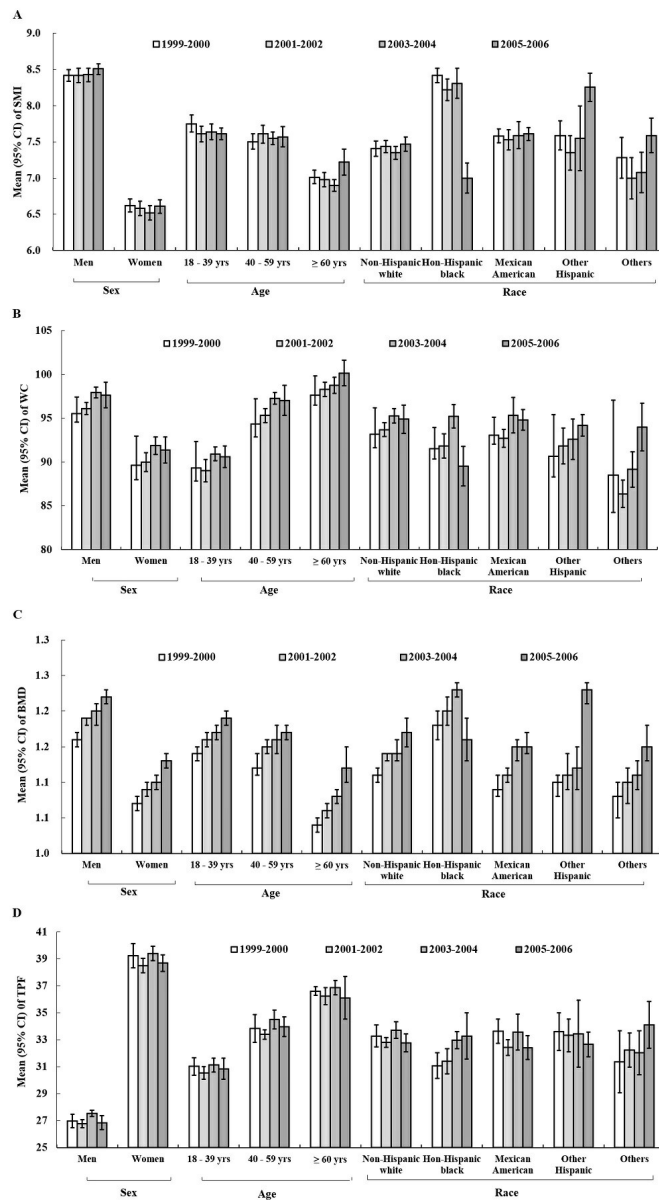

Distribution of body compositions, including SMI (A), WC (B), BMD (C), and TPF (D) by sex, age and race group from 1999 to 2006

127x226mm (200 x 200 DPI)

# BMJ Open

## Prevalence and Temporal Trends of Pre-sarcopenia Metrics and Related Body Compositions from a longitudinal data of 1999-2006 NHANES survey

|                                 |                                                                                                                                                                                                                                                                                                                                                                                                                                                                                                                                                                                        |
|---------------------------------|----------------------------------------------------------------------------------------------------------------------------------------------------------------------------------------------------------------------------------------------------------------------------------------------------------------------------------------------------------------------------------------------------------------------------------------------------------------------------------------------------------------------------------------------------------------------------------------|
| Journal:                        | <i>BMJ Open</i>                                                                                                                                                                                                                                                                                                                                                                                                                                                                                                                                                                        |
| Manuscript ID                   | bmjopen-2019-034495.R1                                                                                                                                                                                                                                                                                                                                                                                                                                                                                                                                                                 |
| Article Type:                   | Original research                                                                                                                                                                                                                                                                                                                                                                                                                                                                                                                                                                      |
| Date Submitted by the Author:   | 26-Feb-2020                                                                                                                                                                                                                                                                                                                                                                                                                                                                                                                                                                            |
| Complete List of Authors:       | Li, Jibin; Sun Yat-sen University Cancer Center, Department of Clinical Research; Sun Yat-sen University State Key Laboratory of Oncology in South China<br>Wu, Yuwan; Xinhua Hospital Affiliated to Shanghai Jiaotong University School of Medicine<br>Gu, Dantong; Fudan University School of Public Health, Department of Bio-statistics<br>Li, Huajun; Xinhua Hospital Affiliated to Shanghai Jiaotong University School of Medicine, Department of Pediatrics<br>Zhang, Xi; Xinhua Hospital Affiliated to Shanghai Jiaotong University School of Medicine, Clinical Research Unit |
| <b>Primary Subject Heading</b>: | Epidemiology                                                                                                                                                                                                                                                                                                                                                                                                                                                                                                                                                                           |
| Secondary Subject Heading:      | Epidemiology                                                                                                                                                                                                                                                                                                                                                                                                                                                                                                                                                                           |
| Keywords:                       | Body Composition, PUBLIC HEALTH, EPIDEMIOLOGY                                                                                                                                                                                                                                                                                                                                                                                                                                                                                                                                          |
|                                 |                                                                                                                                                                                                                                                                                                                                                                                                                                                                                                                                                                                        |

SCHOLARONE™  
Manuscripts



I, the Submitting Author has the right to grant and does grant on behalf of all authors of the Work (as defined in the below author licence), an exclusive licence and/or a non-exclusive licence for contributions from authors who are: i) UK Crown employees; ii) where BMJ has agreed a CC-BY licence shall apply, and/or iii) in accordance with the terms applicable for US Federal Government officers or employees acting as part of their official duties; on a worldwide, perpetual, irrevocable, royalty-free basis to BMJ Publishing Group Ltd ("BMJ") its licensees and where the relevant Journal is co-owned by BMJ to the co-owners of the Journal, to publish the Work in this journal and any other BMJ products and to exploit all rights, as set out in our [licence](#).

The Submitting Author accepts and understands that any supply made under these terms is made by BMJ to the Submitting Author unless you are acting as an employee on behalf of your employer or a postgraduate student of an affiliated institution which is paying any applicable article publishing charge ("APC") for Open Access articles. Where the Submitting Author wishes to make the Work available on an Open Access basis (and intends to pay the relevant APC), the terms of reuse of such Open Access shall be governed by a Creative Commons licence – details of these licences and which [Creative Commons](#) licence will apply to this Work are set out in our licence referred to above.

Other than as permitted in any relevant BMJ Author's Self Archiving Policies, I confirm this Work has not been accepted for publication elsewhere, is not being considered for publication elsewhere and does not duplicate material already published. I confirm all authors consent to publication of this Work and authorise the granting of this licence.

1  
2  
3 1 **Prevalence and Temporal Trends of Pre-sarcopenia Metrics and Related Body**  
4  
5 2 **Compositions from a longitudinal data of 1999-2006 NHANES survey**  
6  
7

8 3 Ji-Bin Li <sup>1</sup>, Yu-Wan Wu <sup>2</sup>, Dan-Tong Gu <sup>3</sup>, Hua-Jun Li <sup>2\*</sup>, Xi Zhang <sup>4\*</sup>  
9

10 4 **Affiliations:**

- 11  
12  
13 5 1. Department of Clinical Research, Sun Yat-sen University Cancer Center; State Key  
14 Laboratory of Oncology in Southern China; Collaborative Innovation Center for  
15 6 Cancer Medicine, Guangzhou 510060, China.  
16  
17 7  
18 8 2. Department of Pediatrics, Xin Hua Hospital, Shanghai Jiao Tong University  
19 School of Medicine, Shanghai, China  
20  
21 9  
22 10 3. Department of Bio-statistics, School of Public Health, Fudan University, Shanghai,  
23 China.  
24 11  
25 12 4. Clinical Research Unit, Xin Hua Hospital, Shanghai Jiao Tong University School of  
26 13 Medicine, Shanghai, China.  
27  
28  
29  
30  
31  
32  
33  
34  
35  
36  
37  
38  
39  
40  
41  
42  
43  
44  
45  
46  
47  
48  
49  
50  
51  
52  
53  
54  
55  
56  
57  
58  
59  
60

15 **Short title:** Trends of Pre-sarcopenia Metrics among U.S. Adults

16 \* Corresponding author

17 **Correspondence to**

18 Xi Zhang, PhD

19 Clinical Research Unit, Xin Hua Hospital, Shanghai Jiao Tong University School of  
20 Medicine, 1665 Kongjiang Road, Kejiao Building 233B, Shanghai, China 200092.

21 Tel: +86-021-2507-7482;

22 Fax: +86-021-2507-7480;

23 E-mail: zhangxi@xinquamed.com.cn

24  
25 Huajun Li, PhD

1  
2  
3  
4  
5  
6  
7  
8  
9  
10  
11  
12  
13  
14  
15  
16  
17  
18  
19  
20  
21  
22  
23  
24  
25  
26  
27  
28  
29  
30  
31  
32  
33  
34  
35  
36  
37  
38  
39  
40  
41  
42  
43  
44  
45  
46  
47  
48  
49  
50  
51  
52  
53  
54  
55  
56  
57  
58  
59  
60

26 Department of Pediatrics, Xin Hua Hospital, Shanghai Jiao Tong University School of  
27 Medicine, No. 1665 Kongjiang Road, Shanghai, China 200092.

28 Tel: +86-021-2507-6794;  
29 E-mail: lihuajun@xinquamed.com.cn

31 **Word count:** 2827

For peer review only

## 32 Abstract

33 **Objective:** Evaluate the prevalence and temporal trends of pre-sarcopenia and related body  
34 compositions.

35 **Study design and Setting:** This is an analysis study of the longitudinal data from 1999-2006  
36 National Health and Nutrition Examination Survey (NHANES).

37 **Methods:** Presarcopenia was defined according to the European Working Group on  
38 Sarcopenia. Logistic or linear regression models were used to evaluate the linear trend of the  
39 prevalence of presarcopenia, obesity, and related body compositions.

40 **Participants:** A total of 29,947 participants aged 18 - 90 years from five waves of the  
41 NHANES were included in the analysis.

42 **Outcome measures:** Pre-sarcopenia was sex-specifically defined as having a skeletal mass  
43 index  $\leq 7.26$  kg/m<sup>2</sup> in men and  $\leq 5.5$  kg/m<sup>2</sup> in women. Body compositions, including total  
44 body fat percentage, total body fat mass, total lean body mass, appendicular skeletal muscle  
45 mass (ASM) and bone mineral density (BMD) were measured by dual energy X-ray  
46 absorptiometry.

47 **Results:** The overall prevalence of pre-sarcopenia ranged from 16.4% in 1999-2000 to 14.8%  
48 in 2005-2006 (*P* for trend=0.78). Pre-sarcopenia were stable in both males (*P* for trend=0.36)  
49 and females (*P* for trend=0.20). Pre-sarcopenia prevalence was significantly elevated among  
50 18 – 39 years age group (from 11.3% to 14.1%, *P* for trend = 0.04) and among non-Hispanic  
51 blacks (from 6.2% to 20.6%, *P* for trend < 0.001). Adults aged  $\geq 80$  years old had the  
52 highest prevalence.

53 **Conclusions:** The prevalence of pre-sarcopenia has a trend toward youth, and remained  
54 stable over time. Non-Hispanic black has an increasing trend over time.

55 **Keywords:** Pre-sarcopenia Metrics; Body Composition; Temporal Trends.

56

1  
2  
3 57 **Strengths and limitations of this study**  
4

- 5 58 • We used the longitudinal data from nationally representative population-based surveys of  
6  
7  
8 59 the NHANES (1999-2006).  
9  
10 60 • Body composition were measured by the golden standard of dual energy X-ray  
11  
12 61 absorptiometry.  
13  
14 62 • Appendicular skeletal muscle mass rather than muscle strength and physical performance  
15  
16  
17 63 was assessed.  
18  
19 64 • The prevalence of pre-sarcopenia in women may be underestimated when used a height  
20  
21 65 adjusted definition of pre-sarcopenia.  
22  
23  
24 66 • Reporting bias may exist due to self-reported physical activity data.  
25  
26  
27  
28  
29 68  
30  
31 69  
32  
33 70  
34  
35  
36  
37  
38  
39  
40  
41  
42  
43  
44  
45  
46  
47  
48  
49  
50  
51  
52  
53  
54  
55  
56  
57  
58  
59  
60



## 71 INTRODUCTION

72 According to the 2010 European Working Group on Sarcopenia in Older People  
73 (EWGSOP), sarcopenia is defined as a cluster of geriatric conditions characterized by  
74 progressive and generalized loss of skeletal muscle mass and strength with a high risk of  
75 adverse outcomes including poor quality of life, physical disability, and even death.[1] The  
76 prevalence of pre-sarcopenia (52.7% in men and 25.3% in female) and sarcopenia (20.7% in  
77 men and 15.3% in female) among adults aged 55 years and older are high, affecting about 30-  
78 40% of those in long-term care.[2] It has been conservatively estimated that sarcopenia affects  
79 more than 50 million people around the world and will increase by more than 200 million over  
80 the next 40 years.[3]

81 Currently, there is a variety of but no consensus definition for sarcopenia, and its  
82 prevalence is highly dependent on the diagnostic criteria used in the study. Among all three  
83 components of sarcopenia based on EWGSOP, muscle mass, muscle strength, and performance,  
84 muscle mass play a critical role in the progress of sarcopenia, and low muscle mass has been  
85 identified as pre-sarcopenia. Sarcopenia, especially low skeletal muscle is mainly caused by  
86 aging, decreased physical activities,[4] malnutrition,[5-6] and endocrine and metabolic  
87 disorders.[7] These factors directly contribute to a loss of muscle mass,[8] influencing the  
88 muscle strength and performance, leading to a lower metabolic rate and reduced physical  
89 activity which often causes fat gain. The gained fat might mechanically result in a further loss  
90 of muscle mass and strength via cytokine protein catabolism[9] and insulin resistance.[10] Thus,  
91 sarcopenia and its effects can be part of a spiraling process of declining health.

92 Obesity and sedentary lifestyle play key roles in the development of age-related muscle  
93 reduce. Sarcopenic obesity, defined as lose in lean body mass but preservation or even increase  
94 in body fat mass, is one of the conditions which has serious health implications. Recent data  
95 reported that obesity is affecting more people at a younger age due to physical inactivity.[11]

1  
2  
3 96 Therefore, it is reasonable to hypothesize that the prevalence of pre-sarcopenia has increased  
4  
5 97 accordingly. Currently, there is a lack of evidence to support this statement. Numerous studies  
6  
7  
8 98 have confirmed that sarcopenia increases the risk of frailty,[12] inflammation ,[13 14] liver  
9  
10 99 fibrosis,[15 16] cirrhosis,[17 18] systemic sclerosis,[19] cancer,[20-22] chronic obstructive  
11  
12 100 pulmonary disease,[23] cardiovascular disease (CVD),[24 25] and mortality,[26] all of which  
13  
14 101 place considerable health and economic burden on public health care services. Thus, it is  
15  
16 102 important to depict the prevalence and trends of pre-sarcopenia and related body compositions  
17  
18 103 over time in relation to sex, age, and race to better inform public health policy and prevention  
19  
20 104 strategies.

21  
22  
23  
24 105 In this study, we estimated the population-based prevalence and temporal trends of pre-  
25  
26 106 sarcopenia metrics and related body compositions among adults in the United States (U.S.)  
27  
28 107 from 1999 to 2006 using data from the National Health and Nutrition Examination Survey  
29  
30 108 (NHANES).

## 31 109 32 33 34 35 110 **METHODS**

### 36 37 111 **Study design and participants**

38  
39 112 The NHANES is a nationally representative cross-sectional survey among civilian non-  
40  
41 113 institutionalized persons in the U.S..[27] This analytical study involved participants aged 18  
42  
43 114 years and older from the NHANES cohort of four consecutive cycles: 1999-2000 ( $n=3,559$ ),  
44  
45 115 2001-2002 ( $n=4,047$ ), 2003-2004 ( $n=3,771$ ), and 2005-2006 ( $n=3,071$ ). All NHANES  
46  
47 116 protocols were approved by the National Center for Health Statistics Research ethics review  
48  
49 117 board. All participants provided written informed consent.

### 50 51 118 **Body component measurements and pre-sarcopenia**

52  
53 119 Physical examinations were conducted in mobile examination centers. Weight in  
54  
55 120 kilograms, height in centimeters, and waist circumference (WC) in centimeters were measured

1  
2  
3 121 using standardized techniques and equipment. Body mass index (BMI) was calculated as  
4  
5 122 weight in kilograms divided by height in meters squared. Overweight was defined as a BMI  
6  
7 123 between 25.0-29.9 and obesity as a BMI of 30.0 or higher.[28] Central obesity was defined as  
8  
9 124 having a WC of > 102 cm for males and > 88 cm for females.[29] Total body fat percentage,  
10 125 total body fat mass, total lean body mass, appendicular skeletal muscle mass (ASM) and bone  
11 126 mineral density (BMD) were measured using the dual energy X-ray absorptiometry (DXA) in  
12 127 the four surveys from 1999 to 2006. Skeletal muscle mass index (SMI) was calculated as ASM  
13 128 divided by height squared ( $\text{kg/m}^2$ ). Pre-sarcopenia was sex-specifically defined as having a  
14 129  $\text{SMI} \leq 7.26 \text{ kg/m}^2$  in men and  $\leq 5.5 \text{ kg/m}^2$  in women.[30]

### 130 **Cardiovascular fitness**

131 Cardiovascular fitness was examined using treadmill test. Participants were assigned to  
132 one of eight protocols, according to their gender, age, BMI, and self-reported levels of physical  
133 activity. Each protocol included a 2-minute warm-up, two 3-minute exercise stages, and a 2-  
134 minute cool-down period [31]. The goal of each protocol was to elicit a heart rate that was  
135 approximately 80% of the age-predicted maximum ( $220 - \text{age}$ ) by the end of the second exercise  
136 stage. The heart rate was monitored continuously via 4 electrodes connected to the trunk and  
137 abdomen of the participant, and it was recorded at the end of warm-up, each exercise stage,  
138 and each minute of recovery.  $\text{VO}_2\text{max}$  ( $\text{mL/kg/minute}$ ) was estimated by extrapolation to an  
139 expected age-specific maximal heart rate by using measured heart rate responses to the two 3-  
140 minute exercise stages [32, 33].

### 141 **Physical activity and social-demographic factors**

142 Participants' sex, age, race, education level, annual household income, time spent  
143 watching television per day, and level of physical activity were collected by household  
144 interviews. Age was grouped into three categories: 18 to 39 years old, 40 to 59 years old, and  
145 60 years or older. Race was classified as non-Hispanic white, non-Hispanic black, Mexican

1  
2  
3 146 American, and others. Educational level was categorized into < high school graduate, high  
4  
5 147 school graduate/general equivalency diploma, or  $\geq$  college. Time spent watching TV per day  
6  
7 148 was grouped into < 2h, 2–4h, or > 4h. Annual household income was grouped into < \$25000,  
8  
9 \$25000 to \$55000, or > \$55000. Physical activity was grouped into two levels:  
10 149  
11 moderate/below, or vigorous.  
12 150

### 151 **Statistical analyses**

152 Participants' characteristics, including sex, age, race, education level, annual household  
153 income, time spent watching TV per day and level of physical activity, were shown as  
154 unweighted frequency and weighted percentage with 95% confidence interval. Weighted  
155 mean and corresponding 95% confidence intervals of body weight, BMI and obesity, WC and  
156 central obesity, total body fat percentage, total lean body mass, ASM, SMI, BMD were  
157 calculated, and mean changes with 95% confidence intervals (CI) of all these variables from  
158 1999-2000 to 2005-2006 were calculated.

159 The age- and sex-adjusted prevalence of pre-sarcopenia was calculated for four survey  
160 cycles from 1999-2000 to 2005-2006 among overall sample and the subgroups by sex, age,  
161 race, education level, annual household income, time spent watching TV per day, and  
162 physical activity level. The interactions between different groups were compared using chi-  
163 square tests. The temporal trends of pre-sarcopenia prevalence and body compositions among  
164 overall sample and within the subgroups were assessed by survey-weighted linear (for  
165 continuous outcomes) or logistic (for binary outcomes) regression models with survey year as  
166 a continuous (ordered categorical) independent variable.

167 Sampling weights were used to account for unequal probabilities of selection and  
168 nonresponses for all analyses, thereby providing estimates representative of the civilian, non-  
169 institutionalized U.S. population. All statistical analyses were performed using SAS for

1  
2  
3 170 windows version 9.4 (SAS Institute, Cary, NC, USA). A two-sided  $P < 0.05$  was considered  
4  
5 171 as statistically significant.  
6  
7

## 8 172 **Patient and public involvement**

9  
10 173 There was no patient or public involvement in this study.  
11  
12 174

## 14 175 **RESULTS**

16  
17 176 A total of 14,448 participants were included in this study, with 3,559 from 1999-2000,  
18  
19 177 4,047 from 2001-2002, 3,771 from 2003-2004, and 3,071 from 2005-2006 (**Table 1**).  
20  
21 178 Distribution of participants' characteristics in the four survey cycles were comparable. In 1999-  
22  
23 179 2000, 49.6% were women, 19.5% were 60 years or older, and 71.7% were Non-Hispanic white.  
24  
25 180 The proportion of those with a vigorous physical activity level showed a significantly decreased  
26  
27 181 trend from 1999 to 2006 ( $p < 0.001$ ).  
28  
29  
30  
31 182  
32  
33 183  
34  
35 184  
36  
37 185  
38  
39 186  
40  
41  
42  
43  
44  
45  
46  
47  
48  
49  
50  
51  
52  
53  
54  
55  
56  
57  
58  
59  
60

187

**Table 1. Participants' characteristics (weighted) from the NHANES surveys, 1999-2006**

| Characteristics                                    | No. weighted (%)         |                          |                          |                          |
|----------------------------------------------------|--------------------------|--------------------------|--------------------------|--------------------------|
|                                                    | 1999-2000 (n = 3559)     | 2001-2002 (n = 4047)     | 2003-2004 (n = 3771)     | 2005-2006 (n = 3071)     |
| <b>Sex</b>                                         |                          |                          |                          |                          |
| Men                                                | 1829 (50.4) [48.4, 52.5] | 2106 (50.0) [48.6, 51.3] | 1932 (49.5) [47.5, 51.6] | 1574 (49.7) [48.0, 51.5] |
| Women                                              | 1730 (49.6) [47.5, 51.7] | 1941 (50.0) [48.7, 51.4] | 1839 (50.5) [48.4, 52.6] | 1497 (50.3) [48.5, 52.0] |
| <b>Age group, mean (SD) [95%CI]</b>                |                          |                          |                          |                          |
| 18 – 39 yrs                                        | 43.3 (0.5) [42.1, 44.4]  | 43.6 (0.5) [42.5, 44.7]  | 44.2 (0.6) [43.0, 45.4]  | 41.4 (0.4) [40.5, 42.4]  |
| 40 – 59 yrs                                        | 1493 (47.3) [44.7, 49.9] | 1704 (44.0) [39.9, 48.1] | 1592 (42.4) [38.5, 46.3] | 1540 (44.9) [41.9, 47.8] |
| 60– 79yrs                                          | 964 (33.2) [31.1, 35.4]  | 1217 (38.2) [34.8, 41.7] | 1015 (38.0) [34.7, 41.3] | 1067 (43.8) [41.6, 46.4] |
| ≥ 80 yrs                                           | 913 (17.1) [14.7, 19.4]  | 887 (15.2) [13.8, 16.7]  | 915 (16.7) [15.1, 18.3]  | 464 (11.3) [9.3, 13.3]   |
|                                                    | 189 (2.4) [1.9, 2.8]     | 239 (2.6) [2.1, 2.0]     | 249 (2.9) [2.2, 3.5]     | --                       |
| <b>Race</b>                                        |                          |                          |                          |                          |
| Non-Hispanic white                                 | 1513 (71.7) [65.5, 77.9] | 2014 (72.4) [67.5, 77.4] | 1915 (73.2) [65.9, 80.5] | 1321 (71.1) [65.1, 77.1] |
| Non-Hispanic black                                 | 642 (9.5) [6.25, 12.8]   | 785 (10.1) [6.9, 13.2]   | 796 (10.5) [6.6, 14.3]   | 128 (5.1) [3.4, 6.9]     |
| Mexican American                                   | 1082 (6.6) [3.6, 9.5]    | 960 (7.7) [5.7, 9.7]     | 799 (7.7) [3.7, 11.7]    | 746 (8.90) [6.3, 11.5]   |
| Others                                             | 322 (12.2) [5.8, 18.6]   | 288 (9.8) [5.8, 13.9]    | 261 (8.7) [6.3, 11.0]    | 876 (14.8) [10.9, 18.8]  |
| <b>Education level</b>                             |                          |                          |                          |                          |
| < High school graduate                             | 1408 (23.6) [20.4, 26.7] | 1300 (19.2) [17.0, 21.4] | 1114 (17.8) [15.0, 20.5] | 662 (15.5) [11.9, 19.2]  |
| High school graduate/GED                           | 840 (26.4) [22.4, 30.4]  | 980 (25.5) [23.3, 27.7]  | 978 (26.9) [24.7, 29.1]  | 618 (24.5) [22.1, 26.9]  |
| ≥ College                                          | 1302 (50.0) [45.8, 54.2] | 1763 (55.3) [51.9, 58.7] | 1675 (55.3) [52.0, 58.7] | 1363 (60.0) [55.2, 64.9] |
| <b>Family annual income</b>                        |                          |                          |                          |                          |
| < \$25000                                          | 1452 (36.7) [29.6, 43.8] | 1479 (29.7) [27.1, 32.3] | 1518 (30.6) [26.7, 34.3] | 920 (20.9) [17.6, 24.2]  |
| \$25000 – \$55000                                  | 902 (30.8) [26.8, 34.8]  | 1163 (30.9) [27.5, 34.3] | 1081 (32.0) [27.5, 36.5] | 934 (30.6) [27.2, 34.1]  |
| > \$55000                                          | 731 (32.5) [26.7, 38.2]  | 1133 (39.4) [35.6, 43.1] | 958 (37.4) [32.2, 42.7]  | 1097 (48.5) [43.6, 53.5] |
| <b>Watching TV time per day, mean (SD) [95%CI]</b> |                          |                          |                          |                          |
| < 2 h                                              | 2.34 (0.03) [2.28, 2.41] | 2.31 (0.04) [2.24, 2.39] | 2.16 (0.05) [2.06, 2.27] | 2.07 (0.05) [1.97, 2.17] |
| 2-4 h                                              | 621 (19.5) [17.7, 21.6]  | 606 (19.8) [17.9, 21.6]  | 634 (22.0) [19.3, 24.8]  | 545 (22.5) [20.8, 24.2]  |
| > 4 h                                              | 2072 (68.3) [66.7, 69.9] | 2215 (63.2) [61.4, 65.2] | 2040 (64.7) [61.5, 67.9] | 1674 (66.8) [65.0, 68.5] |
|                                                    | 428 (12.2) [10.7, 13.8]  | 674 (17.0) [15.6, 18.4]  | 542 (13.3) [10.7, 15.9]  | 354 (10.7) [8.49, 13.0]  |
| <b>Physical activity level</b>                     |                          |                          |                          |                          |
| Moderate or below                                  | 888 (44.0) [40.1, 47.8]  | 1236 (51.0) [47.0, 55.0] | 1451 (61.5) [58.4, 64.6] | 1066 (54.0) [51.0, 57.0] |
| Vigorous                                           | 1013 (56.0) [52.2, 59.9] | 1253 (49.0) [45.0, 53.0] | 963 (38.5) [35.5, 41.6]  | 1027 (46.0) [43.1, 49.0] |
| <b>Body mass index</b>                             |                          |                          |                          |                          |
| Normal or below (< 25 kg/m <sup>2</sup> )          | 1351 (40.1) [36.3, 43.9] | 1617 (39.6) [38.0, 41.2] | 1389 (36.6) [34.6, 38.6] | 1089 (36.6) [33.1, 40.2] |

|                                                |                          |                          |                          |                          |
|------------------------------------------------|--------------------------|--------------------------|--------------------------|--------------------------|
| <b>Overweight (25.0-29.9 kg/m<sup>2</sup>)</b> | 1289 (35.5) [32.7, 38.3] | 1494 (36.7) [34.2, 39.3] | 1348 (35.8) [32.9, 38.6] | 1054 (34.1) [32.4, 35.9] |
| <b>Obesity (≥ 30 kg/m<sup>2</sup>)</b>         | 914 (24.4) [21.3, 27.5]  | 936 (23.7) [21.3, 26.0]  | 1034 (27.6) [24.7, 30.5] | 928 (29.3) [25.8, 32.7]  |

---

For peer review only

## 189 **Prevalence and temporal trends of pre-sarcopenia from 1999 to 2006**

190 The overall age- and sex-adjusted prevalence of pre-sarcopenia ranged from 16.4% (95%  
191 CI: 18.1%, 21.4%) in 1999-2000 to 14.8% (95% CI: 14.9%, 20.2%) in 2005-2006 (*P* for trend  
192 = 0.78) (**Table 2**).

193 The age- and sex-adjusted prevalence of pre-sarcopenia in men decreased from 22.7% (95%  
194 CI: 20.3%, 25.2%) in 1999-2000 to 12.3% (95% CI: 10.6%, 14.3%) in 2005-2006 (*P* for trend  
195 = 0.36); while in women, the prevalence went from 20.0% in 1999-2000 to 17.7% in 2005-  
196 2006 (*P* for trend = 0.20). Sex differences were the largest in 2005-2006, 12.3% for men vs.  
197 17.7% for women (*P* < 0.001). There were also racial differences of pre-sarcopenia prevalence  
198 as well as temporal trend. It significantly increased from 6.2% in 1999-2000 to 20.6% in 2005-  
199 2006 among non-Hispanic blacks (*P* for trend < 0.001), but remained stable among non-  
200 Hispanic whites (*P* for trend = 0.84) and Mexican Americans (*P* for trend = 0.54) from 1999  
201 to 2006. Participants aged  $\geq 80$  years and 60 – 79 years had a significantly higher prevalence  
202 of sarcopenia in the four survey cycles from 1999-2004 compared to those aged 18–39 years  
203 old and 40–59 years old. In three survey cycles of 1999-2000, 2001-2002, and 2003-2004,  
204 participants who had vigorous physical activity levels were more likely to have relatively lower  
205 prevalence of pre-sarcopenia compared to the lowest categories (*p* values < 0.01). In addition,  
206 participants with higher family annual income had a lower prevalence of pre-sarcopenia in  
207 survey cycles of 2001-2002 and 2003-2004. In all four survey cycles, participants with BMI <  
208 25 kg/m<sup>2</sup> has a relatively higher prevalence of pre-sarcopenia as compare with overweight and  
209 obese participants.



210

**Table 2. Prevalence (95% CIs) and temporal trends of pre-sarcopenia in the NHANES surveys from 1999 to 2006**

| Characteristics                    | 1999-2000 (n=3550) | 2001-2002 (n=3987) | 2003-2004 (n=3745) | 2005-2006 (n=3062) | P-value for trend # |
|------------------------------------|--------------------|--------------------|--------------------|--------------------|---------------------|
| <b>Overall</b>                     | 16.4 (15.3, 17.6)  | 16.4 (14.0, 19.1)  | 17.9 (16.2, 19.7)  | 14.8 (13.0, 16.8)  | 0.78                |
| <b>Sex</b>                         |                    |                    |                    |                    |                     |
| <b>Men</b>                         | 22.7 (20.3, 25.2)  | 19.7 (15.9, 24.2)  | 21.2 (18.8, 23.7)  | 12.3 (10.6, 14.3)  | 0.36                |
| <b>Women</b>                       | 20.0 (17.9, 22.3)  | 21.4 (17.7, 25.5)  | 23.0 (19.8, 26.6)  | 17.7 (14.9, 20.9)  | 0.20                |
| <b>P for sex</b>                   | 0.45               | 0.23               | 0.23               | < 0.001            |                     |
| <b>Age group</b>                   |                    |                    |                    |                    |                     |
| <b>18 – 39 yrs</b>                 | 11.3 (9.1, 14.0)   | 13.5 (10.6, 17.0)  | 14.9 (12.8, 17.3)  | 14.1 (11.8, 16.8)  | 0.04                |
| <b>40 – 59 yrs</b>                 | 15.1 (12.9, 17.5)  | 12.1 (9.9, 14.7)   | 14.2 (11.6, 17.2)  | 12.9 (11.0, 15.2)  | 0.25                |
| <b>60 – 79 yrs</b>                 | 22.3 (19.0, 26.1)  | 23.7 (18.7, 29.6)  | 23.6 (20.3, 27.2)  | 17.7 (14.4, 21.5)  | 0.38                |
| <b>≥ 80 yrs</b>                    | 45.1 (38.7, 51.6)  | 40.1 (31.8, 49.0)  | 42.0 (36.2, 48.0)  | --                 | 0.64                |
| <b>P for age group</b>             | < 0.001            | < 0.001            | < 0.001            | 0.05               |                     |
| <b>Race</b>                        |                    |                    |                    |                    |                     |
| <b>Non-Hispanic white</b>          | 22.8 (21.3, 24.5)  | 20.5 (17.5, 23.9)  | 22.9 (20.3, 25.6)  | 15.9 (13.8, 18.3)  | 0.84                |
| <b>Non-Hispanic black</b>          | 6.2 (4.2, 8.9)     | 10.8 (7.2, 15.8)   | 8.6 (5.8, 12.5)    | 20.6 (13.0, 31.1)  | < 0.001             |
| <b>Mexican American</b>            | 20.5 (17.3, 24.3)  | 20.9 (16.4, 26.2)  | 20.9 (17.1, 25.3)  | 14.9 (11.7, 18.8)  | 0.54                |
| <b>Others</b>                      | 22.3 (15.1, 31.6)  | 31.0 (23.1, 40.2)  | 32.7 (26.6, 38.0)  | 6.9 (5.0, 9.6)     | 0.13                |
| <b>P for Race</b>                  | < 0.001            | < 0.001            | < 0.001            | < 0.001            |                     |
| <b>Education level,</b>            |                    |                    |                    |                    |                     |
| <b>&lt; High school graduate</b>   | 20.7 (17.5, 24.4)  | 21.1 (14.9, 28.9)  | 22.7 (19.1, 26.7)  | 16.6 (13.3, 20.5)  | 0.34                |
| <b>High school graduate or GED</b> | 21.3 (18.2, 24.7)  | 22.0 (17.6, 27.1)  | 21.2 (19.0, 23.5)  | 14.0 (11.6, 16.8)  | 0.47                |
| <b>≥ College</b>                   | 21.6 (19.2, 24.4)  | 19.4 (16.5, 22.7)  | 22.3 (18.9, 26.1)  | 14.4 (12.3, 16.8)  | 0.59                |
| <b>P for education</b>             | 0.88               | 0.22               | 0.57               | 0.50               |                     |
| <b>Family annual income</b>        |                    |                    |                    |                    |                     |
| <b>&lt; \$25000</b>                | 23.0 (20.0, 26.3)  | 24.5 (18.5, 31.7)  | 26.2 (23.5, 29.2)  | 15.3 (12.5, 18.6)  | 0.51                |
| <b>\$25000 – \$55000</b>           | 19.7 (16.7, 23.2)  | 20.9 (17.0, 25.4)  | 22.1 (18.2, 26.5)  | 14.3 (11.6, 17.4)  | 0.77                |
| <b>&gt; \$55000</b>                | 18.5 (15.1, 22.6)  | 15.4 (11.4, 20.4)  | 16.9 (13.1, 21.5)  | 14.9 (12.5, 17.7)  | 0.94                |
| <b>P for income</b>                | 0.17               | 0.005              | < 0.001            | 0.80               |                     |
| <b>Watching TV time per day</b>    |                    |                    |                    |                    |                     |
| <b>&lt; 2 h</b>                    | 23.0 (17.6, 29.5)  | 21.1 (18.4, 24.2)  | 19.7 (14.8, 25.7)  | 14.3 (11.2, 18.1)  | 0.48                |
| <b>2-4 h</b>                       | 20.4 (18.8, 22.2)  | 21.5 (17.9, 25.7)  | 23.3 (21.1, 25.6)  | 14.5 (12.0, 17.3)  | 0.76                |
| <b>&gt; 4 h</b>                    | 24.8 (19.2, 31.4)  | 20.5 (16.3, 25.6)  | 23.5 (18.9, 28.9)  | 13.6 (10.8, 16.9)  | 0.17                |
| <b>P for watching TV time</b>      | 0.42               | 0.68               | 0.08               | 0.95               |                     |
| <b>Physical activity level</b>     |                    |                    |                    |                    |                     |
| <b>Moderate or below</b>           | 20.3 (17.5, 23.5)  | 23.4 (19.2, 28.1)  | 22.2 (18.7, 26.1)  | 14.7 (11.7, 18.3)  | 0.35                |

1  
2  
3  
4  
5  
6  
7  
8  
9  
10  
11  
12  
13  
14  
15  
16  
17  
18  
19  
20  
21  
22  
23  
24  
25  
26  
27  
28  
29  
30  
31  
32  
33  
34  
35  
36  
37  
38  
39  
40  
41  
42  
43  
44  
45  
46

|                                                   |                   |                   |                   |                   |      |
|---------------------------------------------------|-------------------|-------------------|-------------------|-------------------|------|
| <b>Vigorous</b>                                   | 15.2 (12.1, 18.8) | 15.3 (11.9, 19.3) | 16.4 (13.1, 20.4) | 12.7 (9.8, 16.3)  | 0.15 |
| <b>P for physical activity level</b>              | 0.001             | < 0.001           | 0.002             | 0.38              |      |
| <b>Body mass index</b>                            |                   |                   |                   |                   |      |
| <b>Normal or below (&lt; 25 kg/m<sup>2</sup>)</b> | 50.7 (45.3, 56.1) | 49.7 (42.1, 57.3) | 56.4 (50.4, 62.3) | 41.4 (36.0, 46.9) | 0.42 |
| <b>Overweight (25.0-29.9 kg/m<sup>2</sup>)</b>    | 5.4 (3.8, 7.8)    | 5.9 (4.1, 8.5)    | 7.2 (5.9, 8.8)    | 4.8 (3.4, 6.7)    | 0.08 |
| <b>Obesity (≥ 30 kg/m<sup>2</sup>)</b>            | 0.4 (0.2, 1.0)    | 0.3 (0.1, 1.2)    | 0.2 (0.1, 0.9)    | --                | 0.30 |
| <b>P for body mass index</b>                      | <0.001            | <0.001            | <0.001            | <0.001            |      |

211 Pre-sarcopenia was defined according to dual energy X-ray absorptiometry (DXA) criteria; GED, general equivalency diploma.  
 212 #: P-trend (1999-2006): adjusted for sex, age, race, education level, family annual income, watch TV time per day, and physical activity level in  
 213 logistic regression models.

For peer review only

## 214 **Body Compositions**

215 The average bodyweight across all participants significantly increased from 76.8 kg (95%  
216 CI: 75.6, 77.9) in 1999-2000 to 78.9 kg (95% CI: 77.4, 80.4) in 2005-2006 ( $P$  for trend =0.010),  
217 with an average increase of 2.11 kg (95%CI: 0.28, 3.93 kg) (**Table 3**). Correspondingly, the  
218 prevalence of obesity significantly increased from 24.3% (95%CI: 21.2%, 27.4) to 29.3%  
219 (95%CI: 25.8%, 32.7%) in the overall population ( $P$  for trend = 0.023), and from 20.8% (95%  
220 CI: 17.9%, 23.7%) to 27.6% (95% CI: 23.0%, 32.1%) in men ( $P$  for trend=0.007), but remained  
221 stable in women over time (from 28.0% to 30.9%,  $P$  for trend=0.229) (**Table 3 and Figure**  
222 **1A**). After stratification by age (**Figure 1B**), obesity prevalence significantly increased from  
223 25.6% to 33.8% in the 40-59 age group ( $P$  for trend=0.027), but remained stable in the other  
224 three age groups. Similar increased trends of obesity prevalence were observed in non-Hispanic  
225 whites (from 23.8% to 28.6%,  $P$  for trend =0.025) and others ethnical group (from 21.5% to  
226 36.9%,  $P$  for trend =0.007), but were statistically stable in non-Hispanic blacks and Mexican  
227 Americans (**Figure 1C**). And from 1999 to 2006, SMI was significantly decreased in non-  
228 Hispanic black group, while it was significantly increased in Mexican American and others  
229 ethnical groups (**Table 3 and Figure 2A**). Meanwhile, we observed a slight increase in waist  
230 circumference (Table 3 and Figure 2B), total lean body mass (Table 3), prevalence of central  
231 obesity (Table 3), and BMD (**Table 3 and Figure 2C**).

236

**Table 3. Trends of body weight, obesity and body compositions from 1999 to 2006 in the NHANES surveys**

| Characteristics                | Survey cycles     |                   |                   |                   | P-trend # | Mean change from 1999-2000 to 2005-2006 (95% CI) |
|--------------------------------|-------------------|-------------------|-------------------|-------------------|-----------|--------------------------------------------------|
|                                | 1999-2000         | 2001-2002         | 2003-2004         | 2005-2006         |           |                                                  |
| Weight, kg                     | 76.8 (75.6, 77.9) | 76.9 (76.1, 77.7) | 78.3 (77.5, 79.0) | 78.9 (77.4, 80.4) | 0.010     | 2.11 (0.28, 3.93)                                |
| BMI, kg/m <sup>2</sup>         | 26.9 (26.5, 27.3) | 26.8 (26.6, 27.1) | 27.3 (27.0, 27.5) | 27.5 (27.0, 28.0) | 0.016     | 0.59 (-0.01, 1.20)                               |
| Overweight, % †                | 35.5 (32.6, 38.2) | 36.7 (34.2, 39.3) | 35.8 (32.9, 38.6) | 34.1 (32.4, 35.9) | 0.25      | -1.31 (-4.45, 1.83)                              |
| Obesity, % †                   | 24.3 (21.2, 27.4) | 23.7 (21.3, 26.0) | 27.6 (24.7, 30.5) | 29.3 (25.8, 32.7) | 0.023     | 4.92 (0.49, 9.36)                                |
| Waist Circumference, cm        | 92.6 (91.3, 93.9) | 93.0 (92.4, 93.7) | 94.9 (94.3, 95.5) | 94.5 (93.1, 95.9) | <0.001    | 1.90 (0.12, 3.67)                                |
| Central obesity, % †           | 39.9 (35.3, 44.5) | 41.5 (39.3, 43.8) | 47.3 (44.5, 50.2) | 45.1 (41.2, 49.1) | 0.005     | 5.21 (-0.60, 11.0)                               |
| Total body fat percentage, %   | 33.0 (32.4, 33.7) | 32.6 (32.3, 32.9) | 33.5 (33.1, 34.0) | 32.8 (32.3, 33.3) | 0.766     | -0.24 (-1.04, 0.56)                              |
| Total lean body mass, kg       | 49.3 (48.7, 49.8) | 49.6 (49.1, 50.0) | 49.8 (49.3, 50.3) | 50.7 (50.0, 51.5) | <0.001    | 1.45 (0.57, 2.34)                                |
| ASM, kg *                      | 21.7 (21.5, 22.0) | 21.7 (21.4, 22.0) | 21.7 (21.4, 21.9) | 21.9 (21.6, 22.2) | 0.986     | 0.16 (-0.24, 0.56)                               |
| SMI, kg/m <sup>2</sup>         | 7.53 (7.45, 7.61) | 7.50 (7.41, 7.59) | 7.46 (7.38, 7.54) | 7.55 (7.46, 7.64) | 0.958     | 0.02 (-0.09, 0.14)                               |
| BMD, g/cm <sup>2</sup>         | 1.12 (1.11, 1.12) | 1.14 (1.13, 1.14) | 1.15 (1.14, 1.16) | 1.17 (1.16, 1.19) | < 0.001   | 0.06 (0.04, 0.07)                                |
| Heart rate, beats/min          | 187 (186, 187)    | 186 (185, 187)    | 186 (185, 187)    | --                | 0.15      | -0.45 (-1.57, 0.66) <sup>a</sup>                 |
| VO <sub>2</sub> max, ml/kg/min | 40.4 (39.1, 41.8) | 41.0 (40.3, 41.8) | 39.4 (38.6, 40.2) | --                | 0.14      | -1.02 (-2.52, 0.48) <sup>a</sup>                 |
| Low cardiovascular fitness, %  | 16.7 (12.6, 20.7) | 12.9 (11.0, 14.8) | 19.7 (16.3, 23.0) | --                | 0.51      | 3.03 (-1.99, 8.04) <sup>a</sup>                  |

ASM: Appendicular skeletal muscle mass, SMI: Skeletal muscle index, BMD: Bone mineral density;  
 #: P-trend (1999-2006): adjusted for sex, age, race, education level, family annual income, watch TV time per day, and physical activity level.  
<sup>a</sup>: For heart rate, VO<sub>2</sub>max and low cardiovascular fitness, the changes were from 1999-2000 to 2003-2004.  
 All statistics were weighted and shown as mean (95% confidence interval) or † percentage (95% confidence interval).  
 --: Not available.

237  
238  
239  
240  
241  
242  
243

1  
2  
3 244 **DISCUSSION**  
4

5 245 Using nearly 20 years of nationally representative U.S. data from NHANES, we found  
6  
7  
8 246 the overall prevalence of pre-sarcopenia remained stable between 1999 and 2006. However,  
9  
10 247 stratification analyses revealed that pre-sarcopenia increased considerably among non-  
11  
12 248 Hispanic blacks from 1999 to 2006. Obesity and central obesity significantly increased from  
13  
14 249 1999 to 2006. As anticipated, pre-sarcopenia and its metrics increased accordingly in young  
15  
16  
17 250 people.

18  
19 251 Sarcopenia and obesity have common environmental risk factors, including over-  
20  
21 252 nutrition, metabolic disorders, and a sedentary lifestyle.[34] Obesity can lead directly to loss  
22  
23 253 of muscle mass and strength,[35] and is commonly accompanied with a reduction in physical  
24  
25 254 activity and the promotion of metabolic disorders, which in turn, accelerates abnormal  
26  
27 255 distribution of fat mass and initiates the process of sarcopenia.[36] Our study reveals an  
28  
29 256 increasing trend in obesity prevalence across all three age groups. A significant elevation in  
30  
31 257 the prevalence of pre-sarcopenia from 1999 to 2006 was observed in the young (18-39 years)  
32  
33 258 age group. The peak period of skeletal muscle mass is around 20 years old which begins to  
34  
35 259 decrease at around 30 years old.[37] The peak period of muscle strength lags nearly 10-years  
36  
37 260 behind the peak period of muscle mass and starts to decline at around 50 years old.[38] The  
38  
39 261 speed of declination of muscle strength is 2 to 5 times faster than that of muscle mass over  
40  
41 262 the same period of time.[39] However, it is still unclear whether muscle mass reduction at a  
42  
43 263 young age would further accelerate muscle strength loss and ageing related health issues.  
44  
45 264 Observational studies reported a linearly positive association between muscle mass and  
46  
47 265 strength in both middle aged and elderly people.[40-42] This indicates the higher the amount  
48  
49 266 of muscle mass acquired during a young age may protect adults from the early onset of  
50  
51 267 sarcopenia. Therefore, it may be beneficial for prevention and intervention strategies to pay  
52  
53 268 more attention to increasing muscle mass in both young and old populations.  
54  
55  
56  
57  
58  
59  
60

1  
2  
3 269 We did not observe significant sex differences over time in relation to pre-sarcopenia  
4  
5 270 prevalence. From 1999 to 2006, pre-sarcopenia prevalence remained stable in both men and  
6  
7 271 women. Previous evidence is controversial and inconsistent. Michele *et al.* compared 195  
8  
9 272 women aged 64 to 93 years old and 142 men aged 64 to 92 years old, they found a higher  
10  
11 273 prevalence of sarcopenia in men than in women;[43] while in the Fifth Korea National Health  
12  
13 274 and Nutrition Examination Survey, sarcopenia was more prevalent in women.[44] Women  
14  
15 275 have less absolute and relative muscle mass than men[45] in biology. Besides natural  
16  
17 276 differences in skeletal muscle between men and women, such as the amount of muscle mass,  
18  
19 277 muscle capillary density, and muscle fiber type,[46] physical activity might be a potential  
20  
21 278 cause for sex differences in sarcopenia prevalence.[47] In our study, most women had lower  
22  
23 279 self-reported levels of physical activity than men. The amount of physical activity in men  
24  
25 280 gradually increased, whereas it decreased in women over time. Another critical factor is age-  
26  
27 281 related changes in the gonadal function and sex hormones regulating muscle mass  
28  
29 282 distribution. Evidence suggested lower serum testosterone levels in elderly men contributes to  
30  
31 283 muscle weakness.[48] Men experience a gradual decrease in knee extensor and handgrip  
32  
33 284 strength between 20 and 80 years of age, whereas, women experience a steep decline after the  
34  
35 285 age of 55 (menopausal age).[49 50] Although it is not clear whether age-related changes in  
36  
37 286 the gonadal function directly regulate physical activity in humans, animals after gonadectomy  
38  
39 287 can cause a dramatical decline in spontaneous physical activity.[51] Thus, sex differences  
40  
41 288 might be pivotal in understanding the process of sarcopenia and aging, understanding why  
42  
43 289 each sex remains “muscle healthy” throughout their lifespan could open new avenues to  
44  
45 290 prevent and treat sarcopenia and the ageing process.

53  
54 291 We also detected a considerably increased trend of pre-sarcopenia prevalence in non-  
55  
56 292 Hispanic black people, while the prevalence was stable in non-Hispanic Whites, Mexican  
57  
58 293 Americans and other racial groups over time. Racial differences in muscle mass have been  
59  
60

1  
2  
3 294 reported in previous studies. Evidence has shown African-Americans have significantly  
4  
5 295 higher skeletal muscle/adipose tissue-free body mass ratio than other races, although the  
6  
7 296 difference was very small.[52] Mahbubur and Abbey reported black women had greater  
8  
9 297 levels of total and regional lean mass than White and Hispanic women, while Hispanic  
10  
11 298 women had even lower values than white women after assessment of body composition of  
12  
13 299 708 healthy black, white, and Hispanic women aged 16–33 years using DXA analysis.[53]  
14  
15 300 According to the NHANES III bioelectrical impedance data, the amount of fat-free mass in  
16  
17 301 Mexican-Americans was lower than in non-Hispanic Blacks, which was lower than in non-  
18  
19 302 Hispanic Whites.[54] The underlying mechanism of racial differences is still unclear and  
20  
21 303 warrants further investigation.  
22  
23  
24  
25

26 304 This is a representative population-based study. This study firstly focused on the pre-  
27  
28 305 sarcopenia among adults. Also, there are several limitations of this study. First, we only  
29  
30 306 accessed muscle mass data rather than muscle strength which does not reflect muscle power  
31  
32 307 and may be confounded by a third variable that was not involved in this study. Second, the  
33  
34 308 prevalence of pre-sarcopenia in women may be underestimated because we used a height  
35  
36 309 adjusted definition of pre-sarcopenia[55] which is potentially problematic in identifying  
37  
38 310 participants with sarcopenic obesity.[56] However, if we had used the weight-adjusted  
39  
40 311 definition, people classified as having sarcopenia would have had higher BMI values  
41  
42 312 compared with those without sarcopenia.[57] Third, as physical activity data was self-  
43  
44 313 reported, reporting bias may exist. Recent research on self-reported levels of physical activity  
45  
46 314 indicated individuals in the U.S. tended to have differing perceptions of activity levels,  
47  
48 315 overestimating their time spent exercising compared to Europeans.[58] Future studies should  
49  
50 316 apply objective measures to muscle strength and physical activity to accurately evaluate  
51  
52 317 sarcopenia prevalence.  
53  
54  
55  
56  
57  
58  
59  
60

1  
2  
3 319 **CONCLUSIONS**  
4

5 320 Using data from the representative NHANES surveys covering nearly 20 years of data  
6  
7  
8 321 from 1999 to 2006, there was a youth tendency on prevalence of pre-sarcopenia from 1999 to  
9  
10 322 2006 among U.S. adults. Pre-sarcopenia prevalence remains stable in both men and women  
11  
12 323 over time. Together with an increase in obesity and central obesity, elevations of pre-  
13  
14 324 sarcopenia in non-Hispanic blacks and young people were observed. It is recommended to  
15  
16 325 control body fat ratio and develop good habit of keeping resistant and moderate physical  
17  
18 326 activity to prevent sarcopenia both for young and elderly people. The continued high  
19  
20 327 prevalence of pre-sarcopenia and obesity is an important public health concern.  
21  
22  
23  
24 328  
25  
26 329  
27  
28 330  
29  
30 331  
31  
32 332  
33  
34 333  
35  
36 334  
37  
38 335  
39  
40 336  
41  
42 337  
43  
44 338  
45  
46 339  
47  
48 340  
49  
50 341  
51  
52 342  
53  
54 343  
55  
56  
57  
58  
59  
60



1  
2  
3 344 **Acknowledgements**  
4

5 345 We would like to thank Mr. Christopher Lavender for the discussion on the manuscript. We  
6  
7  
8 346 also appreciate the help of Yang Deng for data collection assistance.  
9

10  
11 347 **Contributors**  
12

13 348 JL, XZ and HL designed and conducted the research; JL, XZ and HL analyzed data; JL, XZ,  
14  
15 349 HL, YW and DG are responsible for the final content of the manuscript; all authors took part  
16  
17  
18 350 in writing the manuscript, read and approved the final version.  
19

20  
21 351 **Funding**  
22

23  
24 352 This work was supported by NSFC (Natural Science Foundation of China, No.: 81703238)  
25  
26 353 (Dr. Zhang and Dan-Tong Gu).  
27

28  
29 354 **Competing interests**  
30

31  
32 355 None declared.  
33

34 356 **Patient consent for publication**  
35

36 357 Not required.  
37

38  
39 358 **Provenance and peer review**  
40

41 359 Not commissioned; externally peer reviewed.  
42

43 360 **Ethics approval**  
44

45  
46 361 All NHANES protocols were approved by the National Center for Health Statistics Research  
47  
48 362 ethics review board.  
49

50  
51 363 **Data availability statement**  
52

53  
54 364 The data link is <https://www.cdc.gov/nchs/nhanes/index.htm>.  
55

56 365  
57  
58  
59  
60

## 366 REFERENCES

- 367 1. Cruz-Jentoft AJ, Baeyens JP, Bauer JM, et al. Sarcopenia: European consensus on  
368 definition and diagnosis: Report of the European Working Group on Sarcopenia in  
369 Older People. *Age and Ageing* 2010;39:412-423.
- 370 2. Hashemi R, Shafiee G, Motlagh AD, et al. Sarcopenia and its associated factors in Iranian  
371 older individuals: Results of SARIR study. *Arch Gerontol Geriatr* 2016;66:18-22.
- 372 3. Santilli V, Bernetti A, Mangone M, Paoloni M. Clinical definition of sarcopenia. *Clin*  
373 *Cases Miner Bone Metab* 2014;11(3):177-80
- 374 4. Provan M, Mander T. Mobility, exercise, nutrition and healthy ageing to avoid sarcopenia.  
375 *Post Reprod Health* 2018;24(2):98-102.
- 376 5. Lynch GS, Koopman R. Dietary meat and protection against sarcopenia. *Meat Sci* 2018.
- 377 6. Lee SG, Lee YH, Kim KJ, Lee W, Kwon OH, Kim JH. Additive association of vitamin D  
378 insufficiency and sarcopenia with low femoral bone mineral density in  
379 noninstitutionalized elderly population: the Korea National Health and Nutrition  
380 Examination Surveys 2009-2010. *Osteoporos Int* 2013;24(11):2789-99.
- 381 7. Wakabayashi H, Sakuma K. Comprehensive approach to sarcopenia treatment. *Curr Clin*  
382 *Pharmacol* 2014;9(2):171-80
- 383 8. Fry CS, Lee JD, Mula J, et al. Inducible depletion of satellite cells in adult, sedentary mice  
384 impairs muscle regenerative capacity without affecting sarcopenia. *Nat Med*.  
385 2015;21(1):76-80.
- 386 9. Campos F, Abrigo J, Aguirre F, et al. Sarcopenia in a mice model of chronic liver disease:  
387 role of the ubiquitin-proteasome system and oxidative stress. *Pflugers Arch* 2018.
- 388 10. Roubenoff R. Sarcopenic obesity: does muscle loss cause fat gain? Lessons from  
389 rheumatoid arthritis and osteoarthritis. *Ann N Y Acad Sci* 2000;904:553-7
- 390 11. Chen YC, Tu YK, Huang KC, Chen PC, Chu DC, Lee YL. Pathway from central obesity  
391 to childhood asthma. Physical fitness and sedentary time are leading factors. *Am J*  
392 *Respir Crit Care Med* 2014;189(10):1194-203.
- 393 12. Calvani R, Marini F, Cesari M, et al. Biomarkers for physical frailty and sarcopenia: state  
394 of the science and future developments. *J Cachexia Sarcopenia Muscle*  
395 2015;6(4):278-86.
- 396 13. Kim SE. Clinical Implication of Sarcopenia in Patients with Inflammatory Bowel  
397 Disease. *Korean J Gastroenterol* 2018;71(6):308-14.
- 398 14. Ryan E, McNicholas D, Creavin B, Kelly ME, Walsh T, Beddy D. Sarcopenia and  
399 Inflammatory Bowel Disease: A Systematic Review. *Inflamm Bowel Dis*  
400 2019;1;25(1):67-73.
- 401 15. Han E, Lee YH, Kim BK, et al. Sarcopenia is associated with the risk of significant liver  
402 fibrosis in metabolically unhealthy subjects with chronic hepatitis B. *Aliment*  
403 *Pharmacol Ther* 2018;48(3):300-312.
- 404 16. Hanai T, Shiraki M, Nishimura K, et al. Sarcopenia impairs prognosis of patients with  
405 liver cirrhosis. *Nutrition* 2015;31(1):193-99.
- 406 17. Moctezuma-Velazquez C, Low G, Mourtzakis M, et al. Association between Low  
407 Testosterone Levels and Sarcopenia in Cirrhosis: A Cross-sectional Study. *Ann*  
408 *Hepatol* 2018;17(4):615-23.
- 409 18. Bhanji RA, Moctezuma-Velazquez C, Duarte-Rojo A, et al. Myosteatorsis and sarcopenia  
410 are associated with hepatic encephalopathy in patients with cirrhosis. *Hepatol Int*  
411 2018;12(4):377-386.
- 412 19. Siegert E, March C, Otten L, et al. Prevalence of sarcopenia in systemic sclerosis:  
413 Assessing body composition and functional disability in patients with systemic  
414 sclerosis. *Nutrition* 2018;55-56:51-55.

- 415 20. Miyamoto Y, Baba Y, Sakamoto Y, et al. Sarcopenia is a Negative Prognostic Factor  
416 After Curative Resection of Colorectal Cancer. *Ann Surg Oncol* 2015;22(8):2663-68.
- 417 21. Voron T, Tselikas L, Pietrasz D, et al. Sarcopenia Impacts on Short- and Long-term  
418 Results of Hepatectomy for Hepatocellular Carcinoma. *Ann Surg* 2015;261(6):1173-  
419 83.
- 420 22. Joglekar S, Asghar A, Mott SL, et al. Sarcopenia Is an Independent Predictor of  
421 Complications Following Pancreatectomy for Adenocarcinoma. *J Surg Oncol*  
422 2015;111(6):771-75.
- 423 23. Jones SE, Maddocks M, Kon SSC, et al. Sarcopenia in COPD: prevalence, clinical  
424 correlates and response to pulmonary rehabilitation. *Thorax* 2015;70(3):213-18.
- 425 24. Chin SO, Rhee SY, Chon S, et al. Sarcopenia is independently associated with  
426 cardiovascular disease in older Korean adults: the Korea National Health and  
427 Nutrition Examination Survey (KNHANES) from 2009. *PloS one* 2013;8(3):e60119.
- 428 25. Atkins JL, Whincup PH, Morris RW, Lennon LT, Papacosta O, Wannamethee SG.  
429 Sarcopenic obesity and risk of cardiovascular disease and mortality: a population-  
430 based cohort study of older men. *J Am Geriatr Soc* 2014;62(2):253-60.
- 431 26. Kim YK, Lee HS, Ryu JJ, In Lee H, Seo SG. Sarcopenia increases the risk for mortality  
432 in patients who undergo amputation for diabetic foot. *J Foot Ankle Res* 2018;11:32.
- 433 27. Plan and operation of the Third National Health and Nutrition Examination Survey, 1988-  
434 94. Series 1: programs and collection procedures. Vital and health statistics. *Vital*  
435 *Health Stat* 1994(32):1-407
- 436 28. Flegal KM, Carroll MD, Kit BK, Ogden CL. Prevalence of obesity and trends in the  
437 distribution of body mass index among US adults, 1999-2010. *JAMA*  
438 2012;307(5):491-7.
- 439 29. Obesity: Preventing and managing the global epidemic: Report of a WHO consultation on  
440 obesity. *World Health Organ Tech Rep Ser* 2000;894:i-xii, 1-253.
- 441 30. Cruz-Jentoft AJ, Baeyens JP, Bauer JM, et al. Sarcopenia: European consensus on  
442 definition and diagnosis: Report of the European Working Group on Sarcopenia in  
443 Older People. *Age Ageing* 2010;39(4):412-23.
- 444 31. National Center for Health Statistics CFDACAP. NHANES Cardiovascular Fitness  
445 Procedures Manual. Hyattsville, MD: Centers for Disease Control and Prevention, US  
446 Department of Health and Human Services; 2004.
- 447 32. Wilmore JH, Haskell WL. Use of the heart rate-energy expenditure relationship in the  
448 individualized prescription of exercise. *Am J Clin Nutr* 1971;24(9):1186-92.
- 449 33. Medicine ACoS. ACSM's Guidelines for Exercise Testing and Prescription. Philadelphia,  
450 PA: Lippincott Williams & Wilkins 2009(8<sup>th</sup> ed)
- 451 34. Choi B, Schnall PL, Yang H, et al. Sedentary work, low physical job demand, and obesity  
452 in US workers. *Am J Ind Med* 2010;53(11):1088-101.
- 453 35. Wannamethee SG, Atkins JL. Muscle loss and obesity: the health implications of  
454 sarcopenia and sarcopenic obesity. *Proc Nutr Soc* 2015;74(4):405-12.
- 455 36. Cleasby ME, Jamieson PM, Atherton PJ. Insulin resistance and sarcopenia: mechanistic  
456 links between common co-morbidities. *J Endocrinol* 2016;229(2):R67-81.
- 457 37. McLean R, Samelson LJ, Lorbergs A, et al. Greater peri-aortic adipose tissue is  
458 associated with increased trunk muscle fat in men and women, 2017.
- 459 38. Silva AM, Shen W, Heo M, et al. Ethnicity-Related Skeletal Muscle Differences Across  
460 the Lifespan. *Am J Hum Biol* 2010;22(1):76-82.
- 461 39. Delmonico MJ, Harris TB, Visser M, et al. Longitudinal study of muscle strength,  
462 quality, and adipose tissue infiltration. *Am J Clin Nutr* 2009;90(6):1579-85.

- 1  
2  
3 463 40. Newman AB, Haggerty CL, Goodpaster B, et al. Strength and muscle quality in a well-  
4 464 functioning cohort of older adults: the Health, Aging and Body Composition Study. *J*  
5 465 *Am Geriatr Soc* 2003;51(3):323-30  
6 466 41. Rolland Y, Czerwinski S, Abellan Van Kan G, et al. Sarcopenia: its assessment, etiology,  
7 467 pathogenesis, consequences and future perspectives. *J Nutr Health Aging*  
8 468 2008;12(7):433-50  
9 469 42. Goodpaster BH, Park SW, Harris TB, et al. The loss of skeletal muscle strength, mass,  
10 470 and quality in older adults: the health, aging and body composition study. *J Gerontol*  
11 471 *A Biol Sci Med Sci* 2006;61(10):1059-64  
12 472 43. Iannuzzi-Sucich M, Prestwood KM, Kenny AM. Prevalence of sarcopenia and predictors  
13 473 of skeletal muscle mass in healthy, older men and women. *J Gerontol A Biol Sci Med*  
14 474 *Sci* 2002;57(12):M772-M777.  
15 475 44. Hong N, Lee EY, Kim CO. Gamma-glutamyl transferase is associated with sarcopenia  
16 476 and sarcopenic obesity in community-dwelling older adults: results from the Fifth  
17 477 Korea National Health and Nutrition Examination Survey, 2010-2011. *Endocr J*  
18 478 2015;62(7):585-92.  
19 479 45. Marcellino C, Henn RL, Olinto MT, Bressan AW, Paniz VM, Pattussi MP. Physical  
20 480 inactivity and associated factors among women from a municipality in southern  
21 481 Brazil. *J Phys Act Health* 2014;11(4):777-83.  
22 482 46. Kim J. Gender difference in association between appendicular skeletal muscle mass and  
23 483 cardiometabolic abnormalities in normal-weight and obese adults: Korea National  
24 484 Health and Nutrition Examination Survey (KNHANES) IV-3 and V-1. *Asia Pac J*  
25 485 *Public Health* 2015;27(2):Np468-75.  
26 486 47. Genton L, Karsegard VL, Chevalley T, Kossovsky MP, Darmon P, Pichard C. Body  
27 487 composition changes over 9 years in healthy elderly subjects and impact of physical  
28 488 activity. *Clin Nutr* 2011;30(4):436-42.  
29 489 48. Doherty TJ. Invited review: Aging and sarcopenia. *J Appl Physiol* (1985)  
30 490 2003;95(4):1717-27.  
31 491 49. Samson MM, Meeuwse IB, Crowe A, Dessens JA, Duursma SA, Verhaar HJ.  
32 492 Relationships between physical performance measures, age, height and body weight  
33 493 in healthy adults. *Age Ageing* 2000;29(3):235-42  
34 494 50. Phillips SK, Rook KM, Siddle NC, Bruce SA, Woledge RC. Muscle weakness in women  
35 495 occurs at an earlier age than in men, but strength is preserved by hormone  
36 496 replacement therapy. *Clin Sci* 1993;84(1):95-8  
37 497 51. Rosenfeld CS. Sex-dependent differences in voluntary physical activity. *J Neurosci Res*  
38 498 2017;95(1-2):279-90.  
39 499 52. Wang Z, Heo M, Lee RC, Kotler DP, Withers RT, Heymsfield SB. Muscularity in adult  
40 500 humans: proportion of adipose tissue-free body mass as skeletal muscle. *Am J Hum*  
41 501 *Biol* 2001;13(5):612-9.  
42 502 53. Rahman M, Berenson AB. Racial difference in lean mass distribution among  
43 503 reproductive-aged women. *Ethn Dis* 2010;20(4):346-52  
44 504 54. Chumlea WC, Guo SS, Kuczmarski RJ, et al. Body composition estimates from  
45 505 NHANES III bioelectrical impedance data. *Int J Obes Relat Metab Disord*  
46 506 2002;26(12):1596-609.  
47 507 55. Meng NH, Li CI, Liu CS, et al. Comparison of height- and weight-adjusted sarcopenia in  
48 508 a Taiwanese metropolitan older population. *Geriatr Gerontol Int* 2015;15(1):45-53.  
49 509 56. Kim YS, Lee Y, Chung YS, et al. Prevalence of sarcopenia and sarcopenic obesity in the  
50 510 Korean population based on the Fourth Korean National Health and Nutritional  
51 511 Examination Surveys. *J Gerontol A Biol Sci Med Sci* 2012;67(10):1107-13.

- 1  
2  
3 512 57. Janssen I, Heymsfield SB, Ross R. Low relative skeletal muscle mass (sarcopenia) in  
4 513 older persons is associated with functional impairment and physical disability. *J Am*  
5 514 *Geriatr Soc* 2002;50(5):889-96  
6  
7 515 58. Kapteyn A, Banks J, Hamer M, et al. What they say and what they do: comparing  
8 516 physical activity across the USA, England and the Netherlands. *J Epidemiol*  
9 517 *Community Health* 2018;72(6):471-76.  
10 518  
11  
12 519

13  
14  
15  
16  
17  
18  
19  
20  
21  
22  
23  
24  
25  
26  
27  
28  
29  
30  
31  
32  
33  
34  
35  
36  
37  
38  
39  
40  
41  
42  
43  
44  
45  
46  
47  
48  
49  
50  
51  
52  
53  
54  
55  
56  
57  
58  
59  
60

For peer review only

1  
2  
3 520 **Figure Legends**  
4

5  
6 521 **Figure 1.** Prevalence of obesity stratified by sex (A), age (B) and racial groups (C) from 1999  
7 522 to 2006 in the NHANES surveys. 95% CI: 95% confidence interval. P values refer to  
8 523 temporal trend by logistic regression models.  
9  
10

11 524 **Figure 2.** Distribution of body compositions, including SMI (A), WC (B), BMD (C), and  
12 525 TPF (D) by sex, age and racial groups from 1999 to 2006. SMI: Skeletal muscle index; WC:  
13 526 Waist circumference; BMD: Bone mineral density; TPF: Total percentage of body fat; 95%  
14 527 CI: 95% confidence interval. P values refer to temporal trend by logistic regression models.  
15  
16  
17  
18  
19  
20  
21  
22  
23  
24  
25  
26  
27  
28  
29  
30  
31  
32  
33  
34  
35  
36  
37  
38  
39  
40  
41  
42  
43  
44  
45  
46  
47  
48  
49  
50  
51  
52  
53  
54  
55  
56  
57  
58  
59  
60

For peer review only

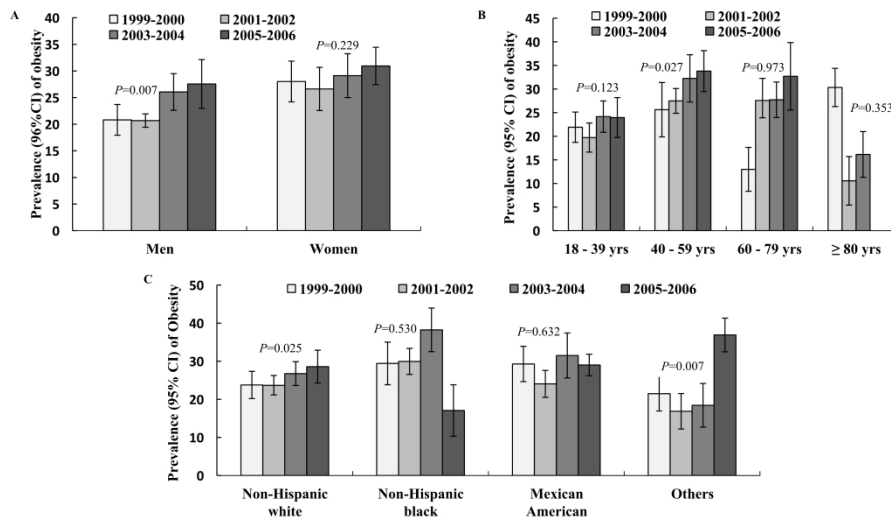

Figure 1. prevalence of obesity by gender, age and racial groups from 1999 to 2006

Figure 1. Prevalence of obesity stratified by sex (A), age (B) and racial groups (C) from 1999 to 2006 in the NHANES surveys. 95% CI: 95% confidence interval. P values refer to temporal trend by logistic regression models.

338x190mm (300 x 300 DPI)

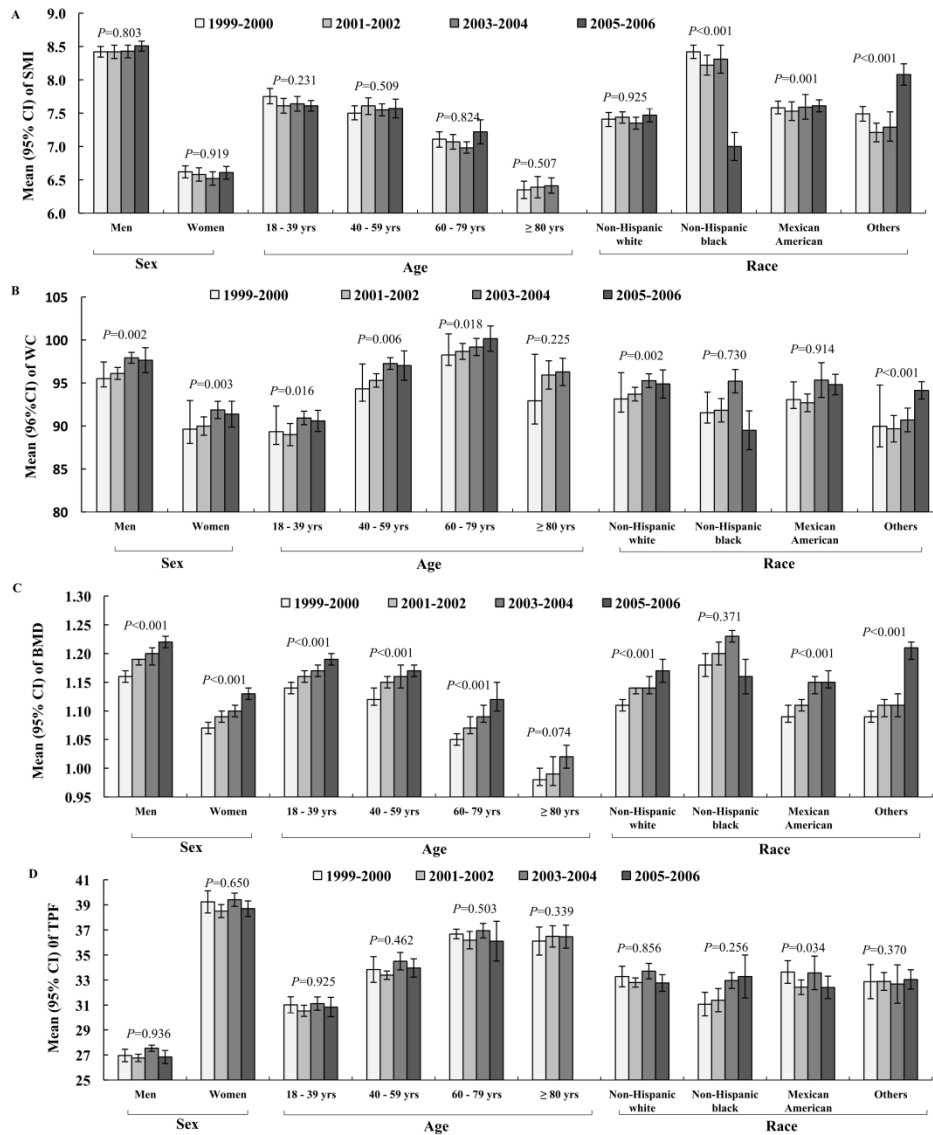

Figure 2. Distribution of body compositions, including SMI (A), WC (B), BMD (C), and TPF (D) by sex, age and racial groups from 1999 to 2006. SMI: Skeletal muscle index; WC: Waist circumference; BMD: Bone mineral density; TPF: Total percentage of body fat; 95% CI: 95% confidence interval. P values refer to temporal trend by logistic regression models.

326x378mm (300 x 300 DPI)



STROBE Statement—Checklist of items that should be included in reports of *cross-sectional studies*

|                           | Item No      | Recommendation                                                                                                                                                                                                                                                                                                                                                                                                |
|---------------------------|--------------|---------------------------------------------------------------------------------------------------------------------------------------------------------------------------------------------------------------------------------------------------------------------------------------------------------------------------------------------------------------------------------------------------------------|
| <b>Title and abstract</b> | Page: 1, 3   | (a) Indicate the study's design with a commonly used term in the title or the abstract<br>(b) Provide in the abstract an informative and balanced summary of what was done and what was found                                                                                                                                                                                                                 |
| <b>Introduction</b>       |              |                                                                                                                                                                                                                                                                                                                                                                                                               |
| Background/rationale      | Page: 5-6    | Explain the scientific background and rationale for the investigation being reported                                                                                                                                                                                                                                                                                                                          |
| Objectives                | Page: 6      | State specific objectives, including any prespecified hypotheses                                                                                                                                                                                                                                                                                                                                              |
| <b>Methods</b>            |              |                                                                                                                                                                                                                                                                                                                                                                                                               |
| Study design              | Page: 6      | Present key elements of study design early in the paper                                                                                                                                                                                                                                                                                                                                                       |
| Setting                   | Page: 6      | Describe the setting, locations, and relevant dates, including periods of recruitment, exposure, follow-up, and data collection                                                                                                                                                                                                                                                                               |
| Participants              | Page: 6      | (a) Give the eligibility criteria, and the sources and methods of selection of participants                                                                                                                                                                                                                                                                                                                   |
| Variables                 | Page: 6-8    | Clearly define all outcomes, exposures, predictors, potential confounders, and effect modifiers. Give diagnostic criteria, if applicable                                                                                                                                                                                                                                                                      |
| Data sources/measurement  | Page: 6-8    | For each variable of interest, give sources of data and details of methods of assessment (measurement). Describe comparability of assessment methods if there is more than one group                                                                                                                                                                                                                          |
| Bias                      | Page: 7-8    | Describe any efforts to address potential sources of bias                                                                                                                                                                                                                                                                                                                                                     |
| Study size                | Page: 6      | Explain how the study size was arrived at                                                                                                                                                                                                                                                                                                                                                                     |
| Quantitative variables    | Page: 7-8    | Explain how quantitative variables were handled in the analyses. If applicable, describe which groupings were chosen and why                                                                                                                                                                                                                                                                                  |
| Statistical methods       | Page: 8-9    | (a) Describe all statistical methods, including those used to control for confounding<br>(b) Describe any methods used to examine subgroups and interactions<br>(c) Explain how missing data were addressed<br>(d) If applicable, describe analytical methods taking account of sampling strategy<br>(e) Describe any sensitivity analyses                                                                    |
| <b>Results</b>            |              |                                                                                                                                                                                                                                                                                                                                                                                                               |
| Participants              | Page: 9      | (a) Report numbers of individuals at each stage of study—eg numbers potentially eligible, examined for eligibility, confirmed eligible, included in the study, completing follow-up, and analysed<br>(b) Give reasons for non-participation at each stage<br>(c) Consider use of a flow diagram                                                                                                               |
| Descriptive data          | Page: 9      | (a) Give characteristics of study participants (eg demographic, clinical, social) and information on exposures and potential confounders<br>(b) Indicate number of participants with missing data for each variable of interest                                                                                                                                                                               |
| Outcome data              | Page: 12, 15 | Report numbers of outcome events or summary measures                                                                                                                                                                                                                                                                                                                                                          |
| Main results              | Page: 12, 15 | (a) Give unadjusted estimates and, if applicable, confounder-adjusted estimates and their precision (eg, 95% confidence interval). Make clear which confounders were adjusted for and why they were included<br>(b) Report category boundaries when continuous variables were categorized<br>(c) If relevant, consider translating estimates of relative risk into absolute risk for a meaningful time period |
| Other analyses            | Page: 12     | Report other analyses done—eg analyses of subgroups and interactions, and sensitivity                                                                                                                                                                                                                                                                                                                         |

1  
2  
3  
4  
5  
6  
7  
8  
9  
10  
11  
12  
13  
14  
15  
16  
17  
18  
19  
20  
21  
22  
23  
24  
25  
26  
27  
28  
29  
30  
31  
32  
33  
34  
35  
36  
37  
38  
39  
40  
41  
42  
43  
44  
45  
46  
47  
48  
49  
50  
51  
52  
53  
54  
55  
56  
57  
58  
59  
60

---

analyses

---



---

**Discussion**

---

|                  |             |                                                                                                                                                                            |
|------------------|-------------|----------------------------------------------------------------------------------------------------------------------------------------------------------------------------|
| Key results      | Page: 17    | Summarise key results with reference to study objectives                                                                                                                   |
| Limitations      | Page: 19    | Discuss limitations of the study, taking into account sources of potential bias or imprecision. Discuss both direction and magnitude of any potential bias                 |
| Interpretation   | Page: 17-19 | Give a cautious overall interpretation of results considering objectives, limitations, multiplicity of analyses, results from similar studies, and other relevant evidence |
| Generalisability | Page: 18    | Discuss the generalisability (external validity) of the study results                                                                                                      |

---

**Other information**

---

|         |          |                                                                                                                                                               |
|---------|----------|---------------------------------------------------------------------------------------------------------------------------------------------------------------|
| Funding | Page: 21 | Give the source of funding and the role of the funders for the present study and, if applicable, for the original study on which the present article is based |
|---------|----------|---------------------------------------------------------------------------------------------------------------------------------------------------------------|

---

\*Give information separately for exposed and unexposed groups.

**Note:** An Explanation and Elaboration article discusses each checklist item and gives methodological background and published examples of transparent reporting. The STROBE checklist is best used in conjunction with this article (freely available on the Web sites of PLoS Medicine at <http://www.plosmedicine.org/>, Annals of Internal Medicine at <http://www.annals.org/>, and Epidemiology at <http://www.epidem.com/>). Information on the STROBE Initiative is available at [www.strobe-statement.org](http://www.strobe-statement.org).

# BMJ Open

## Prevalence and Temporal Trends of Pre-sarcopenia Metrics and Related Body Composition Measurements from the 1999-2006 NHANES survey

|                                 |                                                                                                                                                                                                                                                                                                                                                                                                                                                                                                                 |
|---------------------------------|-----------------------------------------------------------------------------------------------------------------------------------------------------------------------------------------------------------------------------------------------------------------------------------------------------------------------------------------------------------------------------------------------------------------------------------------------------------------------------------------------------------------|
| Journal:                        | <i>BMJ Open</i>                                                                                                                                                                                                                                                                                                                                                                                                                                                                                                 |
| Manuscript ID                   | bmjopen-2019-034495.R2                                                                                                                                                                                                                                                                                                                                                                                                                                                                                          |
| Article Type:                   | Original research                                                                                                                                                                                                                                                                                                                                                                                                                                                                                               |
| Date Submitted by the Author:   | 21-Apr-2020                                                                                                                                                                                                                                                                                                                                                                                                                                                                                                     |
| Complete List of Authors:       | Li, Ji-Bin; Sun Yat-sen University Cancer Center, Department of Clinical Research<br>Wu, Yuwan; Xinhua Hospital Affiliated to Shanghai Jiaotong University School of Medicine<br>Gu, Dantong; Fudan University School of Public Health, Department of Bio-statistics<br>Li, Huajun; Xinhua Hospital Affiliated to Shanghai Jiaotong University School of Medicine, Department of Pediatrics<br>Zhang, Xi; Xinhua Hospital Affiliated to Shanghai Jiaotong University School of Medicine, Clinical Research Unit |
| <b>Primary Subject Heading</b>: | Epidemiology                                                                                                                                                                                                                                                                                                                                                                                                                                                                                                    |
| Secondary Subject Heading:      | Epidemiology                                                                                                                                                                                                                                                                                                                                                                                                                                                                                                    |
| Keywords:                       | Body Composition, PUBLIC HEALTH, EPIDEMIOLOGY                                                                                                                                                                                                                                                                                                                                                                                                                                                                   |
|                                 |                                                                                                                                                                                                                                                                                                                                                                                                                                                                                                                 |

SCHOLARONE™  
Manuscripts



I, the Submitting Author has the right to grant and does grant on behalf of all authors of the Work (as defined in the below author licence), an exclusive licence and/or a non-exclusive licence for contributions from authors who are: i) UK Crown employees; ii) where BMJ has agreed a CC-BY licence shall apply, and/or iii) in accordance with the terms applicable for US Federal Government officers or employees acting as part of their official duties; on a worldwide, perpetual, irrevocable, royalty-free basis to BMJ Publishing Group Ltd ("BMJ") its licensees and where the relevant Journal is co-owned by BMJ to the co-owners of the Journal, to publish the Work in this journal and any other BMJ products and to exploit all rights, as set out in our [licence](#).

The Submitting Author accepts and understands that any supply made under these terms is made by BMJ to the Submitting Author unless you are acting as an employee on behalf of your employer or a postgraduate student of an affiliated institution which is paying any applicable article publishing charge ("APC") for Open Access articles. Where the Submitting Author wishes to make the Work available on an Open Access basis (and intends to pay the relevant APC), the terms of reuse of such Open Access shall be governed by a Creative Commons licence – details of these licences and which [Creative Commons](#) licence will apply to this Work are set out in our licence referred to above.

Other than as permitted in any relevant BMJ Author's Self Archiving Policies, I confirm this Work has not been accepted for publication elsewhere, is not being considered for publication elsewhere and does not duplicate material already published. I confirm all authors consent to publication of this Work and authorise the granting of this licence.

1  
2  
3 **1 Prevalence and Temporal Trends of Pre-sarcopenia Metrics and Related Body**  
4  
5 **2 Composition Measurements from the 1999-2006 NHANES survey**  
6  
7

8  
9 **3** Ji-Bin Li <sup>1</sup>, Yu-Wan Wu <sup>2</sup>, Dan-Tong Gu <sup>3</sup>, Hua-Jun Li <sup>2\*</sup>, Xi Zhang <sup>4\*</sup>  
10

11 **4 Affiliations:**  
12

- 13  
14 1. Department of Clinical Research, Sun Yat-sen University Cancer Center; State Key  
15 6 Laboratory of Oncology in Southern China; Collaborative Innovation Center for  
16 7 Cancer Medicine, Guangzhou 510060, China.  
18  
19 8 2. Department of Pediatrics, Xin Hua Hospital, Shanghai Jiao Tong University  
20 9 School of Medicine, Shanghai, China  
21  
22 3. Department of Bio-statistics, School of Public Health, Fudan University, Shanghai,  
23 10 China.  
24 11  
25 4. Clinical Research Unit, Xin Hua Hospital, Shanghai Jiao Tong University School of  
26 12 Medicine, Shanghai, China.  
27 13  
28  
29  
30  
31  
32  
33  
34  
35

36 **15 Short title:** Trends of Pre-sarcopenia Metrics among U.S. Adults  
37

38 **16** \* Corresponding author  
39

40 **17 Correspondence to**  
41

42 **18** Xi Zhang, PhD  
43

44  
45 19 Clinical Research Unit, Xin Hua Hospital, Shanghai Jiao Tong University School of  
46 20 Medicine, 1665 Kongjiang Road, Kejiao Building 233B, Shanghai, China 200092.  
47

48 **21** Tel: +86-021-2507-7482;  
49

50  
51 **22** Fax: +86-021-2507-7480;  
52

53 **23** E-mail: zhangxi@xinhumed.com.cn  
54  
55

56 **24**  
57  
58 **25** Hua-Jun Li, PhD  
59  
60

1  
2  
3  
4  
5  
6  
7  
8  
9  
10  
11  
12  
13  
14  
15  
16  
17  
18  
19  
20  
21  
22  
23  
24  
25  
26  
27  
28  
29  
30  
31  
32  
33  
34  
35  
36  
37  
38  
39  
40  
41  
42  
43  
44  
45  
46  
47  
48  
49  
50  
51  
52  
53  
54  
55  
56  
57  
58  
59  
60

26 Department of Pediatrics, Xin Hua Hospital, Shanghai Jiao Tong University School of  
27 Medicine, No. 1665 Kongjiang Road, Shanghai, China 200092.

28 Tel: +86-021-2507-6794;

29 E-mail: lihuajun@xinquamed.com.cn

30

31 **Word count:** 2827

For peer review only

## 32 **Abstract**

33 **Objective:** To evaluate the prevalence and temporal trends of pre-sarcopenia and related  
34 body composition measurements.

35 **Study design and Setting:** This is an analysis study of the data from the 1999-2006 National  
36 Health and Nutrition Examination Survey (NHANES).

37 **Methods:** Pre-sarcopenia was defined according to the guidelines from the European  
38 Working Group on Sarcopenia. Logistic or linear regression models were used to evaluate the  
39 linear trend of the prevalence of pre-sarcopenia, obesity, and related body composition  
40 measurements.

41 **Participants:** A total of 29,947 participants aged 18 - 90 years from five waves of the  
42 NHANES were included in the analysis.

43 **Outcome measures:** Pre-sarcopenia was sex-specifically defined as having a skeletal mass  
44 index  $\leq 7.26$  kg/m<sup>2</sup> in men and  $\leq 5.5$  kg/m<sup>2</sup> in women. Body composition measurements,  
45 including total body fat percentage, total body fat mass, total lean body mass, appendicular  
46 skeletal muscle mass (ASM) and bone mineral density (BMD), were obtained by dual energy  
47 X-ray absorptiometry.

48 **Results:** The overall prevalence of pre-sarcopenia ranged from 16.4% in 1999-2000 to 14.8%  
49 in 2005-2006 (*P* for trend=0.78). Pre-sarcopenia was stable in both males (*P* for trend=0.36)  
50 and females (*P* for trend=0.20). The pre-sarcopenia prevalence was significantly elevated  
51 among the 18- to 39-year-old age group (from 11.3% to 14.1%, *P* for trend = 0.04) and  
52 among non-Hispanic blacks (from 6.2% to 20.6%, *P* for trend < 0.001). Adults aged  $\geq 80$   
53 years old had the highest prevalence.

54 **Conclusions:** The prevalence of pre-sarcopenia increased among young individuals over  
55 time. Non-Hispanic blacks also demonstrated an increasing trend in the prevalence over time.

56 **Keywords:** Pre-sarcopenia Metrics; Body Composition; Temporal Trends.

1  
2  
3 57  
4  
5 58  
6  
7  
8 59  
9  
10 60  
11  
12 61  
13  
14 62  
15  
16 63  
17  
18 64  
19  
20 65  
21  
22 66  
23  
24 67  
25  
26 68  
27  
28 69  
29  
30 70  
31  
32 71  
33  
34  
35  
36  
37  
38  
39  
40  
41  
42  
43  
44  
45  
46  
47  
48  
49  
50  
51  
52  
53  
54  
55  
56  
57  
58  
59  
60

### **Strengths and limitations of this study**

- We used the data from the nationally representative population-based surveys of the NHANES (1999-2006).
- Body composition measurements were obtained by the gold standard dual energy X-ray absorptiometry.
- Appendicular skeletal muscle mass rather than muscle strength and physical performance was assessed.
- The prevalence of pre-sarcopenia in women may be underestimated when using a height-adjusted definition of pre-sarcopenia.
- Reporting bias may exist due to self-reported physical activity data.



## 72 INTRODUCTION

73 According to the 2010 European Working Group on Sarcopenia in Older People  
74 (EWGSOP), sarcopenia is defined as a cluster of geriatric conditions characterized by  
75 progressive and generalized loss of skeletal muscle mass and strength with a high risk of  
76 adverse outcomes, including poor quality of life, physical disability, and even death. [1] The  
77 prevalence of pre-sarcopenia (5.9%) and sarcopenia (4.4%) among adults aged 45 years and  
78 older is high in the Netherlands [2]. It has been conservatively estimated that sarcopenia affects  
79 more than 50 million people around the world and will increase by more than 200 million over  
80 the next 40 years. [3]

81 Currently, there are a variety of definitions for sarcopenia, none of which have been  
82 agreed upon, and the prevalence of the disease is highly dependent on the diagnostic criteria  
83 used. Among the three components of sarcopenia defined in the EWGSOP, muscle mass,  
84 muscle strength, and performance, muscle mass plays a critical role in the progression of  
85 sarcopenia, and low muscle mass has been identified as pre-sarcopenia. Sarcopenia, especially  
86 in the context low skeletal muscle mass, is mainly caused by ageing, decreased participation in  
87 physical activities, [4] malnutrition, [5 6] and endocrine and metabolic disorders. [7] These  
88 factors directly contribute to the loss of muscle mass, [8] influencing muscle strength and  
89 performance and leading to a lower metabolic rate and reduced physical activity, which often  
90 causes fat gain. The gained fat could lead to a further loss of muscle mass and strength via  
91 cytokine protein catabolism [9] and insulin resistance. [10] Thus, sarcopenia and its effects can  
92 be part of a spiralling process of declining health.

93 Sarcopenic obesity, defined as a loss in body lean mass but preservation or even an  
94 increase in body fat mass, can have serious health implications. Recent data has indicated that  
95 obesity affects more people of younger age due to physical inactivity. [11] Therefore, it is  
96 reasonable to hypothesize that the prevalence of pre-sarcopenia has increased accordingly.

1  
2  
3 97 Currently, there is a lack of evidence to support this statement. Numerous studies have reported  
4  
5 98 that sarcopenia/low muscle mass is related to frailty, [12] inflammation, [13 14] liver fibrosis,  
6  
7  
8 99 [15 16] cirrhosis, [17 18] systemic sclerosis, [19] cancer, [20-22] chronic obstructive  
9  
10 100 pulmonary disease, [23] cardiovascular disease (CVD), [24 25] and mortality, [26] all of which  
11  
12 101 place considerable health and economic burdens on public health care services. Thus, it is  
13  
14 102 important to depict the prevalence and temporal trends of pre-sarcopenia and related body  
15  
16 103 composition measurements over time in relation to sex, age, and race to better inform public  
17  
18 104 health policy and prevention strategies.

19  
20  
21 105 In this study, we estimated the population-based prevalence and temporal trends of pre-  
22  
23 106 sarcopenia metrics and related body composition measurements among adults in the United  
24  
25 107 States (U.S.) from 1999 to 2006 by using data from the National Health and Nutrition  
26  
27 108 Examination Survey (NHANES).

## 109 110 **METHODS**

### 111 **Study design and participants**

112 The NHANES is a nationally representative cross-sectional survey among non-  
113 institutionalized civilians in the U.S. [27] This analytical study involved participants aged 18  
114 years and older from the NHANES cohort surveyed across four consecutive cycles: 1999-2000  
115 ( $n=3,559$ ), 2001-2002 ( $n=4,047$ ), 2003-2004 ( $n=3,771$ ), and 2005-2006 ( $n=3,071$ ). All  
116 NHANES protocols were approved by the National Centre for Health Statistics Research ethics  
117 review board. All participants provided written informed consent.

### 118 **Body component measurements and pre-sarcopenia**

119 Physical examinations were conducted in mobile examination centres. Weight in  
120 kilograms, height in centimetres, and waist circumference (WC) in centimetres were measured  
121 using standardized techniques and equipment. Body mass index (BMI) was calculated as

1  
2  
3 122 weight in kilograms divided by the square of the height in metres. Overweight was defined as  
4  
5 123 a BMI between 25.0-29.9 and obesity as a BMI of 30.0 or higher. [28] Central obesity was  
6  
7 124 defined as having a WC of > 102 cm for males and > 88 cm for females. [29] Total body fat  
8  
9 125 percentage, total body fat mass, total lean body mass, appendicular skeletal muscle mass (ASM)  
10  
11 126 and bone mineral density (BMD) were measured using dual energy X-ray absorptiometry  
12  
13 127 (DXA) in the four surveys from 1999 to 2006. The total appendicular skeletal muscle mass  
14  
15 128 index (TASM) was calculated as the ASM divided by the height squared ( $\text{kg}/\text{m}^2$ ). Pre-  
16  
17 129 sarcopenia was sex-specifically defined as having a TASM  $\leq 7.26 \text{ kg}/\text{m}^2$  in men and  $\leq 5.5$   
18  
19 130  $\text{kg}/\text{m}^2$  in women. [30]

### 131 **Physical activity and social-demographic factors**

132 Participants' sex, age, race, education level, annual household income, time spent  
133 watching television per day, and level of physical activity were collected by household  
134 interviews. Age was grouped into three categories: 18 to 39 years old, 40 to 59 years old, and  
135 60 years or older. Race was classified as non-Hispanic white, non-Hispanic black, Mexican  
136 American, and others. Educational level was categorized into < high school graduate, high  
137 school graduate/general equivalency diploma, or  $\geq$  college. Time spent watching TV per day  
138 was grouped into < 2 h, 2-4 h, or > 4 h. Annual household income was grouped into <  
139 \$25000, \$25000 to \$55000, or > \$55000. Physical activity was grouped into two levels:  
140 moderate/below or vigorous.

### 141 **Statistical analyses**

142 Participants' characteristics, including sex, age, race, education level, annual household  
143 income, time spent watching TV per day and level of physical activity, are shown as  
144 unweighted frequencies and weighted percentages with 95% confidence intervals. Weighted  
145 means and corresponding 95% confidence intervals of body weight, BMI and obesity, WC

1  
2  
3 146 and central obesity, total body fat percentage, total lean body mass, ASM, TASM, and BMD  
4  
5 147 were calculated, and mean changes with 95% confidence intervals (CIs) of all these variables  
6  
7  
8 148 from 1999-2000 to 2005-2006 were calculated.

9  
10 149 The age- and sex-adjusted prevalence of pre-sarcopenia was calculated for the four  
11  
12 150 survey cycles from 1999-2000 to 2005-2006 for the overall sample and the sex, age, race,  
13  
14 151 education level, annual household income, time spent watching TV per day, and physical  
15  
16 152 activity level subgroups. The temporal trends of pre-sarcopenia prevalence, obesity and  
17  
18 153 different body composition measurements, including TASM, WC, BMD, and TPF, for the  
19  
20 154 overall sample and within the subgroups were assessed by survey-weighted linear (for  
21  
22 155 continuous outcomes) or logistic (for binary outcomes) regression models with survey year as  
23  
24 156 a continuous (ordered categorical) independent variable after adjustment for sex, age, race,  
25  
26 157 education level, annual household income, time spent watching TV per day, and physical  
27  
28 158 activity level [31 32].

29  
30  
31  
32  
33 159 Sampling weights were used to account for unequal probabilities of selection and  
34  
35 160 nonresponses for all analyses, thereby providing estimates representative of the non-  
36  
37 161 institutionalized civilian U.S. population. All statistical analyses were performed using SAS  
38  
39 162 for Windows version 9.4 (SAS Institute, Cary, NC, USA). A two-sided  $P < 0.05$  was  
40  
41 163 considered statistically significant.

#### 42 164 **Patient and public involvement**

43  
44  
45 165 There was no patient or public involvement in this study.

#### 46 47 48 49 50 51 167 **RESULTS**

52  
53 168 A total of 14,448 participants were included in this study, with 3,559 from 1999-2000,  
54  
55 169 4,047 from 2001-2002, 3,771 from 2003-2004, and 3,071 from 2005-2006 (**Table 1**). The  
56  
57 170 distributions of the participants' characteristics across the four survey cycles were comparable.

1  
2  
3 171 In 1999-2000, 49.6% of the participants were women, 19.5% were 60 years or older, and 71.7%  
4  
5 172 were non-Hispanic white. The proportion of patients with a vigorous physical activity level  
6  
7  
8 173 showed a significantly decreasing trend from 1999 to 2006 ( $P < 0.001$ ).  
9  
10  
11  
12  
13  
14  
15  
16  
17  
18  
19  
20  
21  
22  
23  
24  
25  
26  
27  
28  
29  
30  
31  
32  
33  
34  
35  
36  
37  
38  
39  
40  
41  
42  
43  
44  
45  
46  
47  
48  
49  
50  
51  
52  
53  
54  
55  
56  
57  
58  
59  
60

For peer review only

174

**Table 1. Participants' characteristics (weighted) from the NHANES surveys, 1999-2006**

| Characteristics                                           | No. weighted (%)         |                          |                          |                          |
|-----------------------------------------------------------|--------------------------|--------------------------|--------------------------|--------------------------|
|                                                           | 1999-2000 (n = 3559)     | 2001-2002 (n = 4047)     | 2003-2004 (n = 3771)     | 2005-2006 (n = 3071)     |
| <b>Sex</b>                                                |                          |                          |                          |                          |
| Men                                                       | 1829 (50.4) [48.4, 52.5] | 2106 (50.0) [48.6, 51.3] | 1932 (49.5) [47.5, 51.6] | 1574 (49.7) [48.0, 51.5] |
| Women                                                     | 1730 (49.6) [47.5, 51.7] | 1941 (50.0) [48.7, 51.4] | 1839 (50.5) [48.4, 52.6] | 1497 (50.3) [48.5, 52.0] |
| <b>Age group, mean (SD) [95% CI]</b>                      |                          |                          |                          |                          |
| 18 – 39 yrs                                               | 1493 (47.3) [44.7, 49.9] | 1704 (44.0) [39.9, 48.1] | 1592 (42.4) [38.5, 46.3] | 1540 (44.9) [41.9, 47.8] |
| 40 – 59 yrs                                               | 964 (33.2) [31.1, 35.4]  | 1217 (38.2) [34.8, 41.7] | 1015 (38.0) [34.7, 41.3] | 1067 (43.8) [41.6, 46.4] |
| 60– 79 yrs                                                | 913 (17.1) [14.7, 19.4]  | 887 (15.2) [13.8, 16.7]  | 915 (16.7) [15.1, 18.3]  | 464 (11.3) [9.3, 13.3]   |
| ≥ 80 yrs                                                  | 189 (2.4) [1.9, 2.8]     | 239 (2.6) [2.1, 2.0]     | 249 (2.9) [2.2, 3.5]     | --                       |
| <b>Race</b>                                               |                          |                          |                          |                          |
| Non-Hispanic white                                        | 1513 (71.7) [65.5, 77.9] | 2014 (72.4) [67.5, 77.4] | 1915 (73.2) [65.9, 80.5] | 1321 (71.1) [65.1, 77.1] |
| Non-Hispanic black                                        | 642 (9.5) [6.25, 12.8]   | 785 (10.1) [6.9, 13.2]   | 796 (10.5) [6.6, 14.3]   | 128 (5.1) [3.4, 6.9]     |
| Mexican American                                          | 1082 (6.6) [3.6, 9.5]    | 960 (7.7) [5.7, 9.7]     | 799 (7.7) [3.7, 11.7]    | 746 (8.90) [6.3, 11.5]   |
| Others                                                    | 322 (12.2) [5.8, 18.6]   | 288 (9.8) [5.8, 13.9]    | 261 (8.7) [6.3, 11.0]    | 876 (14.8) [10.9, 18.8]  |
| <b>Education level</b>                                    |                          |                          |                          |                          |
| < High school graduate                                    | 1408 (23.6) [20.4, 26.7] | 1300 (19.2) [17.0, 21.4] | 1114 (17.8) [15.0, 20.5] | 662 (15.5) [11.9, 19.2]  |
| High school graduate/GED                                  | 840 (26.4) [22.4, 30.4]  | 980 (25.5) [23.3, 27.7]  | 978 (26.9) [24.7, 29.1]  | 618 (24.5) [22.1, 26.9]  |
| ≥ College                                                 | 1302 (50.0) [45.8, 54.2] | 1763 (55.3) [51.9, 58.7] | 1675 (55.3) [52.0, 58.7] | 1363 (60.0) [55.2, 64.9] |
| <b>Annual household income</b>                            |                          |                          |                          |                          |
| < \$25000                                                 | 1452 (36.7) [29.6, 43.8] | 1479 (29.7) [27.1, 32.3] | 1518 (30.6) [26.7, 34.3] | 920 (20.9) [17.6, 24.2]  |
| \$25000 – \$55000                                         | 902 (30.8) [26.8, 34.8]  | 1163 (30.9) [27.5, 34.3] | 1081 (32.0) [27.5, 36.5] | 934 (30.6) [27.2, 34.1]  |
| > \$55000                                                 | 731 (32.5) [26.7, 38.2]  | 1133 (39.4) [35.6, 43.1] | 958 (37.4) [32.2, 42.7]  | 1097 (48.5) [43.6, 53.5] |
| <b>Time spent watching TV per day, mean (SD) [95% CI]</b> |                          |                          |                          |                          |
| < 2 h                                                     | 621 (19.5) [17.7, 21.6]  | 606 (19.8) [17.9, 21.6]  | 634 (22.0) [19.3, 24.8]  | 545 (22.5) [20.8, 24.2]  |
| 2-4 h                                                     | 2072 (68.3) [66.7, 69.9] | 2215 (63.2) [61.4, 65.2] | 2040 (64.7) [61.5, 67.9] | 1674 (66.8) [65.0, 68.5] |
| > 4 h                                                     | 428 (12.2) [10.7, 13.8]  | 674 (17.0) [15.6, 18.4]  | 542 (13.3) [10.7, 15.9]  | 354 (10.7) [8.49, 13.0]  |
| <b>Physical activity level</b>                            |                          |                          |                          |                          |
| Moderate or below                                         | 888 (44.0) [40.1, 47.8]  | 1236 (51.0) [47.0, 55.0] | 1451 (61.5) [58.4, 64.6] | 1066 (54.0) [51.0, 57.0] |
| Vigorous                                                  | 1013 (56.0) [52.2, 59.9] | 1253 (49.0) [45.0, 53.0] | 963 (38.5) [35.5, 41.6]  | 1027 (46.0) [43.1, 49.0] |
| <b>Body mass index</b>                                    |                          |                          |                          |                          |
| Normal or below (< 25 kg/m <sup>2</sup> )                 | 1351 (40.1) [36.3, 43.9] | 1617 (39.6) [38.0, 41.2] | 1389 (36.6) [34.6, 38.6] | 1089 (36.6) [33.1, 40.2] |

|    |  |  |  |  |  |
|----|--|--|--|--|--|
| 1  |  |  |  |  |  |
| 2  |  |  |  |  |  |
| 3  |  |  |  |  |  |
| 4  |  |  |  |  |  |
| 5  |  |  |  |  |  |
| 6  |  |  |  |  |  |
| 7  |  |  |  |  |  |
| 8  |  |  |  |  |  |
| 9  |  |  |  |  |  |
| 10 |  |  |  |  |  |
| 11 |  |  |  |  |  |
| 12 |  |  |  |  |  |
| 13 |  |  |  |  |  |
| 14 |  |  |  |  |  |
| 15 |  |  |  |  |  |
| 16 |  |  |  |  |  |
| 17 |  |  |  |  |  |
| 18 |  |  |  |  |  |
| 19 |  |  |  |  |  |
| 20 |  |  |  |  |  |
| 21 |  |  |  |  |  |
| 22 |  |  |  |  |  |
| 23 |  |  |  |  |  |
| 24 |  |  |  |  |  |
| 25 |  |  |  |  |  |
| 26 |  |  |  |  |  |
| 27 |  |  |  |  |  |
| 28 |  |  |  |  |  |
| 29 |  |  |  |  |  |
| 30 |  |  |  |  |  |
| 31 |  |  |  |  |  |
| 32 |  |  |  |  |  |
| 33 |  |  |  |  |  |
| 34 |  |  |  |  |  |
| 35 |  |  |  |  |  |
| 36 |  |  |  |  |  |
| 37 |  |  |  |  |  |
| 38 |  |  |  |  |  |
| 39 |  |  |  |  |  |
| 40 |  |  |  |  |  |
| 41 |  |  |  |  |  |
| 42 |  |  |  |  |  |
| 43 |  |  |  |  |  |
| 44 |  |  |  |  |  |
| 45 |  |  |  |  |  |
| 46 |  |  |  |  |  |

175 --: Not available.

For peer review only

## 176 **Prevalence and temporal trends of pre-sarcopenia from 1999 to 2006**

177 The overall age- and sex-adjusted prevalence of pre-sarcopenia ranged from 16.4% (95%  
178 CI: 15.3%, 17.6%) in 1999-2000 to 14.8% (95% CI: 13.0%, 16.8%) in 2005-2006 (*P* for  
179 trend = 0.78) (**Table 2**).

180 The age-adjusted prevalence of pre-sarcopenia in men was 22.7% (95% CI: 20.3%, 25.2%)  
181 in 1999-2000 and 12.3% (95% CI: 10.6%, 14.3%) in 2005-2006 (*P* for trend = 0.36), while in  
182 women, the prevalence was 20.0% in 1999-2000 and 17.7% in 2005-2006 (*P* for trend = 0.20).  
183 The prevalence of pre-sarcopenia in women was significantly higher than that in men in 2005-  
184 2006 (17.7% for women vs. 12.3% for men; *P* < 0.001). There were also racial differences in  
185 pre-sarcopenia prevalence as well as temporal trends. The prevalence significantly increased  
186 from 6.2% in 1999-2000 to 20.6% in 2005-2006 among non-Hispanic blacks (*P* for trend <  
187 0.001) but remained stable among non-Hispanic whites (*P* for trend = 0.84) and Mexican  
188 Americans (*P* for trend = 0.54) from 1999 to 2006. Compared to those in the other age groups,  
189 participants aged  $\geq 80$  years and 60 – 79 years had a significantly higher prevalence of pre-  
190 sarcopenia in the four survey cycles from 1999-2006. In three of the survey cycles (1999-2000,  
191 2001-2002, and 2003-2004), compared to those who reported moderate/low physical activity  
192 levels, participants who reported vigorous physical activity levels were more likely to have a  
193 lower prevalence of pre-sarcopenia (*P* values < 0.01). In addition, participants with higher  
194 annual household incomes had a lower prevalence of pre-sarcopenia in the 2001-2002 and  
195 2003-2004 survey cycles. In all four survey cycles, participants with BMI < 25 kg/m<sup>2</sup> had a  
196 relatively higher prevalence of pre-sarcopenia than overweight and obese participants.



197

Table 2. Prevalence (95% CIs) and temporal trends of pre-sarcopenia in the NHANES surveys from 1999 to 2006

| Characteristics                       | 1999-2000 (n=3550) | 2001-2002 (n=3987) | 2003-2004 (n=3745) | 2005-2006 (n=3062) | P-value for trend # |
|---------------------------------------|--------------------|--------------------|--------------------|--------------------|---------------------|
| <b>Overall</b>                        | 16.4 (15.3, 17.6)  | 16.4 (14.0, 19.1)  | 17.9 (16.2, 19.7)  | 14.8 (13.0, 16.8)  | 0.78                |
| <b>Sex</b>                            |                    |                    |                    |                    |                     |
| <b>Men</b>                            | 22.7 (20.3, 25.2)  | 19.7 (15.9, 24.2)  | 21.2 (18.8, 23.7)  | 12.3 (10.6, 14.3)  | 0.36                |
| <b>Women</b>                          | 20.0 (17.9, 22.3)  | 21.4 (17.7, 25.5)  | 23.0 (19.8, 26.6)  | 17.7 (14.9, 20.9)  | 0.20                |
| <b>P for sex</b>                      | 0.45               | 0.23               | 0.23               | < 0.001            |                     |
| <b>Age group</b>                      |                    |                    |                    |                    |                     |
| <b>18 – 39 yrs</b>                    | 11.3 (9.1, 14.0)   | 13.5 (10.6, 17.0)  | 14.9 (12.8, 17.3)  | 14.1 (11.8, 16.8)  | 0.04                |
| <b>40 – 59 yrs</b>                    | 15.1 (12.9, 17.5)  | 12.1 (9.9, 14.7)   | 14.2 (11.6, 17.2)  | 12.9 (11.0, 15.2)  | 0.25                |
| <b>60 – 79 yrs</b>                    | 22.3 (19.0, 26.1)  | 23.7 (18.7, 29.6)  | 23.6 (20.3, 27.2)  | 17.7 (14.4, 21.5)  | 0.38                |
| <b>≥ 80 yrs</b>                       | 45.1 (38.7, 51.6)  | 40.1 (31.8, 49.0)  | 42.0 (36.2, 48.0)  | --                 | 0.64                |
| <b>P for age group</b>                | < 0.001            | < 0.001            | < 0.001            | 0.05               |                     |
| <b>Race</b>                           |                    |                    |                    |                    |                     |
| <b>Non-Hispanic white</b>             | 22.8 (21.3, 24.5)  | 20.5 (17.5, 23.9)  | 22.9 (20.3, 25.6)  | 15.9 (13.8, 18.3)  | 0.84                |
| <b>Non-Hispanic black</b>             | 6.2 (4.2, 8.9)     | 10.8 (7.2, 15.8)   | 8.6 (5.8, 12.5)    | 20.6 (13.0, 31.1)  | < 0.001             |
| <b>Mexican American</b>               | 20.5 (17.3, 24.3)  | 20.9 (16.4, 26.2)  | 20.9 (17.1, 25.3)  | 14.9 (11.7, 18.8)  | 0.54                |
| <b>Others</b>                         | 22.3 (15.1, 31.6)  | 31.0 (23.1, 40.2)  | 32.7 (26.6, 38.0)  | 6.9 (5.0, 9.6)     | 0.13                |
| <b>P for Race</b>                     | < 0.001            | < 0.001            | < 0.001            | < 0.001            |                     |
| <b>Education level,</b>               |                    |                    |                    |                    |                     |
| <b>&lt; High school graduate</b>      | 20.7 (17.5, 24.4)  | 21.1 (14.9, 28.9)  | 22.7 (19.1, 26.7)  | 16.6 (13.3, 20.5)  | 0.34                |
| <b>High school graduate or GED</b>    | 21.3 (18.2, 24.7)  | 22.0 (17.6, 27.1)  | 21.2 (19.0, 23.5)  | 14.0 (11.6, 16.8)  | 0.47                |
| <b>≥ College</b>                      | 21.6 (19.2, 24.4)  | 19.4 (16.5, 22.7)  | 22.3 (18.9, 26.1)  | 14.4 (12.3, 16.8)  | 0.59                |
| <b>P for education</b>                | 0.88               | 0.22               | 0.57               | 0.50               |                     |
| <b>Annual household income</b>        |                    |                    |                    |                    |                     |
| <b>&lt; \$25000</b>                   | 23.0 (20.0, 26.3)  | 24.5 (18.5, 31.7)  | 26.2 (23.5, 29.2)  | 15.3 (12.5, 18.6)  | 0.51                |
| <b>\$25000 – \$55000</b>              | 19.7 (16.7, 23.2)  | 20.9 (17.0, 25.4)  | 22.1 (18.2, 26.5)  | 14.3 (11.6, 17.4)  | 0.77                |
| <b>&gt; \$55000</b>                   | 18.5 (15.1, 22.6)  | 15.4 (11.4, 20.4)  | 16.9 (13.1, 21.5)  | 14.9 (12.5, 17.7)  | 0.94                |
| <b>P for income</b>                   | 0.17               | 0.005              | < 0.001            | 0.80               |                     |
| <b>Time spent watching TV per day</b> |                    |                    |                    |                    |                     |
| <b>&lt; 2 h</b>                       | 23.0 (17.6, 29.5)  | 21.1 (18.4, 24.2)  | 19.7 (14.8, 25.7)  | 14.3 (11.2, 18.1)  | 0.48                |
| <b>2-4 h</b>                          | 20.4 (18.8, 22.2)  | 21.5 (17.9, 25.7)  | 23.3 (21.1, 25.6)  | 14.5 (12.0, 17.3)  | 0.76                |
| <b>&gt; 4 h</b>                       | 24.8 (19.2, 31.4)  | 20.5 (16.3, 25.6)  | 23.5 (18.9, 28.9)  | 13.6 (10.8, 16.9)  | 0.17                |
| <b>P for time spent watching TV</b>   | 0.42               | 0.68               | 0.08               | 0.95               |                     |
| <b>Physical activity level</b>        |                    |                    |                    |                    |                     |

1  
2  
3  
4  
5  
6  
7  
8  
9  
10  
11  
12  
13  
14  
15  
16  
17  
18  
19  
20  
21  
22  
23  
24  
25  
26  
27  
28  
29  
30  
31  
32  
33  
34  
35  
36  
37  
38  
39  
40  
41  
42  
43  
44  
45  
46

|                                                   |                   |                   |                   |                   |      |
|---------------------------------------------------|-------------------|-------------------|-------------------|-------------------|------|
| <b>Moderate or below</b>                          | 20.3 (17.5, 23.5) | 23.4 (19.2, 28.1) | 22.2 (18.7, 26.1) | 14.7 (11.7, 18.3) | 0.35 |
| <b>Vigorous</b>                                   | 15.2 (12.1, 18.8) | 15.3 (11.9, 19.3) | 16.4 (13.1, 20.4) | 12.7 (9.8, 16.3)  | 0.15 |
| <b>P for physical activity level</b>              | 0.001             | < 0.001           | 0.002             | 0.38              |      |
| <b>Body mass index</b>                            |                   |                   |                   |                   |      |
| <b>Normal or below (&lt; 25 kg/m<sup>2</sup>)</b> | 50.7 (45.3, 56.1) | 49.7 (42.1, 57.3) | 56.4 (50.4, 62.3) | 41.4 (36.0, 46.9) | 0.42 |
| <b>Overweight (25.0-29.9 kg/m<sup>2</sup>)</b>    | 5.4 (3.8, 7.8)    | 5.9 (4.1, 8.5)    | 7.2 (5.9, 8.8)    | 4.8 (3.4, 6.7)    | 0.08 |
| <b>Obesity (≥ 30 kg/m<sup>2</sup>)</b>            | 0.4 (0.2, 1.0)    | 0.3 (0.1, 1.2)    | 0.2 (0.1, 0.9)    | --                | 0.30 |
| <b>P for body mass index</b>                      | <0.001            | <0.001            | <0.001            | <0.001            |      |

198 --: Not available.

199 Pre-sarcopenia was defined according to dual energy X-ray absorptiometry (DXA) criteria: GED, general equivalency diploma.

200 #: P-value for trend (1999-2006) was calculated by using logistic regression models adjusted for sex, age, race, education level, annual household income,

201 time spent watching TV per day, and physical activity level.

202 P-values for the differences between groups in each survey cycle were obtained by the chi-squared test.

## 203 **Body Composition Measurements**

204 The average body weight across all participants significantly increased from 76.8 kg (95%  
205 CI: 75.6, 77.9) in 1999-2000 to 78.9 kg (95% CI: 77.4, 80.4) in 2005-2006 ( $P$  for trend =0.010),  
206 with an average increase of 2.11 kg (95% CI: 0.28, 3.93 kg) (**Table 3**). Correspondingly, the  
207 prevalence of obesity significantly increased from 24.3% (95% CI: 21.2%, 27.4%) to 29.3%  
208 (95% CI: 25.8%, 32.7%) in the overall population ( $P$  for trend = 0.023) and from 20.8% (95%  
209 CI: 17.9%, 23.7%) to 27.6% (95% CI: 23.0%, 32.1%) in men ( $P$  for trend=0.007) but remained  
210 stable in women (from 28.0% to 30.9%,  $P$  for trend=0.229) over time (**Table 3 and Figure**  
211 **1A**). After stratification by age (**Figure 1B**), the prevalence of obesity significantly increased  
212 from 25.6% to 33.8% in the 40-59 age group ( $P$  for trend=0.027) but remained stable in the  
213 other three age groups. Similar increasing trends of obesity prevalence were observed in non-  
214 Hispanic whites (from 23.8% to 28.6%,  $P$  for trend =0.025) but were statistically stable in non-  
215 Hispanic blacks and Mexican Americans (**Figure 1C**). From 1999 to 2006, the TASM  
216 significantly decreased in the non-Hispanic black group but significantly increased in the  
217 Mexican American and other ethnic groups (**Table 3 and Figure 2A**). Meanwhile, we observed  
218 a slight increase in waist circumference (Table 3 and Figure 2B), total lean body mass (Table  
219 3), prevalence of central obesity (Table 3), and BMD (**Table 3 and Figure 2C**).

224 **Table 3. Trends in body weight, obesity and other body composition measurements from 1999 to 2006 in the NHANES surveys**

| Characteristics              | Survey cycles     |                   |                   |                   | P-value for trend # | Mean change from 1999-2000 to 2005-2006 (95% CI) |
|------------------------------|-------------------|-------------------|-------------------|-------------------|---------------------|--------------------------------------------------|
|                              | 1999-2000         | 2001-2002         | 2003-2004         | 2005-2006         |                     |                                                  |
| Weight, kg                   | 76.8 (75.6, 77.9) | 76.9 (76.1, 77.7) | 78.3 (77.5, 79.0) | 78.9 (77.4, 80.4) | 0.010               | 2.11 (0.28, 3.93)                                |
| BMI, kg/m <sup>2</sup>       | 26.9 (26.5, 27.3) | 26.8 (26.6, 27.1) | 27.3 (27.0, 27.5) | 27.5 (27.0, 28.0) | 0.016               | 0.59 (-0.01, 1.20)                               |
| Overweight, % †              | 35.5 (32.6, 38.2) | 36.7 (34.2, 39.3) | 35.8 (32.9, 38.6) | 34.1 (32.4, 35.9) | 0.25                | -1.31 (-4.45, 1.83)                              |
| Obesity, % †                 | 24.3 (21.2, 27.4) | 23.7 (21.3, 26.0) | 27.6 (24.7, 30.5) | 29.3 (25.8, 32.7) | 0.023               | 4.92 (0.49, 9.36)                                |
| Waist Circumference, cm      | 92.6 (91.3, 93.9) | 93.0 (92.4, 93.7) | 94.9 (94.3, 95.5) | 94.5 (93.1, 95.9) | <0.001              | 1.90 (0.12, 3.67)                                |
| Central obesity, % †         | 39.9 (35.3, 44.5) | 41.5 (39.3, 43.8) | 47.3 (44.5, 50.2) | 45.1 (41.2, 49.1) | 0.005               | 5.21 (-0.60, 11.0)                               |
| Total body fat percentage, % | 33.0 (32.4, 33.7) | 32.6 (32.3, 32.9) | 33.5 (33.1, 34.0) | 32.8 (32.3, 33.3) | 0.766               | -0.24 (-1.04, 0.56)                              |
| Total lean body mass, kg     | 49.3 (48.7, 49.8) | 49.6 (49.1, 50.0) | 49.8 (49.3, 50.3) | 50.7 (50.0, 51.5) | <0.001              | 1.45 (0.57, 2.34)                                |
| ASM, kg *                    | 21.7 (21.5, 22.0) | 21.7 (21.4, 22.0) | 21.7 (21.4, 21.9) | 21.9 (21.6, 22.2) | 0.986               | 0.16 (-0.24, 0.56)                               |
| SMI, kg/m <sup>2</sup>       | 7.53 (7.45, 7.61) | 7.50 (7.41, 7.59) | 7.46 (7.38, 7.54) | 7.55 (7.46, 7.64) | 0.958               | 0.02 (-0.09, 0.14)                               |
| BMD, g/cm <sup>2</sup>       | 1.12 (1.11, 1.12) | 1.14 (1.13, 1.14) | 1.15 (1.14, 1.16) | 1.17 (1.16, 1.19) | < 0.001             | 0.06 (0.04, 0.07)                                |

225 ASM: Appendicular skeletal muscle mass, TASM: Total appendicular skeletal muscle index, BMD: Bone mineral density;  
 226 #: P-value for trend (1999-2006) was adjusted for sex, age, race, education level, annual household income, time spent watching TV per day, and  
 227 physical activity level.  
 228 All statistics were weighted and shown as the means (95% confidence interval) or † percentages (95% confidence intervals).

1  
2  
3 231 **DISCUSSION**  
4

5 232 In this large-scale study that analysed nationally representative data from U.S.  
6  
7 233 respondents to the NHANES, we found that the overall prevalence of pre-sarcopenia  
8  
9 234 remained stable, while there was a substantial increase in the prevalence for the non-Hispanic  
10  
11 235 black and young age groups from 1999 to 2006. Hence, our hypothesis regarding an  
12  
13 236 increasing trend in the pre-sarcopenia prevalence over time was not fully supported by the  
14  
15 237 findings. Our results indicate that certain subpopulations might be more vulnerable to pre-  
16  
17 238 sarcopenia than the overall population. Indeed, we found that individuals who were older or  
18  
19 239 under/normal weight had a considerably higher prevalence of pre-sarcopenia.  
20  
21  
22  
23

24 240 Our study found an increasing trend in the prevalence of obesity and central obesity  
25  
26 241 from 1999 to 2006 among the overall population. Previous studies reported that obesity can  
27  
28 242 lead to loss of muscle mass and strength [33] and is commonly accompanied by a reduction  
29  
30 243 in physical activity and deterioration of metabolic disorders, which in turn accelerates the  
31  
32 244 abnormal distribution of fat mass and initiates the process of sarcopenia. [34] In contrast, it is  
33  
34 245 interesting that the prevalence of pre-sarcopenia was considerably higher in under/normal  
35  
36 246 weight adults than in obese adults in our study. The contradictory findings might be  
37  
38 247 explained by the fact that our study only measured skeletal muscle mass, but the muscle mass  
39  
40 248 of under/normal weight individuals might be relatively lower than that of overweight/obese  
41  
42 249 individuals. In addition, our study focused on pre-sarcopenia rather than sarcopenia, which is  
43  
44 250 defined as the presence of both low muscle mass and low muscle function (strength or  
45  
46 251 physical performance).  
47  
48  
49  
50

51 252 A previous study reported that skeletal muscle mass begins to decrease at approximately  
52  
53 253 30 – 39 years old. [35] Accordingly, we found a relatively higher prevalence of pre-  
54  
55 254 sarcopenia in the older age groups than in the 18-39 age group. However, it is still unclear  
56  
57 255 whether muscle mass reduction would further accelerate muscle strength loss and ageing-  
58  
59  
60

1  
2  
3 256 related health issues. Observational studies have reported a linearly positive association  
4  
5 257 between muscle mass and strength in both middle-aged and elderly people. [36-38] This  
6  
7 258 indicates that the amount of muscle mass acquired during youth may protect adults from the  
8  
9 259 early onset of sarcopenia. Therefore, it may be beneficial to pay more attention to increasing  
10  
11 260 muscle mass in both young and old populations. The peak period of muscle strength lags  
12  
13 261 nearly 10 years behind the peak period of muscle mass and starts to decline at approximately  
14  
15 262 50 years of age. [39] The speed of muscle strength decline is 2 to 5 times faster than that of  
16  
17 263 muscle mass over the same period.[40]  
18  
19  
20

21 264 We found that the prevalence of pre-sarcopenia was stable in both genders from 1999 to  
22  
23 265 2006. It was also found that women had a higher prevalence of pre-sarcopenia than men in  
24  
25 266 2005-2006. This might be caused by a more rapid decrease in the prevalence of pre-  
26  
27 267 sarcopenia among men than women. Previous evidence, however, is inconsistent. For  
28  
29 268 instance, the study of Michele *et al.* found a higher prevalence of sarcopenia in men than in  
30  
31 269 women who were aged 64 to 93 years, [41] while the findings in the Fifth Korea National  
32  
33 270 Health and Nutrition Examination Survey showed that sarcopenia was more prevalent in  
34  
35 271 women. [42] Women have less absolute and relative muscle mass than men. [43] In addition,  
36  
37 272 given the natural differences in skeletal muscle between men and women, such as the amount  
38  
39 273 of muscle mass, muscle capillary density, and muscle fibre type, [44] physical activity might  
40  
41 274 be a potential cause for sex differences in the prevalence of sarcopenia. [45] In our study,  
42  
43 275 most women had lower self-reported levels of physical activity than men. Vigorous physical  
44  
45 276 activity in men gradually increased, whereas it decreased in women over time. Another  
46  
47 277 critical factor is age-related changes in gonadal function and sex hormones regulating muscle  
48  
49 278 mass distribution. Evidence suggests that lower serum testosterone levels in elderly men  
50  
51 279 contribute to muscle weakness. [46] Men experience a gradual decrease in knee extensor and  
52  
53 280 handgrip strength between 20 and 80 years of age, whereas women experience a steep decline  
54  
55  
56  
57  
58  
59  
60

1  
2  
3 281 after the age of 55 (menopausal age). [47 48] Although it is not clear whether age-related  
4  
5 282 changes in gonadal function directly regulate physical activity in humans, gonadectomy has  
6  
7  
8 283 been shown to cause a dramatic decline in spontaneous physical activity in animals. [49]  
9  
10 284 Thus, sex differences might be pivotal in understanding the process of sarcopenia and ageing,  
11  
12 285 and understanding why each sex remains “muscle healthy” throughout their lifespan could  
13  
14 286 open new avenues to prevent sarcopenia and the ageing process.

17 287 We also detected a considerably increased trend of pre-sarcopenia prevalence in non-  
18  
19 288 Hispanic black people, while the prevalence was stable in non-Hispanic whites and Mexican  
20  
21 289 Americans over time. Racial differences in muscle mass have been reported in previous  
22  
23 290 studies. Evidence has shown that African Americans have a significantly higher skeletal  
24  
25 291 muscle/adipose tissue-free body mass ratio than other races, although the difference was very  
26  
27 292 small. [50] Mahbubur and Abbey reported that black women had greater levels of total and  
28  
29 293 regional lean mass than white and Hispanic women and that Hispanic women had even lower  
30  
31 294 values than white women in an assessment of the body composition of 708 healthy black,  
32  
33 295 white, and Hispanic women aged 16–33 years using DXA analysis. [51] According to the  
34  
35 296 NHANES III bioelectrical impedance data, the amount of fat-free mass in Mexican  
36  
37 297 Americans was lower than that in non-Hispanic Blacks, which was in turn lower than that in  
38  
39 298 non-Hispanic Whites. [52] The underlying mechanism of these racial differences is still  
40  
41 299 unclear and warrants further investigation.

46 300 This is a representative population-based study. This is the first study that focused on pre-  
47  
48 301 sarcopenia among adults. However, there are several limitations in this study. First, we only  
49  
50 302 assessed muscle mass data rather than muscle strength, which does not reflect muscle power  
51  
52 303 and may be confounded by a third variable that was not involved in this study. Second, the  
53  
54 304 prevalence of pre-sarcopenia in women may be underestimated because we used a height-  
55  
56 305 adjusted definition of the condition, [53] which is potentially problematic in identifying  
57  
58  
59  
60

1  
2  
3 306 participants with sarcopenic obesity. [54] However, if we had used the weight-adjusted  
4  
5 307 definition, people classified as having pre-sarcopenia would have had higher BMI values  
6  
7  
8 308 compared with those without sarcopenia. [55] Third, as physical activity data were self-  
9  
10 309 reported, reporting bias may exist. Recent research on self-reported levels of physical activity  
11  
12 310 indicated that individuals in the U.S. tended to have differing perceptions of activity levels  
13  
14 311 and that compared to Europeans, U.S. individuals overestimate their time spent exercising.  
15  
16 312 [56] Future studies should apply objective measures to determine muscle strength and  
17  
18 313 physical activity to accurately evaluate sarcopenia prevalence.  
19  
20  
21 314

## 23 315 **CONCLUSIONS**

26 316 The overall prevalence of pre-sarcopenia was stable in both men and women from 1999-  
27  
28 317 2006 among U.S. adults, while there is a slight increase in the prevalence of pre-sarcopenia  
29  
30 318 from 1999 to 2006 among U.S. young adults. Adults who were elderly or under/normal  
31  
32 319 weight are at high-risk of pre-sarcopenia. Meanwhile, we found a significant increased trend  
33  
34 320 of obesity, central obesity, and pre-sarcopenia in non-Hispanic blacks and young adults. It  
35  
36 321 suggests that the high prevalence of pre-sarcopenia and obesity is an important public health  
37  
38 322 concern. It might be helpful to maintain resistant and at least moderate physical activity for  
39  
40 323 the prevention of sarcopenia and obesity in U.S. adults.  
41  
42  
43 324  
44  
45  
46  
47 325  
48  
49 326  
50  
51 327  
52  
53 328  
54  
55 329  
56  
57 330  
58  
59  
60



1  
2  
3 331 **Acknowledgements**  
4

5 332 We would like to thank Mr. Christopher Lavender for the discussion on the manuscript. We  
6  
7  
8 333 also appreciate the help of Yang Deng for assistance with data collection.  
9

10  
11 334 **Contributors**  
12

13 335 JBL, XZ and HJL designed and conducted the research; JBL, XZ and HJL analysed the data;  
14  
15 336 JBL, XZ, HJL, YWW and DTG were responsible for the final content of the manuscript; all  
16  
17  
18 337 authors took part in writing the manuscript and read and approved the final version.  
19  
20

21 338 **Funding**  
22

23  
24 339 This work was supported by NSFC (Natural Science Foundation of China, No.: 81703238)  
25  
26 340 (Dr. Xi Zhang, Yu-Wan Wu and Dan-Tong Gu).  
27  
28

29 341 **Competing interests**  
30

31  
32 342 None declared.  
33

34 343 **Patient consent for publication**  
35

36 344 Not required.  
37  
38

39 345 **Provenance and peer review**  
40

41 346 Not commissioned; externally peer reviewed.  
42

43 347 **Ethics approval**  
44

45  
46 348 All NHANES protocols were approved by the National Centre for Health Statistics Research  
47  
48 349 ethics review board.  
49

50  
51 350 **Data availability statement**  
52

53  
54 351 The data link is <https://www.cdc.gov/nchs/nhanes/index.htm>.  
55  
56 352  
57  
58  
59  
60

## 353 REFERENCES

- 354 1. Cruz-Jentoft AJ, Baeyens JP, Bauer JM, et al. Sarcopenia: European consensus on  
355 definition and diagnosis: Report of the European Working Group on Sarcopenia in  
356 Older People. *Age Ageing*. 2010;39:412-423.
- 357 2. Trajanoska K, Schoufour JD, Darweesh SK, et al. Sarcopenia and Its Clinical Correlates in  
358 the General Population: The Rotterdam Study. *J Bone Mine Res*. 2018;33(7):1209-  
359 1218.
- 360 3. Santilli V, Bernetti A, Mangone M, Paoloni M. Clinical definition of sarcopenia. *Clin*  
361 *Cases Miner Bone Metab*. 2014;11(3):177-180
- 362 4. Provan M, Mander T. Mobility, exercise, nutrition and healthy ageing to avoid sarcopenia.  
363 *Post Reprod Health*. 2018;24(2):98-102.
- 364 5. Lynch GS, Koopman R. Dietary meat and protection against sarcopenia. *Meat Sci*.  
365 2018;144:180–185.
- 366 6. Lee SG, Lee YH, Kim KJ, Lee W, Kwon OH, Kim JH. Additive association of vitamin D  
367 insufficiency and sarcopenia with low femoral bone mineral density in  
368 noninstitutionalized elderly population: the Korea National Health and Nutrition  
369 Examination Surveys 2009-2010. *Osteoporos Int*. 2013;24(11):2789-2799.
- 370 7. Wakabayashi H, Sakuma K. Comprehensive approach to sarcopenia treatment. *Curr Clin*  
371 *Pharmacol*. 2014;9(2):171-180
- 372 8. Fry CS, Lee JD, Mula J, et al. Inducible depletion of satellite cells in adult, sedentary mice  
373 impairs muscle regenerative capacity without affecting sarcopenia. *Nat Med*.  
374 2015;21(1):76-80.
- 375 9. Campos F, Abrigo J, Aguirre F, et al. Sarcopenia in a mice model of chronic liver disease:  
376 role of the ubiquitin-proteasome system and oxidative stress. *Pflugers Archiv*  
377 2018;470(10):1503–1519.
- 378 10. Roubenoff R. Sarcopenic obesity: does muscle loss cause fat gain? Lessons from  
379 rheumatoid arthritis and osteoarthritis. *Ann N Y Acad Sci*. 2000;904:553-557
- 380 11. Chen YC, Tu YK, Huang KC, Chen PC, Chu DC, Lee YL. Pathway from central obesity  
381 to childhood asthma. Physical fitness and sedentary time are leading factors. *Am J*  
382 *Respir Crit Care Med*. 2014;189(10):1194-1203.
- 383 12. Calvani R, Marini F, Cesari M, et al. Biomarkers for physical frailty and sarcopenia: state  
384 of the science and future developments. *J Cachexia Sarcopenia Muscle*.  
385 2015;6(4):278-286.
- 386 13. Kim SE. Clinical Implication of Sarcopenia in Patients with Inflammatory Bowel  
387 Disease. *Korean J Gastroenterol*. 2018;71(6):308-314.
- 388 14. Ryan E, McNicholas D, Creavin B, Kelly ME, Walsh T, Beddy D. Sarcopenia and  
389 Inflammatory Bowel Disease: A Systematic Review. *Inflamm Bowel Dis*.  
390 2019;1;25(1):67-73.
- 391 15. Han E, Lee YH, Kim BK, et al. Sarcopenia is associated with the risk of significant liver  
392 fibrosis in metabolically unhealthy subjects with chronic hepatitis B. *Aliment*  
393 *Pharmacol Ther*. 2018;48(3):300-312.
- 394 16. Hanai T, Shiraki M, Nishimura K, et al. Sarcopenia impairs prognosis of patients with  
395 liver cirrhosis. *Nutrition*. 2015;31(1):193-199.
- 396 17. Moctezuma-Velazquez C, Low G, Mourtzakis M, et al. Association between Low  
397 Testosterone Levels and Sarcopenia in Cirrhosis: A Cross-sectional Study. *Ann*  
398 *Hepatol*. 2018;17(4):615-623.
- 399 18. Bhanji RA, Moctezuma-Velazquez C, Duarte-Rojo A, et al. Myosteatorsis and sarcopenia  
400 are associated with hepatic encephalopathy in patients with cirrhosis. *Hepatol Int*.  
401 2018;12(4):377-386.

- 1  
2  
3 402 19. Siegert E, March C, Otten L, et al. Prevalence of sarcopenia in systemic sclerosis:  
4 403 Assessing body composition and functional disability in patients with systemic  
5 404 sclerosis. *Nutrition*. 2018;55-56:51-55.
- 6 405 20. Miyamoto Y, Baba Y, Sakamoto Y, et al. Sarcopenia is a Negative Prognostic Factor  
7 406 After Curative Resection of Colorectal Cancer. *Ann Surg Oncol*. 2015;22(8):2663-  
8 407 2668.
- 9 408 21. Voron T, Tselikas L, Pietrasz D, et al. Sarcopenia Impacts on Short- and Long-term  
10 409 Results of Hepatectomy for Hepatocellular Carcinoma. *Ann Surg*. 2015;261(6):1173-  
11 410 1183.
- 12 411 22. Joglekar S, Asghar A, Mott SL, et al. Sarcopenia Is an Independent Predictor of  
13 412 Complications Following Pancreatectomy for Adenocarcinoma. *J Surg Oncol*.  
14 413 2015;111(6):771-775.
- 15 414 23. Jones SE, Maddocks M, Kon SSC, et al. Sarcopenia in COPD: prevalence, clinical  
16 415 correlates and response to pulmonary rehabilitation. *Thorax*. 2015;70(3):213-218.
- 17 416 24. Chin SO, Rhee SY, Chon S, et al. Sarcopenia is independently associated with  
18 417 cardiovascular disease in older Korean adults: the Korea National Health and  
19 418 Nutrition Examination Survey (KNHANES) from 2009. *PLoS One*.  
20 419 2013;8(3):e60119.
- 21 420 25. Atkins JL, Whincup PH, Morris RW, Lennon LT, Papacosta O, Wannamethee SG.  
22 421 Sarcopenic obesity and risk of cardiovascular disease and mortality: a population-  
23 422 based cohort study of older men. *J Am Geriatr Soc*. 2014;62(2):253-260.
- 24 423 26. Kim YK, Lee HS, Ryu JJ, In Lee H, Seo SG. Sarcopenia increases the risk for mortality  
25 424 in patients who undergo amputation for diabetic foot. *J Foot Ankle Res*. 2018;11:32.
- 26 425 27. Plan and operation of the Third National Health and Nutrition Examination Survey, 1988-  
27 426 94. Series 1: programs and collection procedures. *Vital Health stat 1*. 1994(32):1-407
- 28 427 28. Flegal KM, Carroll MD, Kit BK, Ogden CL. Prevalence of obesity and trends in the  
29 428 distribution of body mass index among US adults, 1999-2010. *JAMA*.  
30 429 2012;307(5):491-497.
- 31 430 29. Obesity: Preventing and managing the global epidemic: Report of a WHO consultation on  
32 431 obesity. *World Health Organ Tech Rep Ser*. 2000;894:i-253.
- 33 432 30. Cruz-Jentoft AJ, Baeyens JP, Bauer JM, et al. Sarcopenia: European consensus on  
34 433 definition and diagnosis: Report of the European Working Group on Sarcopenia in  
35 434 Older People. *Age Ageing*. 2010;39(4):412-423.
- 36 435 31. Menke A, Casagrande S, Geiss L, Cowie CC. Prevalence of and Trends in Diabetes  
37 436 Among Adults in the United States, 1988-2012. *JAMA*. 2015;314(10):1021-9.
- 38 437 32. Flegal KM, Carroll MD, Ogden CL, Curtin LR. Prevalence and trends in obesity among  
39 438 US adults, 1999-2008. *JAMA*. 2010;303(3):235-241.
- 40 439 33. Wannamethee SG, Atkins JL. Muscle loss and obesity: the health implications of  
41 440 sarcopenia and sarcopenic obesity. *Proc Nutr Soc*. 2015;74(4):405-412.
- 42 441 34. Cleasby ME, Jamieson PM, Atherton PJ. Insulin resistance and sarcopenia: mechanistic  
43 442 links between common co-morbidities. *J Endocrinol*. 2016;229(2):R67-R81.
- 44 443 35. Janssen I, Heymsfield SB, Wang ZM, Ross R. Skeletal muscle mass and distribution in  
45 444 468 men and women aged 18-88 yr. *J Appl Physiol*. 2000;89(1):81-88.
- 46 445 36. Newman AB, Haggerty CL, Goodpaster B, et al. Strength and muscle quality in a well-  
47 446 functioning cohort of older adults: the Health, Aging and Body Composition Study. *J*  
48 447 *Am Geriatr Soc*. 2003;51(3):323-330
- 49 448 37. Rolland Y, Czerwinski S, Abellan Van Kan G, et al. Sarcopenia: its assessment, etiology,  
50 449 pathogenesis, consequences and future perspectives. *J Nutr Health Aging*.  
51 450 2008;12(7):433-450
- 52  
53  
54  
55  
56  
57  
58  
59  
60

- 1  
2  
3 451 38. Goodpaster BH, Park SW, Harris TB, et al. The loss of skeletal muscle strength, mass,  
4 452 and quality in older adults: the health, aging and body composition study. *J Gerontol*  
5 453 *A Biol Sci Med Sci*. 2006;61(10):1059-1064  
6 454 39. Silva AM, Shen W, Heo M, et al. Ethnicity-Related Skeletal Muscle Differences Across  
7 455 the Lifespan. *Am J Hum Biol*. 2010;22(1):76-82.  
8 456 40. Delmonico MJ, Harris TB, Visser M, et al. Longitudinal study of muscle strength,  
9 457 quality, and adipose tissue infiltration. *Am J Clin Nutr*. 2009;90(6):1579-1585.  
10 458 41. Iannuzzi-Sucich M, Prestwood KM, Kenny AM. Prevalence of sarcopenia and predictors  
11 459 of skeletal muscle mass in healthy, older men and women. *J Gerontol A Biol Sci Med*  
12 460 *Sci*. 2002;57(12):M772-M777.  
13 461 42. Hong N, Lee EY, Kim CO. Gamma-glutamyl transferase is associated with sarcopenia  
14 462 and sarcopenic obesity in community-dwelling older adults: results from the Fifth  
15 463 Korea National Health and Nutrition Examination Survey, 2010-2011. *Endocr J*.  
16 464 2015;62(7):585-592.  
17 465 43. Marcellino C, Henn RL, Olinto MT, Bressan AW, Paniz VM, Pattussi MP. Physical  
18 466 inactivity and associated factors among women from a municipality in southern  
19 467 Brazil. *J Phys Act Health*. 2014;11(4):777-783.  
20 468 44. Kim J. Gender difference in association between appendicular skeletal muscle mass and  
21 469 cardiometabolic abnormalities in normal-weight and obese adults: Korea National  
22 470 Health and Nutrition Examination Survey (KNHANES) IV-3 and V-1. *Asia Pac J*  
23 471 *Public Health*. 2015;27(2):NP468-475.  
24 472 45. Genton L, Karsegard VL, Chevalley T, Kossovsky MP, Darmon P, Pichard C. Body  
25 473 composition changes over 9 years in healthy elderly subjects and impact of physical  
26 474 activity. *Clin Nutr*. 2011;30(4):436-442.  
27 475 46. Doherty TJ. Invited review: Aging and sarcopenia. *J Appl Physiol* (1985).  
28 476 2003;95(4):1717-1727.  
29 477 47. Samson MM, Meeuwse IB, Crowe A, Dessens JA, Duursma SA, Verhaar HJ.  
30 478 Relationships between physical performance measures, age, height and body weight  
31 479 in healthy adults. *Age Ageing*. 2000;29(3):235-242  
32 480 48. Phillips SK, Rook KM, Siddle NC, Bruce SA, Woledge RC. Muscle weakness in women  
33 481 occurs at an earlier age than in men, but strength is preserved by hormone  
34 482 replacement therapy. *Clin Sci*. 1993;84(1):95-98  
35 483 49. Rosenfeld CS. Sex-dependent differences in voluntary physical activity. *J Neurosci Res*.  
36 484 2017;95(1-2):279-290.  
37 485 50. Wang Z, Heo M, Lee RC, Kotler DP, Withers RT, Heymsfield SB. Muscularity in adult  
38 486 humans: proportion of adipose tissue-free body mass as skeletal muscle. *Am J Hum*  
39 487 *Biol*. 2001;13(5):612-619.  
40 488 51. Rahman M, Berenson AB. Racial difference in lean mass distribution among  
41 489 reproductive-aged women. *Ethn Dis*. 2010;20(4):346-352  
42 490 52. Chumlea WC, Guo SS, Kuczmarski RJ, et al. Body composition estimates from  
43 491 NHANES III bioelectrical impedance data. *Int J Obes Relat Metab Disord*.  
44 492 2002;26(12):1596-1609.  
45 493 53. Meng NH, Li CI, Liu CS, et al. Comparison of height- and weight-adjusted sarcopenia in  
46 494 a Taiwanese metropolitan older population. *Geriatr Gerontol Int* 2015;15(1):45-53.  
47 495 54. Kim YS, Lee Y, Chung YS, et al. Prevalence of sarcopenia and sarcopenic obesity in the  
48 496 Korean population based on the Fourth Korean National Health and Nutritional  
49 497 Examination Surveys. *J Gerontol A Biol Sci Med Sci*. 2012;67(10):1107-1113.  
50 498 55. Janssen I, Heymsfield SB, Ross R. Low relative skeletal muscle mass (sarcopenia) in  
51 499 older persons is associated with functional impairment and physical disability. *J Am*  
52 500 *Geriatr Soc*. 2002;50(5):889-896

1  
2  
3 501 56. Kapteyn A, Banks J, Hamer M, et al. What they say and what they do: comparing  
4 502 physical activity across the USA, England and the Netherlands. *J Epidemiol*  
5 503 *Community Health*. 2018;72(6):471-476.  
6  
7 504  
8  
9 505  
10  
11  
12  
13  
14  
15  
16  
17  
18  
19  
20  
21  
22  
23  
24  
25  
26  
27  
28  
29  
30  
31  
32  
33  
34  
35  
36  
37  
38  
39  
40  
41  
42  
43  
44  
45  
46  
47  
48  
49  
50  
51  
52  
53  
54  
55  
56  
57  
58  
59  
60

For peer review only

1  
2  
3 506 **Figure Legends**  
4

5  
6 507 **Figure 1.** Prevalence of obesity stratified by sex (A), age (B) and racial group (C) from 1999  
7 508 to 2006 in the NHANES surveys. 95% CI: 95% confidence interval. P values refer to  
8 509 temporal trends obtained by logistic regression models after adjusting for sex, age, race,  
9 510 education level, annual household income, time spent watching TV per day, and physical  
10 511 activity level.  
11  
12  
13

14  
15 512 **Figure 2.** Distribution of body composition measurements, including SMI (A), WC (B),  
16 513 BMD (C), and TPF (D), by sex, age and racial group from 1999 to 2006. SMI: Skeletal  
17 514 muscle index; WC: Waist circumference; BMD: Bone mineral density; TPF: Total percentage  
18 515 of body fat; 95% CI: 95% confidence interval. P values refer to temporal trends obtained by  
19 516 logistic regression models after adjusting for sex, age, race, education level, annual household  
20 517 income, time spent watching TV per day, and physical activity level.  
21  
22  
23  
24  
25  
26  
27  
28  
29  
30  
31  
32  
33  
34  
35  
36  
37  
38  
39  
40  
41  
42  
43  
44  
45  
46  
47  
48  
49  
50  
51  
52  
53  
54  
55  
56  
57  
58  
59  
60

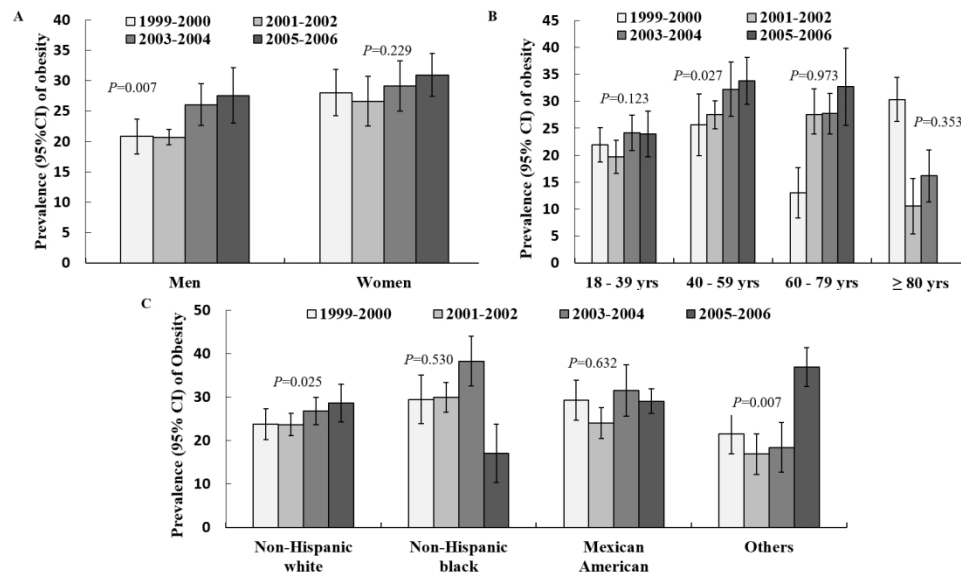

Figure 1. Prevalence of obesity stratified by sex (A), age (B) and racial group (C) from 1999 to 2006 in the NHANES surveys. 95% CI: 95% confidence interval. P values refer to temporal trends obtained by logistic regression models after adjusting for sex, age, race, education level, annual household income, time spent watching TV per day, and physical activity level

296x182mm (150 x 150 DPI)

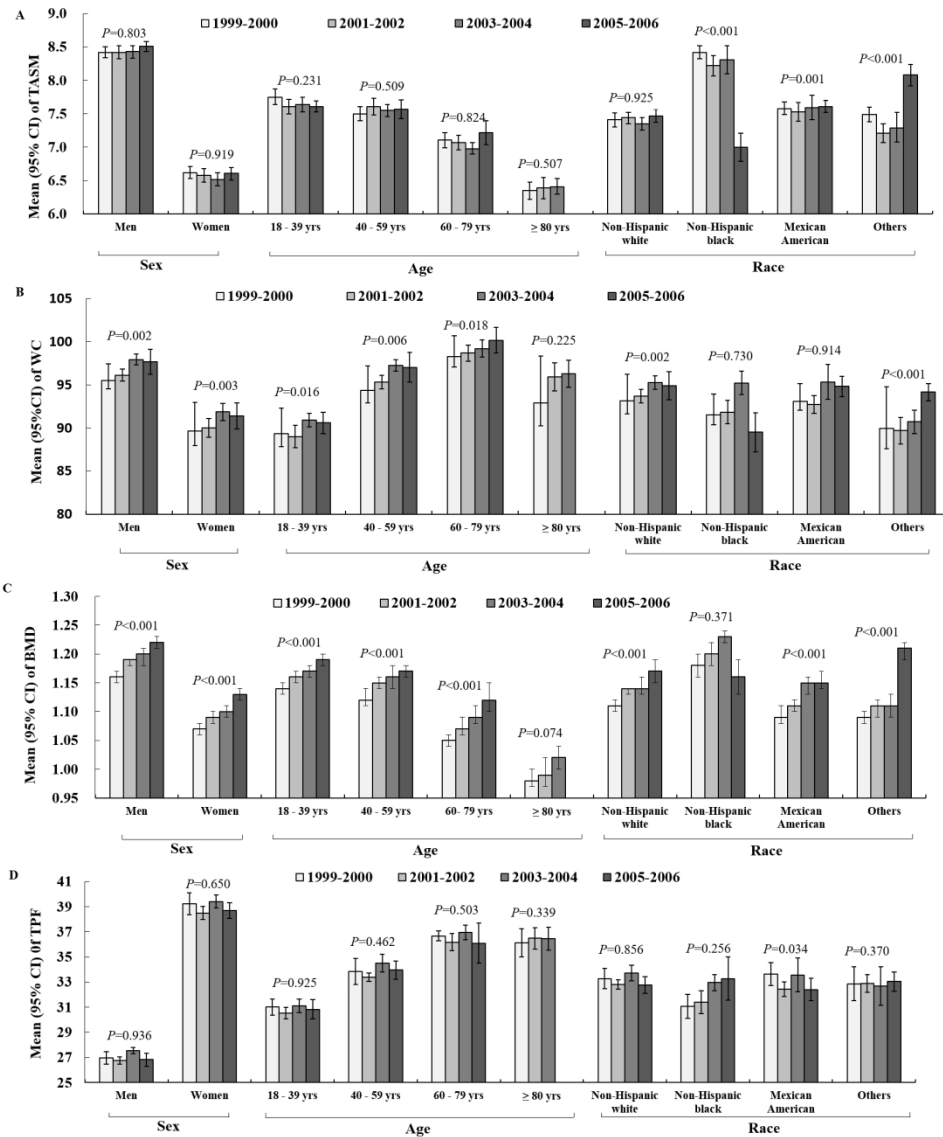

Figure 2. Distribution of body composition measurements, including SMI (A), WC (B), BMD (C), and TPF (D), by sex, age and racial group from 1999 to 2006. SMI: Skeletal muscle index; WC: Waist circumference; BMD: Bone mineral density; TPF: Total percentage of body fat; 95% CI: 95% confidence interval. P values refer to temporal trends obtained by logistic regression models after adjusting for sex, age, race, education level, annual household income, time spent watching TV per day, and physical activity level.

325x376mm (150 x 150 DPI)



STROBE Statement—Checklist of items that should be included in reports of *cross-sectional studies*

|                           | Item No      | Recommendation                                                                                                                                                                                                                                                                                                                                                                                                |
|---------------------------|--------------|---------------------------------------------------------------------------------------------------------------------------------------------------------------------------------------------------------------------------------------------------------------------------------------------------------------------------------------------------------------------------------------------------------------|
| <b>Title and abstract</b> | Page: 1, 3   | (a) Indicate the study's design with a commonly used term in the title or the abstract<br>(b) Provide in the abstract an informative and balanced summary of what was done and what was found                                                                                                                                                                                                                 |
| <b>Introduction</b>       |              |                                                                                                                                                                                                                                                                                                                                                                                                               |
| Background/rationale      | Page: 5-6    | Explain the scientific background and rationale for the investigation being reported                                                                                                                                                                                                                                                                                                                          |
| Objectives                | Page: 6      | State specific objectives, including any prespecified hypotheses                                                                                                                                                                                                                                                                                                                                              |
| <b>Methods</b>            |              |                                                                                                                                                                                                                                                                                                                                                                                                               |
| Study design              | Page: 6      | Present key elements of study design early in the paper                                                                                                                                                                                                                                                                                                                                                       |
| Setting                   | Page: 6      | Describe the setting, locations, and relevant dates, including periods of recruitment, exposure, follow-up, and data collection                                                                                                                                                                                                                                                                               |
| Participants              | Page: 6      | (a) Give the eligibility criteria, and the sources and methods of selection of participants                                                                                                                                                                                                                                                                                                                   |
| Variables                 | Page: 6-7    | Clearly define all outcomes, exposures, predictors, potential confounders, and effect modifiers. Give diagnostic criteria, if applicable                                                                                                                                                                                                                                                                      |
| Data sources/measurement  | Page: 6-7    | For each variable of interest, give sources of data and details of methods of assessment (measurement). Describe comparability of assessment methods if there is more than one group                                                                                                                                                                                                                          |
| Bias                      | Page: 7-8    | Describe any efforts to address potential sources of bias                                                                                                                                                                                                                                                                                                                                                     |
| Study size                | Page: 6      | Explain how the study size was arrived at                                                                                                                                                                                                                                                                                                                                                                     |
| Quantitative variables    | Page: 7-8    | Explain how quantitative variables were handled in the analyses. If applicable, describe which groupings were chosen and why                                                                                                                                                                                                                                                                                  |
| Statistical methods       | Page: 7-8    | (a) Describe all statistical methods, including those used to control for confounding<br>(b) Describe any methods used to examine subgroups and interactions<br>(c) Explain how missing data were addressed<br>(d) If applicable, describe analytical methods taking account of sampling strategy<br>(e) Describe any sensitivity analyses                                                                    |
| <b>Results</b>            |              |                                                                                                                                                                                                                                                                                                                                                                                                               |
| Participants              | Page: 8      | (a) Report numbers of individuals at each stage of study—eg numbers potentially eligible, examined for eligibility, confirmed eligible, included in the study, completing follow-up, and analysed<br>(b) Give reasons for non-participation at each stage<br>(c) Consider use of a flow diagram                                                                                                               |
| Descriptive data          | Page: 8-9    | (a) Give characteristics of study participants (eg demographic, clinical, social) and information on exposures and potential confounders<br>(b) Indicate number of participants with missing data for each variable of interest                                                                                                                                                                               |
| Outcome data              | Page: 12, 15 | Report numbers of outcome events or summary measures                                                                                                                                                                                                                                                                                                                                                          |
| Main results              | Page: 12, 15 | (a) Give unadjusted estimates and, if applicable, confounder-adjusted estimates and their precision (eg, 95% confidence interval). Make clear which confounders were adjusted for and why they were included<br>(b) Report category boundaries when continuous variables were categorized<br>(c) If relevant, consider translating estimates of relative risk into absolute risk for a meaningful time period |
| Other analyses            | Page: 12     | Report other analyses done—eg analyses of subgroups and interactions, and sensitivity                                                                                                                                                                                                                                                                                                                         |

1  
2  
3  
4  
5  
6  
7  
8  
9  
10  
11  
12  
13  
14  
15  
16  
17  
18  
19  
20  
21  
22  
23  
24  
25  
26  
27  
28  
29  
30  
31  
32  
33  
34  
35  
36  
37  
38  
39  
40  
41  
42  
43  
44  
45  
46  
47  
48  
49  
50  
51  
52  
53  
54  
55  
56  
57  
58  
59  
60

---

analyses

---



---

**Discussion**

---

|                  |             |                                                                                                                                                                            |
|------------------|-------------|----------------------------------------------------------------------------------------------------------------------------------------------------------------------------|
| Key results      | Page: 17    | Summarise key results with reference to study objectives                                                                                                                   |
| Limitations      | Page: 19-20 | Discuss limitations of the study, taking into account sources of potential bias or imprecision. Discuss both direction and magnitude of any potential bias                 |
| Interpretation   | Page: 17-20 | Give a cautious overall interpretation of results considering objectives, limitations, multiplicity of analyses, results from similar studies, and other relevant evidence |
| Generalisability | Page: 18    | Discuss the generalisability (external validity) of the study results                                                                                                      |

---

**Other information**

---

|         |          |                                                                                                                                                               |
|---------|----------|---------------------------------------------------------------------------------------------------------------------------------------------------------------|
| Funding | Page: 21 | Give the source of funding and the role of the funders for the present study and, if applicable, for the original study on which the present article is based |
|---------|----------|---------------------------------------------------------------------------------------------------------------------------------------------------------------|

---

\*Give information separately for exposed and unexposed groups.

**Note:** An Explanation and Elaboration article discusses each checklist item and gives methodological background and published examples of transparent reporting. The STROBE checklist is best used in conjunction with this article (freely available on the Web sites of PLoS Medicine at <http://www.plosmedicine.org/>, Annals of Internal Medicine at <http://www.annals.org/>, and Epidemiology at <http://www.epidem.com/>). Information on the STROBE Initiative is available at [www.strobe-statement.org](http://www.strobe-statement.org).

# BMJ Open

## Prevalence and Temporal Trends of Pre-sarcopenia Metrics and Related Body Composition Measurements from the 1999-2006 NHANES survey

|                                 |                                                                                                                                                                                                                                                                                                                                                                                                                                                                                                                 |
|---------------------------------|-----------------------------------------------------------------------------------------------------------------------------------------------------------------------------------------------------------------------------------------------------------------------------------------------------------------------------------------------------------------------------------------------------------------------------------------------------------------------------------------------------------------|
| Journal:                        | <i>BMJ Open</i>                                                                                                                                                                                                                                                                                                                                                                                                                                                                                                 |
| Manuscript ID                   | bmjopen-2019-034495.R3                                                                                                                                                                                                                                                                                                                                                                                                                                                                                          |
| Article Type:                   | Original research                                                                                                                                                                                                                                                                                                                                                                                                                                                                                               |
| Date Submitted by the Author:   | 06-Jun-2020                                                                                                                                                                                                                                                                                                                                                                                                                                                                                                     |
| Complete List of Authors:       | Li, Ji-Bin; Sun Yat-sen University Cancer Center, Department of Clinical Research<br>Wu, Yuwan; Xinhua Hospital Affiliated to Shanghai Jiaotong University School of Medicine<br>Gu, Dantong; Fudan University School of Public Health, Department of Bio-statistics<br>Li, Huajun; Xinhua Hospital Affiliated to Shanghai Jiaotong University School of Medicine, Department of Pediatrics<br>Zhang, Xi; Xinhua Hospital Affiliated to Shanghai Jiaotong University School of Medicine, Clinical Research Unit |
| <b>Primary Subject Heading</b>: | Epidemiology                                                                                                                                                                                                                                                                                                                                                                                                                                                                                                    |
| Secondary Subject Heading:      | Epidemiology                                                                                                                                                                                                                                                                                                                                                                                                                                                                                                    |
| Keywords:                       | Body Composition, PUBLIC HEALTH, EPIDEMIOLOGY                                                                                                                                                                                                                                                                                                                                                                                                                                                                   |
|                                 |                                                                                                                                                                                                                                                                                                                                                                                                                                                                                                                 |

SCHOLARONE™  
Manuscripts



I, the Submitting Author has the right to grant and does grant on behalf of all authors of the Work (as defined in the below author licence), an exclusive licence and/or a non-exclusive licence for contributions from authors who are: i) UK Crown employees; ii) where BMJ has agreed a CC-BY licence shall apply, and/or iii) in accordance with the terms applicable for US Federal Government officers or employees acting as part of their official duties; on a worldwide, perpetual, irrevocable, royalty-free basis to BMJ Publishing Group Ltd ("BMJ") its licensees and where the relevant Journal is co-owned by BMJ to the co-owners of the Journal, to publish the Work in this journal and any other BMJ products and to exploit all rights, as set out in our [licence](#).

The Submitting Author accepts and understands that any supply made under these terms is made by BMJ to the Submitting Author unless you are acting as an employee on behalf of your employer or a postgraduate student of an affiliated institution which is paying any applicable article publishing charge ("APC") for Open Access articles. Where the Submitting Author wishes to make the Work available on an Open Access basis (and intends to pay the relevant APC), the terms of reuse of such Open Access shall be governed by a Creative Commons licence – details of these licences and which [Creative Commons](#) licence will apply to this Work are set out in our licence referred to above.

Other than as permitted in any relevant BMJ Author's Self Archiving Policies, I confirm this Work has not been accepted for publication elsewhere, is not being considered for publication elsewhere and does not duplicate material already published. I confirm all authors consent to publication of this Work and authorise the granting of this licence.

1  
2  
3 **1 Prevalence and Temporal Trends of Pre-sarcopenia Metrics and Related Body**  
4  
5 **2 Composition Measurements from the 1999-2006 NHANES survey**  
6  
7

8 3 Ji-Bin Li <sup>1</sup>, Yu-Wan Wu <sup>2</sup>, Dan-Tong Gu <sup>3</sup>, Hua-Jun Li <sup>2\*</sup>, Xi Zhang <sup>4\*</sup>  
9

10 4 **Affiliations:**

- 11  
12  
13 5 1. Department of Clinical Research, Sun Yat-sen University Cancer Center; State Key  
14 Laboratory of Oncology in Southern China; Collaborative Innovation Center for  
15 6 Cancer Medicine, Guangzhou 510060, China.  
16  
17 7  
18 19 2. Department of Pediatrics, Xin Hua Hospital, Shanghai Jiao Tong University  
20 School of Medicine, Shanghai, China  
21 9  
22  
23 24 3. Department of Bio-statistics, School of Public Health, Fudan University, Shanghai,  
25 11 China.  
26  
27 28 12 4. Clinical Research Unit, Xin Hua Hospital, Shanghai Jiao Tong University School of  
29 13 Medicine, Shanghai, China.  
30  
31  
32  
33

34 15 **Short title:** Trends of Pre-sarcopenia Metrics among U.S. Adults  
35  
36

37 16 \* Corresponding author  
38  
39

40 17 **Correspondence to**

41 18 Xi Zhang, PhD

42  
43  
44 19 Clinical Research Unit, Xin Hua Hospital, Shanghai Jiao Tong University School of  
45 20 Medicine, 1665 Kongjiang Road, Kejiao Building 233B, Shanghai, China 200092.

46  
47 21 Tel: +86-021-2507-7482;

48  
49 22 Fax: +86-021-2507-7480;

50  
51 23 E-mail: zhangxi@xinhumed.com.cn  
52  
53  
54  
55

56 24  
57 25 Hua-Jun Li, PhD  
58  
59  
60

1  
2  
3  
4  
5  
6  
7  
8  
9  
10  
11  
12  
13  
14  
15  
16  
17  
18  
19  
20  
21  
22  
23  
24  
25  
26  
27  
28  
29  
30  
31  
32  
33  
34  
35  
36  
37  
38  
39  
40  
41  
42  
43  
44  
45  
46  
47  
48  
49  
50  
51  
52  
53  
54  
55  
56  
57  
58  
59  
60

26 Department of Pediatrics, Xin Hua Hospital, Shanghai Jiao Tong University School of  
27 Medicine, No. 1665 Kongjiang Road, Shanghai, China 200092.

28 Tel: +86-021-2507-6794;

29 E-mail: lihuajun@xinquamed.com.cn

30

31 **Word count:** 2890

For peer review only

## 32 **Abstract**

33 **Objective:** To evaluate the prevalence and temporal trends of pre-sarcopenia and related  
34 body composition measurements.

35 **Design:** Cross-sectional study.

36 **Setting:** National Health and Nutrition Examination Survey (NHANES) 1999-2006.

37 **Methods:** Pre-sarcopenia was defined according to the guidelines from the European  
38 Working Group on Sarcopenia. Logistic or linear regression models were used to evaluate the  
39 linear trend of the prevalence of pre-sarcopenia, obesity, and related body composition  
40 measurements.

41 **Participants:** A total of 29,947 participants aged 18 - 90 years from five waves of the  
42 NHANES were included in the analysis.

43 **Outcome measures:** Pre-sarcopenia was sex-specifically defined as having a skeletal mass  
44 index  $\leq 7.26$  kg/m<sup>2</sup> in men and  $\leq 5.5$  kg/m<sup>2</sup> in women. Body composition measurements,  
45 including total body fat percentage, total body fat mass, total lean body mass, appendicular  
46 skeletal muscle mass (ASM) and bone mineral density (BMD), were obtained by dual energy  
47 X-ray absorptiometry.

48 **Results:** The overall prevalence of pre-sarcopenia ranged from 16.4% in 1999-2000 to 14.8%  
49 in 2005-2006 ( $P$  for trend=0.78). Pre-sarcopenia was stable in both males ( $P$  for trend=0.36)  
50 and females ( $P$  for trend=0.20). The pre-sarcopenia prevalence was significantly elevated  
51 among the 18- to 39-year-old age group (from 11.3% to 14.1%,  $P$  for trend = 0.04) and  
52 among non-Hispanic blacks ( $P$  for trend < 0.001). Adults aged  $\geq 80$  years old had the highest  
53 prevalence.

54 **Conclusions:** The prevalence of pre-sarcopenia increased among young individuals over  
55 time. Non-Hispanic blacks also demonstrated an increasing trend in the prevalence over time.

56 **Keywords:** Pre-sarcopenia Metrics; Body Composition; Temporal Trends.

1  
2  
3 57  
4  
5 58  
6  
7  
8 59  
9  
10 60  
11  
12 61  
13  
14 62  
15  
16 63  
17  
18 64  
19  
20 65  
21  
22 66  
23  
24 67  
25  
26 68  
27  
28 69  
29  
30 70  
31  
32 71  
33  
34  
35  
36  
37  
38  
39  
40  
41  
42  
43  
44  
45  
46  
47  
48  
49  
50  
51  
52  
53  
54  
55  
56  
57  
58  
59  
60

### **Strengths and limitations of this study**

- We used the data from the nationally representative population-based surveys of the NHANES (1999-2006).
- Body composition measurements were obtained by the gold standard dual energy X-ray absorptiometry.
- Appendicular skeletal muscle mass rather than muscle strength and physical performance was assessed.
- The prevalence of pre-sarcopenia in women may be underestimated when using a height-adjusted definition of pre-sarcopenia.
- Reporting bias may exist due to self-reported physical activity data.



## 72 INTRODUCTION

73 According to the 2010 European Working Group on Sarcopenia in Older People  
74 (EWGSOP), sarcopenia is defined as a cluster of geriatric conditions characterized by  
75 progressive and generalized loss of skeletal muscle mass and strength with a high risk of  
76 adverse outcomes, including poor quality of life, physical disability, and even death. [1] The  
77 prevalence of pre-sarcopenia (5.9%) and sarcopenia (4.4%) among adults aged 45 years and  
78 older is high in the Netherlands [2]. It has been conservatively estimated that sarcopenia affects  
79 more than 50 million people around the world and will increase by more than 200 million over  
80 the next 40 years. [3]

81 Currently, there are a variety of definitions for sarcopenia, none of which have been  
82 agreed upon, and the prevalence of the disease is highly dependent on the diagnostic criteria  
83 used. Among the three components of sarcopenia defined in the EWGSOP, muscle mass,  
84 muscle strength, and performance, muscle mass plays a critical role in the progression of  
85 sarcopenia, and low muscle mass has been identified as pre-sarcopenia. Sarcopenia, especially  
86 in the context low skeletal muscle mass, is mainly caused by ageing, decreased participation in  
87 physical activities, [4] malnutrition, [5 6] and endocrine and metabolic disorders. [7] These  
88 factors directly contribute to the loss of muscle mass, [8] influencing muscle strength and  
89 performance and leading to a lower metabolic rate and reduced physical activity, which often  
90 causes fat gain. The gained fat could lead to a further loss of muscle mass and strength via  
91 cytokine protein catabolism [9] and insulin resistance. [10] Thus, sarcopenia and its effects can  
92 be part of a spiralling process of declining health.

93 Sarcopenic obesity, defined as a loss in body lean mass but preservation or even an  
94 increase in body fat mass, can have serious health implications. Recent data has indicated that  
95 obesity affects more people of younger age due to physical inactivity. [11] Therefore, it is  
96 reasonable to hypothesize that the prevalence of pre-sarcopenia has increased accordingly.

1  
2  
3 97 Currently, there is a lack of evidence to support this statement. Numerous studies have reported  
4  
5 98 that sarcopenia/low muscle mass is related to frailty, [12] inflammation, [13 14] liver fibrosis,  
6  
7  
8 99 [15 16] cirrhosis, [17 18] systemic sclerosis, [19] cancer, [20-22] chronic obstructive  
9  
10 100 pulmonary disease, [23] cardiovascular disease (CVD), [24 25] and mortality, [26] all of which  
11  
12 101 place considerable health and economic burdens on public health care services. Thus, it is  
13  
14 102 important to depict the prevalence and temporal trends of pre-sarcopenia and related body  
15  
16 103 composition measurements over time in relation to sex, age, and race to better inform public  
17  
18 104 health policy and prevention strategies.

19  
20  
21 105 In this study, we estimated the population-based prevalence and temporal trends of pre-  
22  
23 106 sarcopenia metrics and related body composition measurements among adults in the United  
24  
25 107 States (U.S.) from 1999 to 2006 by using data from the National Health and Nutrition  
26  
27 108 Examination Survey (NHANES).

## 109 110 **METHODS**

### 111 **Study design and participants**

112 The NHANES is a nationally representative cross-sectional survey among non-  
113 institutionalized civilians in the U.S. [27] This analytical study involved participants aged 18  
114 years and older from the NHANES cohort surveyed across four consecutive cycles: 1999-2000  
115 ( $n=3,559$ ), 2001-2002 ( $n=4,047$ ), 2003-2004 ( $n=3,771$ ), and 2005-2006 ( $n=3,071$ ). All  
116 NHANES protocols were approved by the National Centre for Health Statistics Research ethics  
117 review board. All participants provided written informed consent.

### 118 **Body component measurements and pre-sarcopenia**

119 Physical examinations were conducted in mobile examination centres. Weight in  
120 kilograms, height in centimetres, and waist circumference (WC) in centimetres were measured  
121 using standardized techniques and equipment. Body mass index (BMI) was calculated as

1  
2  
3 122 weight in kilograms divided by the square of the height in metres. Overweight was defined as  
4  
5 123 a BMI between 25.0-29.9 and obesity as a BMI of 30.0 or higher. [28] Central obesity was  
6  
7 124 defined as having a WC of > 102 cm for males and > 88 cm for females. [29] Total body fat  
8  
9 125 percentage, total body fat mass, total lean body mass, appendicular skeletal muscle mass (ASM)  
10  
11 126 and bone mineral density (BMD) were measured using dual energy X-ray absorptiometry  
12  
13 127 (DXA) in the four surveys from 1999 to 2006. The total appendicular skeletal muscle mass  
14  
15 128 index (TASM) was calculated as the ASM divided by the height squared ( $\text{kg}/\text{m}^2$ ). Pre-  
16  
17 129 sarcopenia was sex-specifically defined as having a TASM  $\leq 7.26 \text{ kg}/\text{m}^2$  in men and  $\leq 5.5$   
18  
19 130  $\text{kg}/\text{m}^2$  in women. [30]

### 131 **Physical activity and social-demographic factors**

132 Participants' sex, age, race, education level, annual household income, time spent  
133 watching television per day, and level of physical activity were collected by household  
134 interviews. Age was grouped into three categories: 18 to 39 years old, 40 to 59 years old, and  
135 60 years or older. Race was classified as non-Hispanic white, non-Hispanic black, Mexican  
136 American, and others. Educational level was categorized into < high school graduate, high  
137 school graduate/general equivalency diploma, or  $\geq$  college. Time spent watching TV per day  
138 was grouped into < 2 h, 2–4 h, or > 4 h. Annual household income was grouped into <  
139 \$25000, \$25000 to \$55000, or > \$55000. Physical activity was grouped into two levels:  
140 moderate/below or vigorous.

### 141 **Statistical analyses**

142 Participants' characteristics, including sex, age, race, education level, annual household  
143 income, time spent watching TV per day and level of physical activity, are shown as  
144 unweighted frequencies and weighted percentages with 95% confidence intervals. Weighted  
145 means and corresponding 95% confidence intervals of body weight, BMI and obesity, WC

1  
2  
3 146 and central obesity, total body fat percentage, total lean body mass, ASM, TASM, and BMD  
4  
5 147 were calculated, and mean changes with 95% confidence intervals (CIs) of all these variables  
6  
7  
8 148 from 1999-2000 to 2005-2006 were calculated.

9  
10 149 The age- and sex-adjusted prevalence of pre-sarcopenia was calculated for the four  
11  
12 150 survey cycles from 1999-2000 to 2005-2006 for the overall sample and the sex, age, race,  
13  
14 151 education level, annual household income, time spent watching TV per day, and physical  
15  
16 152 activity level subgroups. The temporal trends of pre-sarcopenia prevalence, obesity and  
17  
18 153 different body composition measurements, including TASM, WC, BMD, and TPF, for the  
19  
20 154 overall sample and within the subgroups were assessed by survey-weighted linear (for  
21  
22 155 continuous outcomes) or logistic (for binary outcomes) regression models with survey year as  
23  
24 156 a continuous (ordered categorical) independent variable after adjustment for sex, age, race,  
25  
26 157 education level, annual household income, time spent watching TV per day, and physical  
27  
28 158 activity level [31 32].

29  
30  
31  
32  
33 159 Sampling weights were used to account for unequal probabilities of selection and  
34  
35 160 nonresponses for all analyses, thereby providing estimates representative of the non-  
36  
37 161 institutionalized civilian U.S. population. All statistical analyses were performed using SAS  
38  
39 162 for Windows version 9.4 (SAS Institute, Cary, NC, USA). A two-sided  $P < 0.05$  was  
40  
41 163 considered statistically significant.

#### 42 164 **Patient and public involvement**

43  
44  
45 165 There was no patient or public involvement in this study.

#### 46 47 48 49 50 51 167 **RESULTS**

52  
53 168 A total of 14,448 participants were included in this study, with 3,559 from 1999-2000,  
54  
55 169 4,047 from 2001-2002, 3,771 from 2003-2004, and 3,071 from 2005-2006 (**Table 1**). The  
56  
57 170 distributions of the participants' characteristics across the four survey cycles were comparable.

1  
2  
3 171 In 1999-2000, 49.6% of the participants were women, 19.5% were 60 years or older, and 71.7%  
4  
5 172 were non-Hispanic white. The proportion of patients with a vigorous physical activity level  
6  
7 173 showed a significantly decreasing trend from 1999 to 2006 ( $P < 0.001$ ).  
8  
9  
10  
11  
12  
13  
14  
15  
16  
17  
18  
19  
20  
21  
22  
23  
24  
25  
26  
27  
28  
29  
30  
31  
32  
33  
34  
35  
36  
37  
38  
39  
40  
41  
42  
43  
44  
45  
46  
47  
48  
49  
50  
51  
52  
53  
54  
55  
56  
57  
58  
59  
60

For peer review only

174

**Table 1. Participants' characteristics (weighted) from the NHANES surveys, 1999-2006**

| Characteristics                                           | No. weighted (%)         |                          |                          |                          |
|-----------------------------------------------------------|--------------------------|--------------------------|--------------------------|--------------------------|
|                                                           | 1999-2000 (n = 3559)     | 2001-2002 (n = 4047)     | 2003-2004 (n = 3771)     | 2005-2006 (n = 3071)     |
| <b>Sex</b>                                                |                          |                          |                          |                          |
| Men                                                       | 1829 (50.4) [48.4, 52.5] | 2106 (50.0) [48.6, 51.3] | 1932 (49.5) [47.5, 51.6] | 1574 (49.7) [48.0, 51.5] |
| Women                                                     | 1730 (49.6) [47.5, 51.7] | 1941 (50.0) [48.7, 51.4] | 1839 (50.5) [48.4, 52.6] | 1497 (50.3) [48.5, 52.0] |
| <b>Age group, mean (SD) [95% CI]</b>                      |                          |                          |                          |                          |
| 18 – 39 yrs                                               | 1493 (47.3) [44.7, 49.9] | 1704 (44.0) [39.9, 48.1] | 1592 (42.4) [38.5, 46.3] | 1540 (44.9) [41.9, 47.8] |
| 40 – 59 yrs                                               | 964 (33.2) [31.1, 35.4]  | 1217 (38.2) [34.8, 41.7] | 1015 (38.0) [34.7, 41.3] | 1067 (43.8) [41.6, 46.4] |
| 60– 79 yrs                                                | 913 (17.1) [14.7, 19.4]  | 887 (15.2) [13.8, 16.7]  | 915 (16.7) [15.1, 18.3]  | 464 (11.3) [9.3, 13.3]   |
| ≥ 80 yrs                                                  | 189 (2.4) [1.9, 2.8]     | 239 (2.6) [2.1, 2.0]     | 249 (2.9) [2.2, 3.5]     | --                       |
| <b>Race</b>                                               |                          |                          |                          |                          |
| Non-Hispanic white                                        | 1513 (71.7) [65.5, 77.9] | 2014 (72.4) [67.5, 77.4] | 1915 (73.2) [65.9, 80.5] | 1321 (71.1) [65.1, 77.1] |
| Non-Hispanic black                                        | 642 (9.5) [6.25, 12.8]   | 785 (10.1) [6.9, 13.2]   | 796 (10.5) [6.6, 14.3]   | 128 (5.1) [3.4, 6.9]     |
| Mexican American                                          | 1082 (6.6) [3.6, 9.5]    | 960 (7.7) [5.7, 9.7]     | 799 (7.7) [3.7, 11.7]    | 746 (8.90) [6.3, 11.5]   |
| Others                                                    | 322 (12.2) [5.8, 18.6]   | 288 (9.8) [5.8, 13.9]    | 261 (8.7) [6.3, 11.0]    | 876 (14.8) [10.9, 18.8]  |
| <b>Education level</b>                                    |                          |                          |                          |                          |
| < High school graduate                                    | 1408 (23.6) [20.4, 26.7] | 1300 (19.2) [17.0, 21.4] | 1114 (17.8) [15.0, 20.5] | 662 (15.5) [11.9, 19.2]  |
| High school graduate/GED                                  | 840 (26.4) [22.4, 30.4]  | 980 (25.5) [23.3, 27.7]  | 978 (26.9) [24.7, 29.1]  | 618 (24.5) [22.1, 26.9]  |
| ≥ College                                                 | 1302 (50.0) [45.8, 54.2] | 1763 (55.3) [51.9, 58.7] | 1675 (55.3) [52.0, 58.7] | 1363 (60.0) [55.2, 64.9] |
| <b>Annual household income</b>                            |                          |                          |                          |                          |
| < \$25000                                                 | 1452 (36.7) [29.6, 43.8] | 1479 (29.7) [27.1, 32.3] | 1518 (30.6) [26.7, 34.3] | 920 (20.9) [17.6, 24.2]  |
| \$25000 – \$55000                                         | 902 (30.8) [26.8, 34.8]  | 1163 (30.9) [27.5, 34.3] | 1081 (32.0) [27.5, 36.5] | 934 (30.6) [27.2, 34.1]  |
| > \$55000                                                 | 731 (32.5) [26.7, 38.2]  | 1133 (39.4) [35.6, 43.1] | 958 (37.4) [32.2, 42.7]  | 1097 (48.5) [43.6, 53.5] |
| <b>Time spent watching TV per day, mean (SD) [95% CI]</b> |                          |                          |                          |                          |
| < 2 h                                                     | 621 (19.5) [17.7, 21.6]  | 606 (19.8) [17.9, 21.6]  | 634 (22.0) [19.3, 24.8]  | 545 (22.5) [20.8, 24.2]  |
| 2-4 h                                                     | 2072 (68.3) [66.7, 69.9] | 2215 (63.2) [61.4, 65.2] | 2040 (64.7) [61.5, 67.9] | 1674 (66.8) [65.0, 68.5] |
| > 4 h                                                     | 428 (12.2) [10.7, 13.8]  | 674 (17.0) [15.6, 18.4]  | 542 (13.3) [10.7, 15.9]  | 354 (10.7) [8.49, 13.0]  |
| <b>Physical activity level</b>                            |                          |                          |                          |                          |
| Moderate or below                                         | 888 (44.0) [40.1, 47.8]  | 1236 (51.0) [47.0, 55.0] | 1451 (61.5) [58.4, 64.6] | 1066 (54.0) [51.0, 57.0] |
| Vigorous                                                  | 1013 (56.0) [52.2, 59.9] | 1253 (49.0) [45.0, 53.0] | 963 (38.5) [35.5, 41.6]  | 1027 (46.0) [43.1, 49.0] |
| <b>Body mass index</b>                                    |                          |                          |                          |                          |
| Normal or below (< 25 kg/m <sup>2</sup> )                 | 1351 (40.1) [36.3, 43.9] | 1617 (39.6) [38.0, 41.2] | 1389 (36.6) [34.6, 38.6] | 1089 (36.6) [33.1, 40.2] |

|    |                                                        |                          |                          |                          |                          |
|----|--------------------------------------------------------|--------------------------|--------------------------|--------------------------|--------------------------|
| 1  |                                                        |                          |                          |                          |                          |
| 2  |                                                        |                          |                          |                          |                          |
| 3  |                                                        |                          |                          |                          |                          |
| 4  | <b>Overweight (25.0-29.9 kg/m<sup>2</sup>)</b>         | 1289 (35.5) [32.7, 38.3] | 1494 (36.7) [34.2, 39.3] | 1348 (35.8) [32.9, 38.6] | 1054 (34.1) [32.4, 35.9] |
| 5  | <b>Obesity (<math>\geq 30</math> kg/m<sup>2</sup>)</b> | 914 (24.4) [21.3, 27.5]  | 936 (23.7) [21.3, 26.0]  | 1034 (27.6) [24.7, 30.5] | 928 (29.3) [25.8, 32.7]  |
| 6  | 175 --: Not available.                                 |                          |                          |                          |                          |
| 7  |                                                        |                          |                          |                          |                          |
| 8  |                                                        |                          |                          |                          |                          |
| 9  |                                                        |                          |                          |                          |                          |
| 10 |                                                        |                          |                          |                          |                          |
| 11 |                                                        |                          |                          |                          |                          |
| 12 |                                                        |                          |                          |                          |                          |
| 13 |                                                        |                          |                          |                          |                          |
| 14 |                                                        |                          |                          |                          |                          |
| 15 |                                                        |                          |                          |                          |                          |
| 16 |                                                        |                          |                          |                          |                          |
| 17 |                                                        |                          |                          |                          |                          |
| 18 |                                                        |                          |                          |                          |                          |
| 19 |                                                        |                          |                          |                          |                          |
| 20 |                                                        |                          |                          |                          |                          |
| 21 |                                                        |                          |                          |                          |                          |
| 22 |                                                        |                          |                          |                          |                          |
| 23 |                                                        |                          |                          |                          |                          |
| 24 |                                                        |                          |                          |                          |                          |
| 25 |                                                        |                          |                          |                          |                          |
| 26 |                                                        |                          |                          |                          |                          |
| 27 |                                                        |                          |                          |                          |                          |
| 28 |                                                        |                          |                          |                          |                          |
| 29 |                                                        |                          |                          |                          |                          |
| 30 |                                                        |                          |                          |                          |                          |
| 31 |                                                        |                          |                          |                          |                          |
| 32 |                                                        |                          |                          |                          |                          |
| 33 |                                                        |                          |                          |                          |                          |
| 34 |                                                        |                          |                          |                          |                          |
| 35 |                                                        |                          |                          |                          |                          |
| 36 |                                                        |                          |                          |                          |                          |
| 37 |                                                        |                          |                          |                          |                          |
| 38 |                                                        |                          |                          |                          |                          |
| 39 |                                                        |                          |                          |                          |                          |
| 40 |                                                        |                          |                          |                          |                          |
| 41 |                                                        |                          |                          |                          |                          |
| 42 |                                                        |                          |                          |                          |                          |
| 43 |                                                        |                          |                          |                          |                          |
| 44 |                                                        |                          |                          |                          |                          |
| 45 |                                                        |                          |                          |                          |                          |
| 46 |                                                        |                          |                          |                          |                          |

For peer review only

## 176 **Prevalence and temporal trends of pre-sarcopenia from 1999 to 2006**

177 The overall age- and sex-adjusted prevalence of pre-sarcopenia ranged from 16.4% (95%  
178 CI: 15.3%, 17.6%) in 1999-2000 to 14.8% (95% CI: 13.0%, 16.8%) in 2005-2006 (*P* for  
179 trend = 0.78) (**Table 2**).

180 The age-adjusted prevalence of pre-sarcopenia in men was 22.7% (95% CI: 20.3%, 25.2%)  
181 in 1999-2000 and 12.3% (95% CI: 10.6%, 14.3%) in 2005-2006 (*P* for trend = 0.36), while in  
182 women, the prevalence was 20.0% in 1999-2000 and 17.7% in 2005-2006 (*P* for trend = 0.20).  
183 The prevalence of pre-sarcopenia in women was significantly higher than that in men in 2005-  
184 2006 (17.7% for women vs. 12.3% for men; *P* < 0.001). There were also racial differences in  
185 pre-sarcopenia prevalence as well as temporal trends. The prevalence significantly increased  
186 from 6.2% in 1999-2000 to 20.6% in 2005-2006 among non-Hispanic blacks (*P* for trend <  
187 0.001) but remained stable among non-Hispanic whites (*P* for trend = 0.84) and Mexican  
188 Americans (*P* for trend = 0.54) from 1999 to 2006. Compared to those in the other age groups,  
189 participants aged  $\geq 80$  years and 60 – 79 years had a significantly higher prevalence of pre-  
190 sarcopenia in the four survey cycles from 1999-2006. In three of the survey cycles (1999-2000,  
191 2001-2002, and 2003-2004), compared to those who reported moderate/low physical activity  
192 levels, participants who reported vigorous physical activity levels were more likely to have a  
193 lower prevalence of pre-sarcopenia (*P* values < 0.01). In addition, participants with higher  
194 annual household incomes had a lower prevalence of pre-sarcopenia in the 2001-2002 and  
195 2003-2004 survey cycles. In all four survey cycles, participants with BMI < 25 kg/m<sup>2</sup> had a  
196 relatively higher prevalence of pre-sarcopenia than overweight and obese participants.



197

**Table 2. Prevalence (95% CIs) and temporal trends of pre-sarcopenia in the NHANES surveys from 1999 to 2006**

| Characteristics                       | 1999-2000 (n=3550) | 2001-2002 (n=3987) | 2003-2004 (n=3745) | 2005-2006 (n=3062) | P-value for trend # |
|---------------------------------------|--------------------|--------------------|--------------------|--------------------|---------------------|
| <b>Overall</b>                        | 16.4 (15.3, 17.6)  | 16.4 (14.0, 19.1)  | 17.9 (16.2, 19.7)  | 14.8 (13.0, 16.8)  | 0.78                |
| <b>Sex</b>                            |                    |                    |                    |                    |                     |
| <b>Men</b>                            | 22.7 (20.3, 25.2)  | 19.7 (15.9, 24.2)  | 21.2 (18.8, 23.7)  | 12.3 (10.6, 14.3)  | 0.36                |
| <b>Women</b>                          | 20.0 (17.9, 22.3)  | 21.4 (17.7, 25.5)  | 23.0 (19.8, 26.6)  | 17.7 (14.9, 20.9)  | 0.20                |
| <b>P for sex</b>                      | 0.45               | 0.23               | 0.23               | < 0.001            |                     |
| <b>Age group</b>                      |                    |                    |                    |                    |                     |
| <b>18 – 39 yrs</b>                    | 11.3 (9.1, 14.0)   | 13.5 (10.6, 17.0)  | 14.9 (12.8, 17.3)  | 14.1 (11.8, 16.8)  | 0.04                |
| <b>40 – 59 yrs</b>                    | 15.1 (12.9, 17.5)  | 12.1 (9.9, 14.7)   | 14.2 (11.6, 17.2)  | 12.9 (11.0, 15.2)  | 0.25                |
| <b>60 – 79 yrs</b>                    | 22.3 (19.0, 26.1)  | 23.7 (18.7, 29.6)  | 23.6 (20.3, 27.2)  | 17.7 (14.4, 21.5)  | 0.38                |
| <b>≥ 80 yrs</b>                       | 45.1 (38.7, 51.6)  | 40.1 (31.8, 49.0)  | 42.0 (36.2, 48.0)  | --                 | 0.64                |
| <b>P for age group</b>                | < 0.001            | < 0.001            | < 0.001            | 0.05               |                     |
| <b>Race</b>                           |                    |                    |                    |                    |                     |
| <b>Non-Hispanic white</b>             | 22.8 (21.3, 24.5)  | 20.5 (17.5, 23.9)  | 22.9 (20.3, 25.6)  | 15.9 (13.8, 18.3)  | 0.84                |
| <b>Non-Hispanic black</b>             | 6.2 (4.2, 8.9)     | 10.8 (7.2, 15.8)   | 8.6 (5.8, 12.5)    | 20.6 (13.0, 31.1)  | < 0.001             |
| <b>Mexican American</b>               | 20.5 (17.3, 24.3)  | 20.9 (16.4, 26.2)  | 20.9 (17.1, 25.3)  | 14.9 (11.7, 18.8)  | 0.54                |
| <b>Others</b>                         | 22.3 (15.1, 31.6)  | 31.0 (23.1, 40.2)  | 32.7 (26.6, 38.0)  | 6.9 (5.0, 9.6)     | 0.13                |
| <b>P for Race</b>                     | < 0.001            | < 0.001            | < 0.001            | < 0.001            |                     |
| <b>Education level,</b>               |                    |                    |                    |                    |                     |
| <b>&lt; High school graduate</b>      | 20.7 (17.5, 24.4)  | 21.1 (14.9, 28.9)  | 22.7 (19.1, 26.7)  | 16.6 (13.3, 20.5)  | 0.34                |
| <b>High school graduate or GED</b>    | 21.3 (18.2, 24.7)  | 22.0 (17.6, 27.1)  | 21.2 (19.0, 23.5)  | 14.0 (11.6, 16.8)  | 0.47                |
| <b>≥ College</b>                      | 21.6 (19.2, 24.4)  | 19.4 (16.5, 22.7)  | 22.3 (18.9, 26.1)  | 14.4 (12.3, 16.8)  | 0.59                |
| <b>P for education</b>                | 0.88               | 0.22               | 0.57               | 0.50               |                     |
| <b>Annual household income</b>        |                    |                    |                    |                    |                     |
| <b>&lt; \$25000</b>                   | 23.0 (20.0, 26.3)  | 24.5 (18.5, 31.7)  | 26.2 (23.5, 29.2)  | 15.3 (12.5, 18.6)  | 0.51                |
| <b>\$25000 – \$55000</b>              | 19.7 (16.7, 23.2)  | 20.9 (17.0, 25.4)  | 22.1 (18.2, 26.5)  | 14.3 (11.6, 17.4)  | 0.77                |
| <b>&gt; \$55000</b>                   | 18.5 (15.1, 22.6)  | 15.4 (11.4, 20.4)  | 16.9 (13.1, 21.5)  | 14.9 (12.5, 17.7)  | 0.94                |
| <b>P for income</b>                   | 0.17               | 0.005              | < 0.001            | 0.80               |                     |
| <b>Time spent watching TV per day</b> |                    |                    |                    |                    |                     |
| <b>&lt; 2 h</b>                       | 23.0 (17.6, 29.5)  | 21.1 (18.4, 24.2)  | 19.7 (14.8, 25.7)  | 14.3 (11.2, 18.1)  | 0.48                |
| <b>2-4 h</b>                          | 20.4 (18.8, 22.2)  | 21.5 (17.9, 25.7)  | 23.3 (21.1, 25.6)  | 14.5 (12.0, 17.3)  | 0.76                |
| <b>&gt; 4 h</b>                       | 24.8 (19.2, 31.4)  | 20.5 (16.3, 25.6)  | 23.5 (18.9, 28.9)  | 13.6 (10.8, 16.9)  | 0.17                |
| <b>P for time spent watching TV</b>   | 0.42               | 0.68               | 0.08               | 0.95               |                     |
| <b>Physical activity level</b>        |                    |                    |                    |                    |                     |

1  
2  
3  
4  
5  
6  
7  
8  
9  
10  
11  
12  
13  
14  
15  
16  
17  
18  
19  
20  
21  
22  
23  
24  
25  
26  
27  
28  
29  
30  
31  
32  
33  
34  
35  
36  
37  
38  
39  
40  
41  
42  
43  
44  
45  
46

|                                                   |                   |                   |                   |                   |      |
|---------------------------------------------------|-------------------|-------------------|-------------------|-------------------|------|
| <b>Moderate or below</b>                          | 20.3 (17.5, 23.5) | 23.4 (19.2, 28.1) | 22.2 (18.7, 26.1) | 14.7 (11.7, 18.3) | 0.35 |
| <b>Vigorous</b>                                   | 15.2 (12.1, 18.8) | 15.3 (11.9, 19.3) | 16.4 (13.1, 20.4) | 12.7 (9.8, 16.3)  | 0.15 |
| <b>P for physical activity level</b>              | 0.001             | < 0.001           | 0.002             | 0.38              |      |
| <b>Body mass index</b>                            |                   |                   |                   |                   |      |
| <b>Normal or below (&lt; 25 kg/m<sup>2</sup>)</b> | 50.7 (45.3, 56.1) | 49.7 (42.1, 57.3) | 56.4 (50.4, 62.3) | 41.4 (36.0, 46.9) | 0.42 |
| <b>Overweight (25.0-29.9 kg/m<sup>2</sup>)</b>    | 5.4 (3.8, 7.8)    | 5.9 (4.1, 8.5)    | 7.2 (5.9, 8.8)    | 4.8 (3.4, 6.7)    | 0.08 |
| <b>Obesity (≥ 30 kg/m<sup>2</sup>)</b>            | 0.4 (0.2, 1.0)    | 0.3 (0.1, 1.2)    | 0.2 (0.1, 0.9)    | --                | 0.30 |
| <b>P for body mass index</b>                      | <0.001            | <0.001            | <0.001            | <0.001            |      |

198 --: Not available.

199 Pre-sarcopenia was defined according to dual energy X-ray absorptiometry (DXA) criteria: GED, general equivalency diploma.

200 #: P-value for trend (1999-2006) was calculated by using logistic regression models adjusted for sex, age, race, education level, annual household income,

201 time spent watching TV per day, and physical activity level.

202 P-values for the differences between groups in each survey cycle were obtained by the chi-squared test.

## 203 **Body Composition Measurements**

204 The average body weight across all participants significantly increased from 76.8 kg (95%  
205 CI: 75.6, 77.9) in 1999-2000 to 78.9 kg (95% CI: 77.4, 80.4) in 2005-2006 ( $P$  for trend =0.010),  
206 with an average increase of 2.11 kg (95% CI: 0.28, 3.93 kg) (**Table 3**). Correspondingly, the  
207 prevalence of obesity significantly increased from 24.3% (95% CI: 21.2%, 27.4%) to 29.3%  
208 (95% CI: 25.8%, 32.7%) in the overall population ( $P$  for trend = 0.023) and from 20.8% (95%  
209 CI: 17.9%, 23.7%) to 27.6% (95% CI: 23.0%, 32.1%) in men ( $P$  for trend=0.007) but remained  
210 stable in women (from 28.0% to 30.9%,  $P$  for trend=0.229) over time (**Table 3 and Figure**  
211 **1A**). After stratification by age (**Figure 1B**), the prevalence of obesity significantly increased  
212 from 25.6% to 33.8% in the 40-59 age group ( $P$  for trend=0.027) but remained stable in the  
213 other three age groups. Similar increasing trends of obesity prevalence were observed in non-  
214 Hispanic whites (from 23.8% to 28.6%,  $P$  for trend =0.025) but were statistically stable in non-  
215 Hispanic blacks and Mexican Americans (**Figure 1C**). From 1999 to 2006, the TASM  
216 significantly decreased in the non-Hispanic black group but significantly increased in the  
217 Mexican American and other ethnic groups (**Table 3 and Figure 2A**). Meanwhile, we observed  
218 a slight increase in waist circumference (**Table 3 and Figure 2B**), total lean body mass (**Table**  
219 **3**), prevalence of central obesity (**Table 3**), and BMD (**Table 3 and Figure 2C**), however, we  
220 did not detect any significant trends for TPF (**Figure 2D**).

225 **Table 3. Trends in body weight, obesity and other body composition measurements from 1999 to 2006 in the NHANES surveys**

| Characteristics              | Survey cycles     |                   |                   |                   | <i>P</i> -value for trend # | Mean change from 1999-2000 to 2005-2006 (95% CI) |
|------------------------------|-------------------|-------------------|-------------------|-------------------|-----------------------------|--------------------------------------------------|
|                              | 1999-2000         | 2001-2002         | 2003-2004         | 2005-2006         |                             |                                                  |
| Weight, kg                   | 76.8 (75.6, 77.9) | 76.9 (76.1, 77.7) | 78.3 (77.5, 79.0) | 78.9 (77.4, 80.4) | 0.010                       | 2.11 (0.28, 3.93)                                |
| BMI, kg/m <sup>2</sup>       | 26.9 (26.5, 27.3) | 26.8 (26.6, 27.1) | 27.3 (27.0, 27.5) | 27.5 (27.0, 28.0) | 0.016                       | 0.59 (-0.01, 1.20)                               |
| Overweight, % †              | 35.5 (32.6, 38.2) | 36.7 (34.2, 39.3) | 35.8 (32.9, 38.6) | 34.1 (32.4, 35.9) | 0.25                        | -1.31 (-4.45, 1.83)                              |
| Obesity, % †                 | 24.3 (21.2, 27.4) | 23.7 (21.3, 26.0) | 27.6 (24.7, 30.5) | 29.3 (25.8, 32.7) | 0.023                       | 4.92 (0.49, 9.36)                                |
| Waist Circumference, cm      | 92.6 (91.3, 93.9) | 93.0 (92.4, 93.7) | 94.9 (94.3, 95.5) | 94.5 (93.1, 95.9) | <0.001                      | 1.90 (0.12, 3.67)                                |
| Central obesity, % †         | 39.9 (35.3, 44.5) | 41.5 (39.3, 43.8) | 47.3 (44.5, 50.2) | 45.1 (41.2, 49.1) | 0.005                       | 5.21 (-0.60, 11.0)                               |
| Total body fat percentage, % | 33.0 (32.4, 33.7) | 32.6 (32.3, 32.9) | 33.5 (33.1, 34.0) | 32.8 (32.3, 33.3) | 0.766                       | -0.24 (-1.04, 0.56)                              |
| Total lean body mass, kg     | 49.3 (48.7, 49.8) | 49.6 (49.1, 50.0) | 49.8 (49.3, 50.3) | 50.7 (50.0, 51.5) | <0.001                      | 1.45 (0.57, 2.34)                                |
| ASM, kg *                    | 21.7 (21.5, 22.0) | 21.7 (21.4, 22.0) | 21.7 (21.4, 21.9) | 21.9 (21.6, 22.2) | 0.986                       | 0.16 (-0.24, 0.56)                               |
| SMI, kg/m <sup>2</sup>       | 7.53 (7.45, 7.61) | 7.50 (7.41, 7.59) | 7.46 (7.38, 7.54) | 7.55 (7.46, 7.64) | 0.958                       | 0.02 (-0.09, 0.14)                               |
| BMD, g/cm <sup>2</sup>       | 1.12 (1.11, 1.12) | 1.14 (1.13, 1.14) | 1.15 (1.14, 1.16) | 1.17 (1.16, 1.19) | < 0.001                     | 0.06 (0.04, 0.07)                                |

226 ASM: Appendicular skeletal muscle mass, TASM: Total appendicular skeletal muscle index, BMD: Bone mineral density;

227 #: *P*-value for trend (1999-2006) was adjusted for sex, age, race, education level, annual household income, time spent watching TV per day, and  
 228 physical activity level.

229 All statistics were weighted and shown as the means (95% confidence interval) or † percentages (95% confidence intervals).

230

231

1  
2  
3 232 **DISCUSSION**  
4

5 233 In this large-scale study that analysed nationally representative data from U.S.  
6  
7 234 respondents to the NHANES, we found that the overall prevalence of pre-sarcopenia  
8  
9 235 remained stable, while there was a substantial increase in the prevalence for the non-Hispanic  
10  
11 236 black and young age groups from 1999 to 2006. Hence, our hypothesis regarding an  
12  
13 237 increasing trend in the pre-sarcopenia prevalence over time was not fully supported by the  
14  
15 238 findings. Our results indicate that certain subpopulations might be more vulnerable to pre-  
16  
17 239 sarcopenia than the overall population. Indeed, we found that individuals who were older or  
18  
19 240 under/normal weight had a considerably higher prevalence of pre-sarcopenia.  
20  
21  
22  
23

24 241 Our study found an increasing trend in the prevalence of obesity and central obesity  
25  
26 242 from 1999 to 2006 among the overall population. Previous studies reported that obesity can  
27  
28 243 lead to loss of muscle mass and strength [33] and is commonly accompanied by a reduction  
29  
30 244 in physical activity and deterioration of metabolic disorders, which in turn accelerates the  
31  
32 245 abnormal distribution of fat mass and initiates the process of sarcopenia. [34] In contrast, it is  
33  
34 246 interesting that the prevalence of pre-sarcopenia was considerably higher in under/normal  
35  
36 247 weight adults than in obese adults in our study. The contradictory findings might be  
37  
38 248 explained by the fact that our study only measured skeletal muscle mass, but the muscle mass  
39  
40 249 of under/normal weight individuals might be relatively lower than that of overweight/obese  
41  
42 250 individuals. In addition, our study focused on pre-sarcopenia rather than sarcopenia, which is  
43  
44 251 defined as the presence of both low muscle mass and low muscle function (strength or  
45  
46 252 physical performance).  
47  
48  
49  
50

51 253 A previous study reported that skeletal muscle mass begins to decrease at approximately  
52  
53 254 30 – 39 years old. [35] Accordingly, we found a relatively higher prevalence of pre-  
54  
55 255 sarcopenia in the older age groups than in the 18-39 age group. However, it is still unclear  
56  
57 256 whether muscle mass reduction would further accelerate muscle strength loss and ageing-  
58  
59  
60

1  
2  
3 257 related health issues. Observational studies have reported a linearly positive association  
4  
5 258 between muscle mass and strength in both middle-aged and elderly people. [36-38] This  
6  
7 259 indicates that the amount of muscle mass acquired during youth may protect adults from the  
8  
9 260 early onset of sarcopenia. Therefore, it may be beneficial to pay more attention to increasing  
10  
11 261 muscle mass in both young and old populations. The peak period of muscle strength lags  
12  
13 262 nearly 10 years behind the peak period of muscle mass and starts to decline at approximately  
14  
15 263 50 years of age. [39] The speed of muscle strength decline is 2 to 5 times faster than that of  
16  
17 264 muscle mass over the same period.[40]  
18  
19  
20

21 265 We found that the prevalence of pre-sarcopenia was stable in both genders from 1999 to  
22  
23 266 2006. It was also found that women had a higher prevalence of pre-sarcopenia than men in  
24  
25 267 2005-2006. This might be caused by a more rapid decrease in the prevalence of pre-  
26  
27 268 sarcopenia among men than women. Previous evidence, however, is inconsistent. For  
28  
29 269 instance, the study of Michele *et al.* found a higher prevalence of sarcopenia in men than in  
30  
31 270 women who were aged 64 to 93 years, [41] while the findings in the Fifth Korea National  
32  
33 271 Health and Nutrition Examination Survey showed that sarcopenia was more prevalent in  
34  
35 272 women. [42] Women have less absolute and relative muscle mass than men. [43] In addition,  
36  
37 273 given the natural differences in skeletal muscle between men and women, such as the amount  
38  
39 274 of muscle mass, muscle capillary density, and muscle fibre type, [44] physical activity might  
40  
41 275 be a potential cause for sex differences in the prevalence of sarcopenia. [45] In our study,  
42  
43 276 most women had lower self-reported levels of physical activity than men. Vigorous physical  
44  
45 277 activity in men gradually increased, whereas it decreased in women over time. Another  
46  
47 278 critical factor is age-related changes in gonadal function and sex hormones regulating muscle  
48  
49 279 mass distribution. Evidence suggests that lower serum testosterone levels in elderly men  
50  
51 280 contribute to muscle weakness. [46] Men experience a gradual decrease in knee extensor and  
52  
53 281 handgrip strength between 20 and 80 years of age, whereas women experience a steep decline  
54  
55  
56  
57  
58  
59  
60

1  
2  
3 282 after the age of 55 (menopausal age). [47 48] Although it is not clear whether age-related  
4  
5 283 changes in gonadal function directly regulate physical activity in humans, gonadectomy has  
6  
7  
8 284 been shown to cause a dramatic decline in spontaneous physical activity in animals. [49]  
9  
10 285 Thus, sex differences might be pivotal in understanding the process of sarcopenia and ageing,  
11  
12 286 and understanding why each sex remains “muscle healthy” throughout their lifespan could  
13  
14  
15 287 open new avenues to prevent sarcopenia and the ageing process.

16  
17 288 We also detected a considerably increased trend of pre-sarcopenia prevalence in non-  
18  
19 289 Hispanic black people, while the prevalence was stable in non-Hispanic whites and Mexican  
20  
21  
22 290 Americans over time. Racial differences in muscle mass have been reported in previous  
23  
24 291 studies. Evidence has shown that African Americans have a significantly higher skeletal  
25  
26 292 muscle/adipose tissue-free body mass ratio than other races, although the difference was very  
27  
28 293 small. [50] Mahbubur and Abbey reported that black women had greater levels of total and  
29  
30 294 regional lean mass than white and Hispanic women and that Hispanic women had even lower  
31  
32  
33 295 values than white women in an assessment of the body composition of 708 healthy black,  
34  
35 296 white, and Hispanic women aged 16–33 years using DXA analysis. [51] According to the  
36  
37 297 NHANES III bioelectrical impedance data, the amount of fat-free mass in Mexican  
38  
39 298 Americans was lower than that in non-Hispanic Blacks, which was in turn lower than that in  
40  
41  
42 299 non-Hispanic Whites. [52] The underlying mechanism of these racial differences is still  
43  
44  
45 300 unclear and warrants further investigation.

46  
47 301 This is a representative population-based study. This is the first study that focused on pre-  
48  
49 302 sarcopenia among adults. However, there are several limitations in this study. First, we only  
50  
51 303 assessed muscle mass data rather than muscle strength, which does not reflect muscle power  
52  
53  
54 304 and may be confounded by a third variable that was not involved in this study. Second, the  
55  
56 305 prevalence of pre-sarcopenia in women may be underestimated because we used a height-  
57  
58 306 adjusted definition of the condition, [53] which is potentially problematic in identifying  
59  
60

1  
2  
3 307 participants with sarcopenic obesity. [54] However, if we had used the weight-adjusted  
4  
5 308 definition, people classified as having pre-sarcopenia would have had higher BMI values  
6  
7  
8 309 compared with those without sarcopenia. [55] Third, as physical activity data were self-  
9  
10 310 reported, reporting bias may exist. Recent research on self-reported levels of physical activity  
11  
12 311 indicated that individuals in the U.S. tended to have differing perceptions of activity levels  
13  
14 312 and that compared to Europeans, U.S. individuals overestimate their time spent exercising.  
15  
16  
17 313 [56] Future studies should apply objective measures to determine muscle strength and  
18  
19 314 physical activity to accurately evaluate sarcopenia prevalence.  
20  
21  
22 315

## 23 316 **CONCLUSIONS**

26 317 The overall prevalence of pre-sarcopenia was stable in both men and women from 1999-  
27  
28 318 2006 among U.S. adults, while there is a slight increase in the prevalence of pre-sarcopenia  
29  
30 319 from 1999 to 2006 among U.S. young adults. Adults who were non-Hispanic blacks, elderly  
31  
32 320 or under/normal weight are at high-risk of pre-sarcopenia. Meanwhile, we found a significant  
33  
34  
35 321 increased trend of obesity, central obesity. It suggests that the high prevalence of pre-  
36  
37 322 sarcopenia and obesity is an important public health concern. It might be helpful to maintain  
38  
39  
40 323 resistant and at least moderate physical activity for the prevention of sarcopenia and obesity  
41  
42 324 in U.S. adults.  
43  
44  
45 325  
46  
47 326  
48  
49 327  
50  
51 328  
52  
53  
54 329  
55  
56 330  
57  
58 331  
59  
60



1  
2  
3 332 **Acknowledgements**  
4

5 333 We would like to thank Mr. Christopher Lavender for the discussion on the manuscript. We  
6  
7  
8 334 also appreciate the help of Yang Deng for assistance with data collection.  
9

10  
11 335 **Contributors**  
12

13 336 JBL, XZ and HJL designed and conducted the research; JBL, XZ and HJL analysed the data;  
14  
15 337 JBL, XZ, HJL, YWW and DTG were responsible for the final content of the manuscript; all  
16  
17 338 authors took part in writing the manuscript and read and approved the final version.  
18  
19

20  
21 339 **Funding**  
22

23  
24 340 This work was supported by NSFC (Natural Science Foundation of China, No.: 81703238)  
25  
26 341 (Dr. Xi Zhang, Yu-Wan Wu and Dan-Tong Gu).  
27  
28

29 342 **Competing interests**  
30

31  
32 343 None declared.  
33

34 344 **Patient consent for publication**  
35

36 345 Not required.  
37

38 346 **Provenance and peer review**  
39

40  
41 347 Not commissioned; externally peer reviewed.  
42

43 348 **Ethics approval**  
44

45  
46 349 All NHANES protocols were approved by the National Centre for Health Statistics Research  
47  
48 350 ethics review board.  
49

50  
51 351 **Data availability statement**  
52

53  
54 352 The data link is <https://www.cdc.gov/nchs/nhanes/index.htm>.  
55

56 353  
57  
58  
59  
60

## 354 REFERENCES

- 355 1. Cruz-Jentoft AJ, Baeyens JP, Bauer JM, et al. Sarcopenia: European consensus on  
356 definition and diagnosis: Report of the European Working Group on Sarcopenia in  
357 Older People. *Age Ageing*. 2010;39:412-423.
- 358 2. Trajanoska K, Schoufour JD, Darweesh SK, et al. Sarcopenia and Its Clinical Correlates in  
359 the General Population: The Rotterdam Study. *J Bone Mine Res*. 2018;33(7):1209-  
360 1218.
- 361 3. Santilli V, Bernetti A, Mangone M, Paoloni M. Clinical definition of sarcopenia. *Clin*  
362 *Cases Miner Bone Metab*. 2014;11(3):177-180
- 363 4. Provan M, Mander T. Mobility, exercise, nutrition and healthy ageing to avoid sarcopenia.  
364 *Post Reprod Health*. 2018;24(2):98-102.
- 365 5. Lynch GS, Koopman R. Dietary meat and protection against sarcopenia. *Meat Sci*.  
366 2018;144:180–185.
- 367 6. Lee SG, Lee YH, Kim KJ, Lee W, Kwon OH, Kim JH. Additive association of vitamin D  
368 insufficiency and sarcopenia with low femoral bone mineral density in  
369 noninstitutionalized elderly population: the Korea National Health and Nutrition  
370 Examination Surveys 2009-2010. *Osteoporos Int*. 2013;24(11):2789-2799.
- 371 7. Wakabayashi H, Sakuma K. Comprehensive approach to sarcopenia treatment. *Curr Clin*  
372 *Pharmacol*. 2014;9(2):171-180
- 373 8. Fry CS, Lee JD, Mula J, et al. Inducible depletion of satellite cells in adult, sedentary mice  
374 impairs muscle regenerative capacity without affecting sarcopenia. *Nat Med*.  
375 2015;21(1):76-80.
- 376 9. Campos F, Abrigo J, Aguirre F, et al. Sarcopenia in a mice model of chronic liver disease:  
377 role of the ubiquitin-proteasome system and oxidative stress. *Pflugers Archiv*  
378 2018;470(10):1503–1519.
- 379 10. Roubenoff R. Sarcopenic obesity: does muscle loss cause fat gain? Lessons from  
380 rheumatoid arthritis and osteoarthritis. *Ann N Y Acad Sci*. 2000;904:553-557
- 381 11. Chen YC, Tu YK, Huang KC, Chen PC, Chu DC, Lee YL. Pathway from central obesity  
382 to childhood asthma. Physical fitness and sedentary time are leading factors. *Am J*  
383 *Respir Crit Care Med*. 2014;189(10):1194-1203.
- 384 12. Calvani R, Marini F, Cesari M, et al. Biomarkers for physical frailty and sarcopenia: state  
385 of the science and future developments. *J Cachexia Sarcopenia Muscle*.  
386 2015;6(4):278-286.
- 387 13. Kim SE. Clinical Implication of Sarcopenia in Patients with Inflammatory Bowel  
388 Disease. *Korean J Gastroenterol*. 2018;71(6):308-314.
- 389 14. Ryan E, McNicholas D, Creavin B, Kelly ME, Walsh T, Beddy D. Sarcopenia and  
390 Inflammatory Bowel Disease: A Systematic Review. *Inflamm Bowel Dis*.  
391 2019;1;25(1):67-73.
- 392 15. Han E, Lee YH, Kim BK, et al. Sarcopenia is associated with the risk of significant liver  
393 fibrosis in metabolically unhealthy subjects with chronic hepatitis B. *Aliment*  
394 *Pharmacol Ther*. 2018;48(3):300-312.
- 395 16. Hanai T, Shiraki M, Nishimura K, et al. Sarcopenia impairs prognosis of patients with  
396 liver cirrhosis. *Nutrition*. 2015;31(1):193-199.
- 397 17. Moctezuma-Velazquez C, Low G, Mourtzakis M, et al. Association between Low  
398 Testosterone Levels and Sarcopenia in Cirrhosis: A Cross-sectional Study. *Ann*  
399 *Hepatol*. 2018;17(4):615-623.
- 400 18. Bhanji RA, Moctezuma-Velazquez C, Duarte-Rojo A, et al. Myosteatorsis and sarcopenia  
401 are associated with hepatic encephalopathy in patients with cirrhosis. *Hepatol Int*.  
402 2018;12(4):377-386.

- 1  
2  
3 403 19. Siegert E, March C, Otten L, et al. Prevalence of sarcopenia in systemic sclerosis:  
4 404 Assessing body composition and functional disability in patients with systemic  
5 405 sclerosis. *Nutrition*. 2018;55-56:51-55.
- 6 406 20. Miyamoto Y, Baba Y, Sakamoto Y, et al. Sarcopenia is a Negative Prognostic Factor  
7 407 After Curative Resection of Colorectal Cancer. *Ann Surg Oncol*. 2015;22(8):2663-  
8 408 2668.
- 9 409 21. Voron T, Tselikas L, Pietrasz D, et al. Sarcopenia Impacts on Short- and Long-term  
10 410 Results of Hepatectomy for Hepatocellular Carcinoma. *Ann Surg*. 2015;261(6):1173-  
11 411 1183.
- 12 412 22. Joglekar S, Asghar A, Mott SL, et al. Sarcopenia Is an Independent Predictor of  
13 413 Complications Following Pancreatectomy for Adenocarcinoma. *J Surg Oncol*.  
14 414 2015;111(6):771-775.
- 15 415 23. Jones SE, Maddocks M, Kon SSC, et al. Sarcopenia in COPD: prevalence, clinical  
16 416 correlates and response to pulmonary rehabilitation. *Thorax*. 2015;70(3):213-218.
- 17 417 24. Chin SO, Rhee SY, Chon S, et al. Sarcopenia is independently associated with  
18 418 cardiovascular disease in older Korean adults: the Korea National Health and  
19 419 Nutrition Examination Survey (KNHANES) from 2009. *PLoS One*.  
20 420 2013;8(3):e60119.
- 21 421 25. Atkins JL, Whincup PH, Morris RW, Lennon LT, Papacosta O, Wannamethee SG.  
22 422 Sarcopenic obesity and risk of cardiovascular disease and mortality: a population-  
23 423 based cohort study of older men. *J Am Geriatr Soc*. 2014;62(2):253-260.
- 24 424 26. Kim YK, Lee HS, Ryu JJ, In Lee H, Seo SG. Sarcopenia increases the risk for mortality  
25 425 in patients who undergo amputation for diabetic foot. *J Foot Ankle Res*. 2018;11:32.
- 26 426 27. Plan and operation of the Third National Health and Nutrition Examination Survey, 1988-  
27 427 94. Series 1: programs and collection procedures. *Vital Health stat 1*. 1994(32):1-407
- 28 428 28. Flegal KM, Carroll MD, Kit BK, Ogden CL. Prevalence of obesity and trends in the  
29 429 distribution of body mass index among US adults, 1999-2010. *JAMA*.  
30 430 2012;307(5):491-497.
- 31 431 29. Obesity: Preventing and managing the global epidemic: Report of a WHO consultation on  
32 432 obesity. *World Health Organ Tech Rep Ser*. 2000;894:i-253.
- 33 433 30. Cruz-Jentoft AJ, Baeyens JP, Bauer JM, et al. Sarcopenia: European consensus on  
34 434 definition and diagnosis: Report of the European Working Group on Sarcopenia in  
35 435 Older People. *Age Ageing*. 2010;39(4):412-423.
- 36 436 31. Menke A, Casagrande S, Geiss L, Cowie CC. Prevalence of and Trends in Diabetes  
37 437 Among Adults in the United States, 1988-2012. *JAMA*. 2015;314(10):1021-9.
- 38 438 32. Flegal KM, Carroll MD, Ogden CL, Curtin LR. Prevalence and trends in obesity among  
39 439 US adults, 1999-2008. *JAMA*. 2010;303(3):235-241.
- 40 440 33. Wannamethee SG, Atkins JL. Muscle loss and obesity: the health implications of  
41 441 sarcopenia and sarcopenic obesity. *Proc Nutr Soc*. 2015;74(4):405-412.
- 42 442 34. Cleasby ME, Jamieson PM, Atherton PJ. Insulin resistance and sarcopenia: mechanistic  
43 443 links between common co-morbidities. *J Endocrinol*. 2016;229(2):R67-R81.
- 44 444 35. Janssen I, Heymsfield SB, Wang ZM, Ross R. Skeletal muscle mass and distribution in  
45 445 468 men and women aged 18-88 yr. *J Appl Physiol*. 2000;89(1):81-88.
- 46 446 36. Newman AB, Haggerty CL, Goodpaster B, et al. Strength and muscle quality in a well-  
47 447 functioning cohort of older adults: the Health, Aging and Body Composition Study. *J*  
48 448 *Am Geriatr Soc*. 2003;51(3):323-330
- 49 449 37. Rolland Y, Czerwinski S, Abellan Van Kan G, et al. Sarcopenia: its assessment, etiology,  
50 450 pathogenesis, consequences and future perspectives. *J Nutr Health Aging*.  
51 451 2008;12(7):433-450
- 52  
53  
54  
55  
56  
57  
58  
59  
60

1  
2  
3  
4  
5  
6  
7  
8  
9  
10  
11  
12  
13  
14  
15  
16  
17  
18  
19  
20  
21  
22  
23  
24  
25  
26  
27  
28  
29  
30  
31  
32  
33  
34  
35  
36  
37  
38  
39  
40  
41  
42  
43  
44  
45  
46  
47  
48  
49  
50  
51  
52  
53  
54  
55  
56  
57  
58  
59  
60

38. Goodpaster BH, Park SW, Harris TB, et al. The loss of skeletal muscle strength, mass, and quality in older adults: the health, aging and body composition study. *J Gerontol A Biol Sci Med Sci*. 2006;61(10):1059-1064
39. Silva AM, Shen W, Heo M, et al. Ethnicity-Related Skeletal Muscle Differences Across the Lifespan. *Am J Hum Biol*. 2010;22(1):76-82.
40. Delmonico MJ, Harris TB, Visser M, et al. Longitudinal study of muscle strength, quality, and adipose tissue infiltration. *Am J Clin Nutr*. 2009;90(6):1579-1585.
41. Iannuzzi-Sucich M, Prestwood KM, Kenny AM. Prevalence of sarcopenia and predictors of skeletal muscle mass in healthy, older men and women. *J Gerontol A Biol Sci Med Sci*. 2002;57(12):M772-M777.
42. Hong N, Lee EY, Kim CO. Gamma-glutamyl transferase is associated with sarcopenia and sarcopenic obesity in community-dwelling older adults: results from the Fifth Korea National Health and Nutrition Examination Survey, 2010-2011. *Endocr J*. 2015;62(7):585-592.
43. Marcellino C, Henn RL, Olinto MT, Bressan AW, Paniz VM, Pattussi MP. Physical inactivity and associated factors among women from a municipality in southern Brazil. *J Phys Act Health*. 2014;11(4):777-783.
44. Kim J. Gender difference in association between appendicular skeletal muscle mass and cardiometabolic abnormalities in normal-weight and obese adults: Korea National Health and Nutrition Examination Survey (KNHANES) IV-3 and V-1. *Asia Pac J Public Health*. 2015;27(2):NP468-475.
45. Genton L, Karsegard VL, Chevalley T, Kossovsky MP, Darmon P, Pichard C. Body composition changes over 9 years in healthy elderly subjects and impact of physical activity. *Clin Nutr*. 2011;30(4):436-442.
46. Doherty TJ. Invited review: Aging and sarcopenia. *J Appl Physiol* (1985). 2003;95(4):1717-1727.
47. Samson MM, Meeuwse IB, Crowe A, Dessens JA, Duursma SA, Verhaar HJ. Relationships between physical performance measures, age, height and body weight in healthy adults. *Age Ageing*. 2000;29(3):235-242
48. Phillips SK, Rook KM, Siddle NC, Bruce SA, Woledge RC. Muscle weakness in women occurs at an earlier age than in men, but strength is preserved by hormone replacement therapy. *Clin Sci*. 1993;84(1):95-98
49. Rosenfeld CS. Sex-dependent differences in voluntary physical activity. *J Neurosci Res*. 2017;95(1-2):279-290.
50. Wang Z, Heo M, Lee RC, Kotler DP, Withers RT, Heymsfield SB. Muscularity in adult humans: proportion of adipose tissue-free body mass as skeletal muscle. *Am J Hum Biol*. 2001;13(5):612-619.
51. Rahman M, Berenson AB. Racial difference in lean mass distribution among reproductive-aged women. *Ethn Dis*. 2010;20(4):346-352
52. Chumlea WC, Guo SS, Kuczmarski RJ, et al. Body composition estimates from NHANES III bioelectrical impedance data. *Int J Obes Relat Metab Disord*. 2002;26(12):1596-1609.
53. Meng NH, Li CI, Liu CS, et al. Comparison of height- and weight-adjusted sarcopenia in a Taiwanese metropolitan older population. *Geriatr Gerontol Int* 2015;15(1):45-53.
54. Kim YS, Lee Y, Chung YS, et al. Prevalence of sarcopenia and sarcopenic obesity in the Korean population based on the Fourth Korean National Health and Nutritional Examination Surveys. *J Gerontol A Biol Sci Med Sci*. 2012;67(10):1107-1113.
55. Janssen I, Heymsfield SB, Ross R. Low relative skeletal muscle mass (sarcopenia) in older persons is associated with functional impairment and physical disability. *J Am Geriatr Soc*. 2002;50(5):889-896

1  
2  
3 502 56. Kapteyn A, Banks J, Hamer M, et al. What they say and what they do: comparing  
4 503 physical activity across the USA, England and the Netherlands. *J Epidemiol*  
5 504 *Community Health*. 2018;72(6):471-476.  
6  
7 505  
8  
9 506  
10  
11  
12  
13  
14  
15  
16  
17  
18  
19  
20  
21  
22  
23  
24  
25  
26  
27  
28  
29  
30  
31  
32  
33  
34  
35  
36  
37  
38  
39  
40  
41  
42  
43  
44  
45  
46  
47  
48  
49  
50  
51  
52  
53  
54  
55  
56  
57  
58  
59  
60

For peer review only

1  
2  
3 507 **Figure Legends**  
4

5  
6 508 **Figure 1.** Prevalence of obesity stratified by sex (A), age (B) and racial group (C) from 1999  
7  
8 509 to 2006 in the NHANES surveys. 95% CI: 95% confidence interval. P values refer to  
9  
10 510 temporal trends obtained by logistic regression models after adjusting for sex, age, race,  
11  
12 511 education level, annual household income, time spent watching TV per day, and physical  
13  
14 512 activity level.

15 513 **Figure 2.** Distribution of body composition measurements, including SMI (A), WC (B),  
16  
17 514 BMD (C), and TPF (D), by sex, age and racial group from 1999 to 2006. SMI: Skeletal  
18  
19 515 muscle index; WC: Waist circumference; BMD: Bone mineral density; TPF: Total percentage  
20  
21 516 of body fat; 95% CI: 95% confidence interval. P values refer to temporal trends obtained by  
22  
23 517 logistic regression models after adjusting for sex, age, race, education level, annual household  
24  
25 518 income, time spent watching TV per day, and physical activity level.  
26  
27  
28  
29  
30  
31  
32  
33  
34  
35  
36  
37  
38  
39  
40  
41  
42  
43  
44  
45  
46  
47  
48  
49  
50  
51  
52  
53  
54  
55  
56  
57  
58  
59  
60

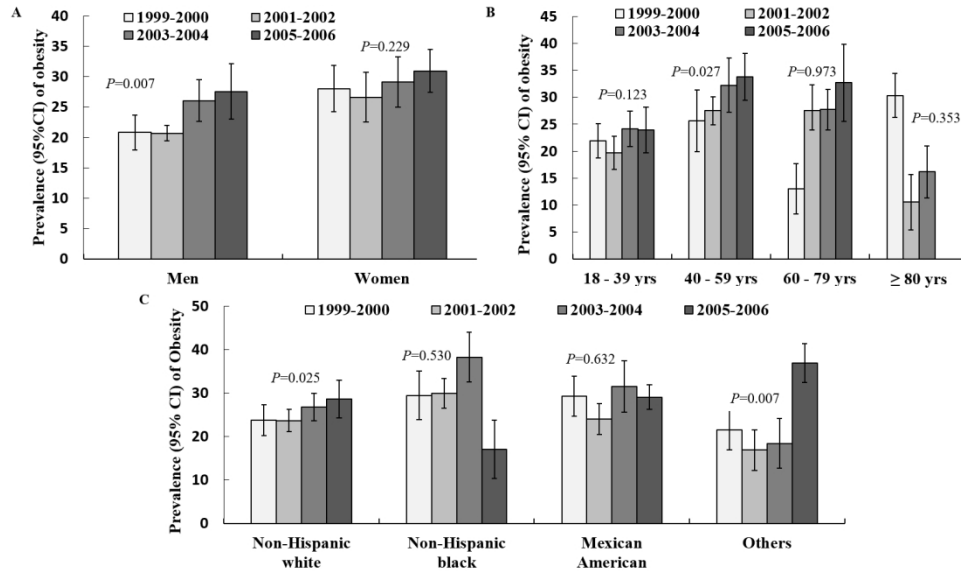

Figure 1. Prevalence of obesity stratified by sex (A), age (B) and racial group (C) from 1999 to 2006 in the NHANES surveys. 95% CI: 95% confidence interval. P values refer to temporal trends obtained by logistic regression models after adjusting for sex, age, race, education level, annual household income, time spent watching TV per day, and physical activity level

296x182mm (150 x 150 DPI)



Figure 2. Distribution of body composition measurements, including SMI (A), WC (B), BMD (C), and TPF (D), by sex, age and racial group from 1999 to 2006. SMI: Skeletal muscle index; WC: Waist circumference; BMD: Bone mineral density; TPF: Total percentage of body fat; 95% CI: 95% confidence interval. P values refer to temporal trends obtained by logistic regression models after adjusting for sex, age, race, education level, annual household income, time spent watching TV per day, and physical activity level.

325x376mm (150 x 150 DPI)



STROBE Statement—Checklist of items that should be included in reports of *cross-sectional studies*

|                           | Item No      | Recommendation                                                                                                                                                                                                                                                                                                                                                                                                |
|---------------------------|--------------|---------------------------------------------------------------------------------------------------------------------------------------------------------------------------------------------------------------------------------------------------------------------------------------------------------------------------------------------------------------------------------------------------------------|
| <b>Title and abstract</b> | Page: 1, 3   | (a) Indicate the study's design with a commonly used term in the title or the abstract<br>(b) Provide in the abstract an informative and balanced summary of what was done and what was found                                                                                                                                                                                                                 |
| <b>Introduction</b>       |              |                                                                                                                                                                                                                                                                                                                                                                                                               |
| Background/rationale      | Page: 5-6    | Explain the scientific background and rationale for the investigation being reported                                                                                                                                                                                                                                                                                                                          |
| Objectives                | Page: 6      | State specific objectives, including any prespecified hypotheses                                                                                                                                                                                                                                                                                                                                              |
| <b>Methods</b>            |              |                                                                                                                                                                                                                                                                                                                                                                                                               |
| Study design              | Page: 6      | Present key elements of study design early in the paper                                                                                                                                                                                                                                                                                                                                                       |
| Setting                   | Page: 6      | Describe the setting, locations, and relevant dates, including periods of recruitment, exposure, follow-up, and data collection                                                                                                                                                                                                                                                                               |
| Participants              | Page: 6      | (a) Give the eligibility criteria, and the sources and methods of selection of participants                                                                                                                                                                                                                                                                                                                   |
| Variables                 | Page: 6-7    | Clearly define all outcomes, exposures, predictors, potential confounders, and effect modifiers. Give diagnostic criteria, if applicable                                                                                                                                                                                                                                                                      |
| Data sources/measurement  | Page: 6-7    | For each variable of interest, give sources of data and details of methods of assessment (measurement). Describe comparability of assessment methods if there is more than one group                                                                                                                                                                                                                          |
| Bias                      | Page: 7-8    | Describe any efforts to address potential sources of bias                                                                                                                                                                                                                                                                                                                                                     |
| Study size                | Page: 6      | Explain how the study size was arrived at                                                                                                                                                                                                                                                                                                                                                                     |
| Quantitative variables    | Page: 7-8    | Explain how quantitative variables were handled in the analyses. If applicable, describe which groupings were chosen and why                                                                                                                                                                                                                                                                                  |
| Statistical methods       | Page: 7-8    | (a) Describe all statistical methods, including those used to control for confounding<br>(b) Describe any methods used to examine subgroups and interactions<br>(c) Explain how missing data were addressed<br>(d) If applicable, describe analytical methods taking account of sampling strategy<br>(e) Describe any sensitivity analyses                                                                    |
| <b>Results</b>            |              |                                                                                                                                                                                                                                                                                                                                                                                                               |
| Participants              | Page: 8      | (a) Report numbers of individuals at each stage of study—eg numbers potentially eligible, examined for eligibility, confirmed eligible, included in the study, completing follow-up, and analysed<br>(b) Give reasons for non-participation at each stage<br>(c) Consider use of a flow diagram                                                                                                               |
| Descriptive data          | Page: 8-9    | (a) Give characteristics of study participants (eg demographic, clinical, social) and information on exposures and potential confounders<br>(b) Indicate number of participants with missing data for each variable of interest                                                                                                                                                                               |
| Outcome data              | Page: 12, 15 | Report numbers of outcome events or summary measures                                                                                                                                                                                                                                                                                                                                                          |
| Main results              | Page: 12, 15 | (a) Give unadjusted estimates and, if applicable, confounder-adjusted estimates and their precision (eg, 95% confidence interval). Make clear which confounders were adjusted for and why they were included<br>(b) Report category boundaries when continuous variables were categorized<br>(c) If relevant, consider translating estimates of relative risk into absolute risk for a meaningful time period |
| Other analyses            | Page: 12     | Report other analyses done—eg analyses of subgroups and interactions, and sensitivity                                                                                                                                                                                                                                                                                                                         |

1  
2  
3  
4  
5  
6  
7  
8  
9  
10  
11  
12  
13  
14  
15  
16  
17  
18  
19  
20  
21  
22  
23  
24  
25  
26  
27  
28  
29  
30  
31  
32  
33  
34  
35  
36  
37  
38  
39  
40  
41  
42  
43  
44  
45  
46  
47  
48  
49  
50  
51  
52  
53  
54  
55  
56  
57  
58  
59  
60

---

analyses

---



---

**Discussion**

---

|                  |             |                                                                                                                                                                            |
|------------------|-------------|----------------------------------------------------------------------------------------------------------------------------------------------------------------------------|
| Key results      | Page: 17    | Summarise key results with reference to study objectives                                                                                                                   |
| Limitations      | Page: 19-20 | Discuss limitations of the study, taking into account sources of potential bias or imprecision. Discuss both direction and magnitude of any potential bias                 |
| Interpretation   | Page: 17-20 | Give a cautious overall interpretation of results considering objectives, limitations, multiplicity of analyses, results from similar studies, and other relevant evidence |
| Generalisability | Page: 18    | Discuss the generalisability (external validity) of the study results                                                                                                      |

---

**Other information**

---

|         |          |                                                                                                                                                               |
|---------|----------|---------------------------------------------------------------------------------------------------------------------------------------------------------------|
| Funding | Page: 21 | Give the source of funding and the role of the funders for the present study and, if applicable, for the original study on which the present article is based |
|---------|----------|---------------------------------------------------------------------------------------------------------------------------------------------------------------|

---

\*Give information separately for exposed and unexposed groups.

**Note:** An Explanation and Elaboration article discusses each checklist item and gives methodological background and published examples of transparent reporting. The STROBE checklist is best used in conjunction with this article (freely available on the Web sites of PLoS Medicine at <http://www.plosmedicine.org/>, Annals of Internal Medicine at <http://www.annals.org/>, and Epidemiology at <http://www.epidem.com/>). Information on the STROBE Initiative is available at [www.strobe-statement.org](http://www.strobe-statement.org).
